# Supplementary material for: A selective photoinduced radical O-alkenylation of phenols and naphthols with terminal alkynes
Source: Royal Society of Chemistry journal article supplement (doi:10.1039/d4cc02555e), 2024-01-01
Supplement: d4cc02555e1.pdf [file d4cc02555e1.pdf]

***Supporting Information***

**Photoinduced Radical Selective O-Alkenylation of Phenols and Naphthols with Terminal Alkynes**

**V. Praveen Kumar<sup>a,b</sup>, C. S Athira<sup>a,b</sup>, B. Mohan<sup>a,b</sup>, S. Priya<sup>b,c</sup>, and B. S. Sasidhar<sup>\*,a,b</sup>**

---

<sup>a</sup> *Chemical Sciences and Technology Division,, CSIR-National Institute for Interdisciplinary Science and Technology (CSIR-NIIST), Thiruvananthapuram-695019, Kerala, India.*

<sup>b</sup> *Academy of Scientific and Innovative Research (AcSIR), Ghaziabad, 201002, India*

<sup>c</sup> *Agro-processing and Technology Division, CSIR-National Institute for Interdisciplinary Science and Technology (CSIR-NIIST), Thiruvananthapuram-695019, Kerala, India.*

---

[drsasidharbs@niist.res.in](mailto:drsasidharbs@niist.res.in) and [drsasidharbs@gmail.com](mailto:drsasidharbs@gmail.com)

## CONTENT

|                                                        |                |
|--------------------------------------------------------|----------------|
| <b>1. General methods</b>                              | <b>S2</b>      |
| <b>2. Table S1</b>                                     | <b>S3</b>      |
| <b>3. Experimental procedures</b>                      | <b>S5</b>      |
| <b>4. Cyclic voltammetry (CV) measurements</b>         | <b>S6</b>      |
| <b>5. Control experiments</b>                          | <b>S6</b>      |
| <b>6. Product transformations</b>                      | <b>S7</b>      |
| <b>7. Characterisation of synthesised compounds</b>    | <b>S9-S17</b>  |
| <b>8. <sup>1</sup>H and <sup>13</sup>C NMR spectra</b> | <b>S18-S44</b> |

### 1. General Methods

#### 1.1 General Experimental Methods

All the reactions are performed with commercially available best-grade chemicals without further purification. All of the solvents used are reagent-grade and commercially available. Column chromatography was performed using 100–200 mesh silica gel, and mixtures of hexane–ethyl acetate were used for the elution of the products. Proton nuclear magnetic resonance spectra (<sup>1</sup>H NMR) were recorded on a Bruker AMX 500 spectrometer (CDCl<sub>3</sub> as solvent). Chemical shifts for <sup>1</sup>H NMR spectra are reported as δ in units of parts per million (ppm) downfield from SiMe<sub>4</sub> (δ 0.0) and relative to the signal of chloroform-d (δ 7.25, singlet). Multiplicities are given as s (singlet); d (doublet); t (triplet); q (quartet); dd (doublet of doublet); dt (doublet of triplet); m (multiplet). Coupling constants are reported as *J* values in Hz. Carbon nuclear magnetic resonance spectra <sup>13</sup>C{<sup>1</sup>H} NMR are reported as δ in units of parts per million (ppm) downfield from SiMe<sub>4</sub> (δ 0.0) and relative to the signal of chloroform-d (δ 77.03, triplet). The mass spectra were recorded under EI/HRMS at 60,000 resolutions using a Thermo Scientific Exactive mass spectrometer.

**Table S1: optimisation of reaction conditions<sup>a</sup>**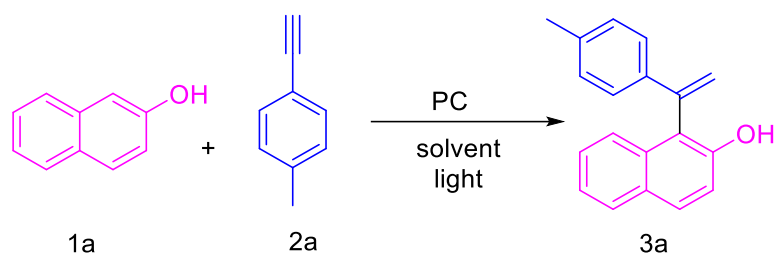

| entry | 1a<br>(equiv.) | 2a<br>(equiv.) | photocatalyst                                    | Additive<br>(oxidant) | solvent            | Light<br>source | yield<br>(%) |
|-------|----------------|----------------|--------------------------------------------------|-----------------------|--------------------|-----------------|--------------|
| 1     | 1              | 1.2            | T( <i>p</i> -F)PPT                               | -                     | DCM                | White<br>LED    | 40           |
| 2     | 1              | 2              | T( <i>p</i> -F)PPT                               | -                     | DCE                | White<br>LED    | 15           |
| 3     | 1              | 2              | T( <i>p</i> -F)PPT                               | -                     | CH <sub>3</sub> CN | White<br>LED    | N.D          |
| 4     | 1              | 2              | T( <i>p</i> -F)PPT                               | -                     | MeOH               | White<br>LED    | N.D          |
| 5     | 1              | 2              | T( <i>p</i> -F)PPT                               | -                     | HFIP               | White<br>LED    | N.D          |
| 6     | 1              | 2              | T( <i>p</i> -F)PPT                               | -                     | TFE                | White<br>LED    | N.D          |
| 7     | 1              | 2              | T( <i>p</i> -F)PPT                               | -                     | DCM                | White<br>LED    | 89           |
| 8     | 1              | 2.5            | T( <i>p</i> -F)PPT                               | -                     | DCM                | White<br>LED    | 70           |
| 9     | 1              | 3              | T( <i>p</i> -F)PPT                               | -                     | DCM                | White<br>LED    | 69           |
| 10    | 1              | 2              | MesAcr <sup>+</sup> BF <sub>4</sub> <sup>-</sup> | -                     | DCM                | White<br>LED    | N.D          |
| 11    | 1              | 2              | Eosin Y                                          | -                     | DCM                | White<br>LED    | N.D          |
| 12    | 1              | 2              | Rose bengal                                      | -                     | DCM                | White<br>LED    | N.D          |

|    |   |   |                      |                                                               |     |           |                 |
|----|---|---|----------------------|---------------------------------------------------------------|-----|-----------|-----------------|
| 13 | 1 | 2 | TPPT                 | -                                                             | DCM | White LED | N.D             |
| 14 | 1 | 2 | T( <i>p</i> -Cl)PPT  | -                                                             | DCM | White LED | 15              |
| 15 | 1 | 2 | T( <i>p</i> -Me)PPT  | -                                                             | DCM | White LED | N.D             |
| 16 | 1 | 2 | T( <i>p</i> -OMe)PPT | -                                                             | DCM | White LED | trace           |
| 17 | 1 | 2 | T( <i>p</i> -F)PPT   | -                                                             | TFE | White LED | 18              |
| 18 | 1 | 2 | T( <i>p</i> -Br)PPT  | -                                                             | DCM | White LED | 5               |
| 19 | 1 | 2 | T( <i>p</i> -F)PPT   | -                                                             | DCM | White LED | 80 <sup>b</sup> |
| 20 | 1 | 2 | T( <i>p</i> -F)PPT   | -                                                             | DCM | White LED | 78 <sup>c</sup> |
| 21 | 1 | 2 | T( <i>p</i> -F)PPT   | K <sub>2</sub> S <sub>2</sub> O <sub>8</sub>                  | DCM | White LED | ND              |
| 22 | 1 | 2 | T( <i>p</i> -F)PPT   | (NH <sub>4</sub> ) <sub>2</sub> S <sub>2</sub> O <sub>8</sub> | DCM | White LED | trace           |
| 23 | 1 | 2 | T( <i>p</i> -F)PPT   | Na <sub>2</sub> S <sub>2</sub> O <sub>8</sub>                 | DCM | White LED | trace           |
| 24 | 1 | 2 | No catalyst          | -                                                             | DCM | White LED | ND              |
| 25 | 1 | 2 | T( <i>p</i> -F)PPT   | -                                                             | DCM | No light  | ND              |
| 26 | 1 | 2 | T( <i>p</i> -F)PPT   | -                                                             | DCM | Green LED | ND              |
| 27 | 1 | 2 | T( <i>p</i> -F)PPT   | -                                                             | DCM | Red LED   | ND              |

<sup>a</sup>unless otherwise mentioned **1a** (0.3468 mmol), **2a** (2 equiv.) and 5 mol% catalysts in 1 mL of solvent. <sup>b</sup>10 mol% catalyst added. <sup>c</sup>15 mol% catalyst added. ND: Not detected

## 2. Experimental procedures

### 2.1 General procedure for preparation of 2-hydroxy styrenes

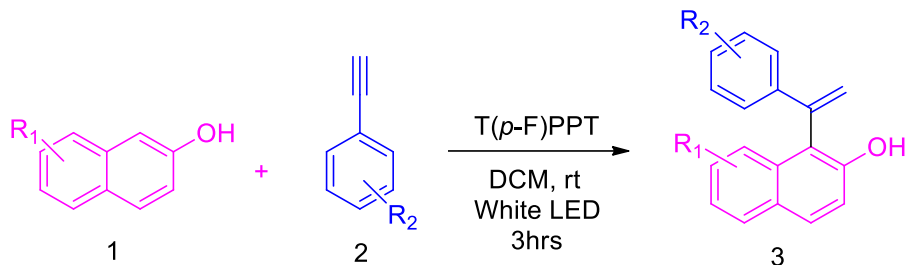

To a 5 dram glass vial equipped with a magnetic stir bar **1** (0.3468 mmol), **2** (0.6936 mmol), 1 mL of DCM solvent and photocatalyst T(*p*-F)PPT (5 mol%) were sequentially added. The solution was stirred at a distance of ~3 cm from 20 W white LED at room temperature. After the completion of the reaction monitored by TLC, the solvent was removed in *vacuo* and extracted with ethyl acetate (3x10 ml), organic layers were dried over  $\text{Na}_2\text{SO}_4$  and evaporated in *vacuo* and purified by column chromatography using 100–200 mesh silica gel with ethyl acetate/hexane (1:9) as the eluent to afford the corresponding hydroarylated compounds as the product.

#### 2.1.1 Procedure for the gram scale preparation of 2-hydroxy styrenes

To a 5 dram glass vial equipped with a magnetic stir bar **1** (0.010 mol), **2** (0.020 mol) DCM solvent and photocatalyst T(*p*-F)PPT (5 mol%) were sequentially added. The solution was stirred at a distance of ~3 cm from 20 W white LED at room temperature. After the completion of the reaction monitored by TLC, the solvent was removed in *vacuo* and extracted with ethyl acetate (3x10 ml), organic layers were dried over  $\text{Na}_2\text{SO}_4$  and evaporated in *vacuo* and purified by column chromatography using 100–200 mesh silica gel with ethyl acetate / hexane (1:9) as the eluent to afford the corresponding hydroarylated compounds as products.

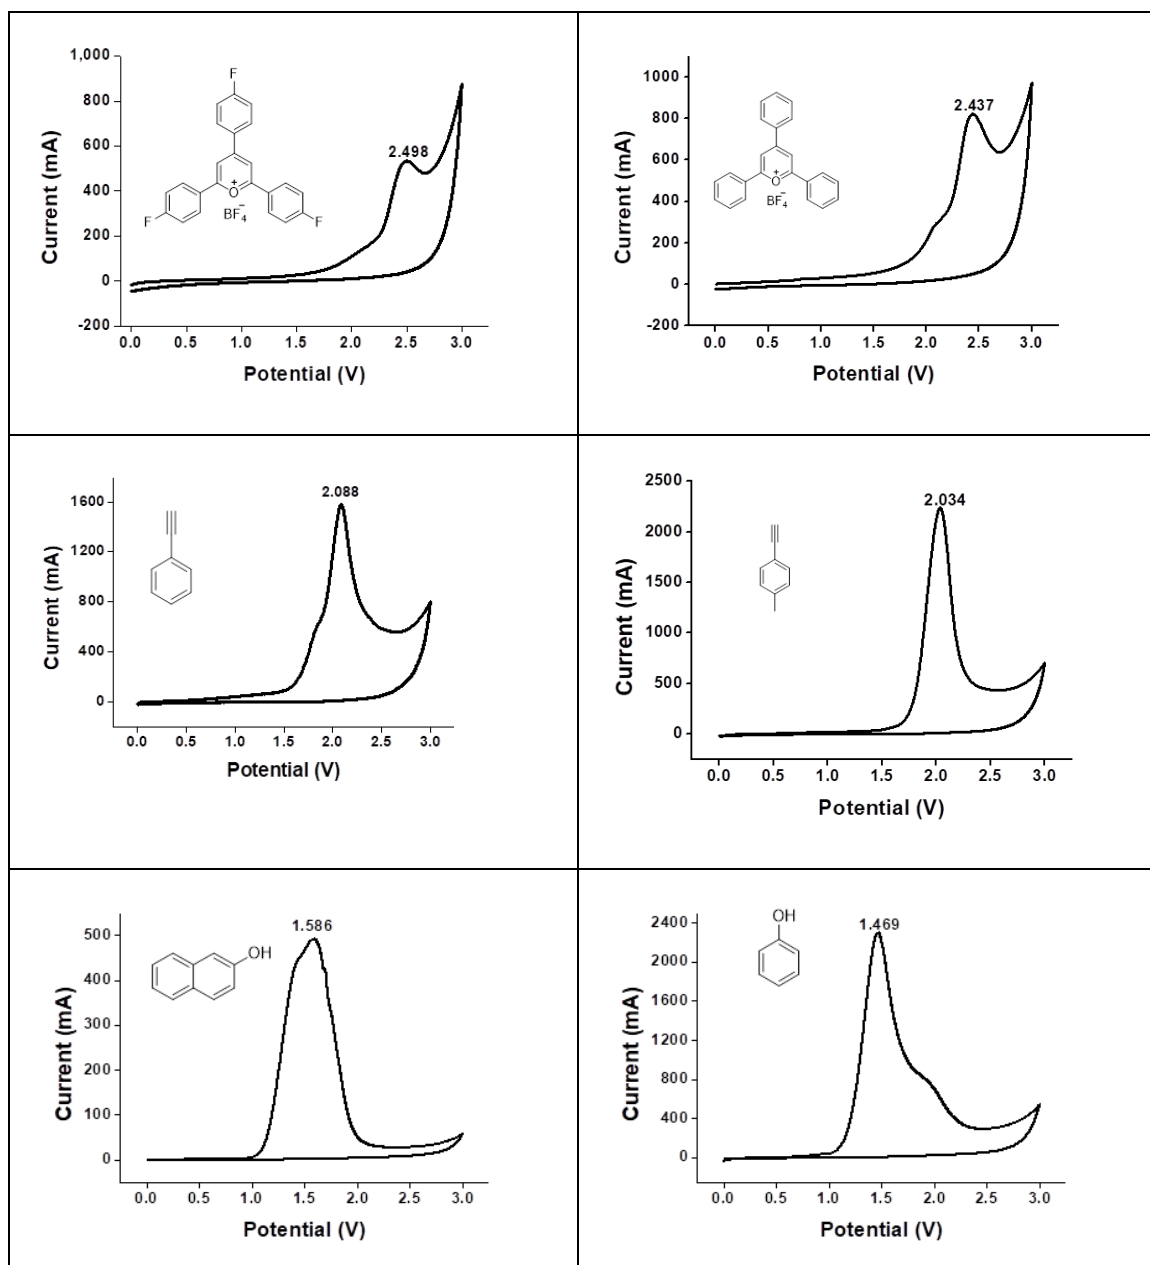

**Figure S1.** Cyclic voltammetry (CV) measurements

## 2.2 Control experiments

To a 5 dram glass vial equipped with a magnetic stir bar **1** (0.3468 mmol), **2** (0.6936 mmol), 1 mL of DCM solvent and photocatalyst T(*p*-F)PPT (5 mol%) and TEMPO were sequentially added. The solution was stirred at a distance of ~3 cm from 20W white LED at room temperature. After the completion of the reaction monitored by TLC, the solvent was removed in *vacuo* and extracted with ethyl acetate (3x10 ml), organic layers were dried over Na<sub>2</sub>SO<sub>4</sub> and evaporated in *vacuo* and purified by column chromatography using 100–200

mesh silica gel with ethyl acetate / hexane (1:9) as the eluent to afford the corresponding hydroarylated compounds as products.

No hydroarylated products were formed in the presence of the TEMPO reagent instead TEMPO adduct of the 2-Naphthol 1a was detected in LCMS **Figure S2**. Which indicates the involvement of the radical pathway.

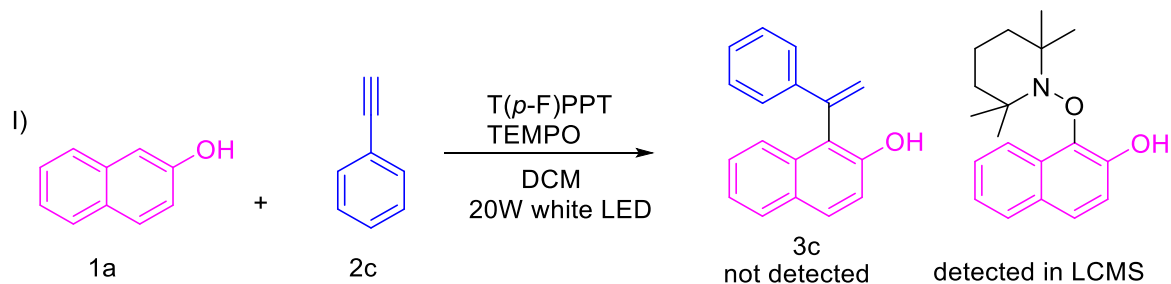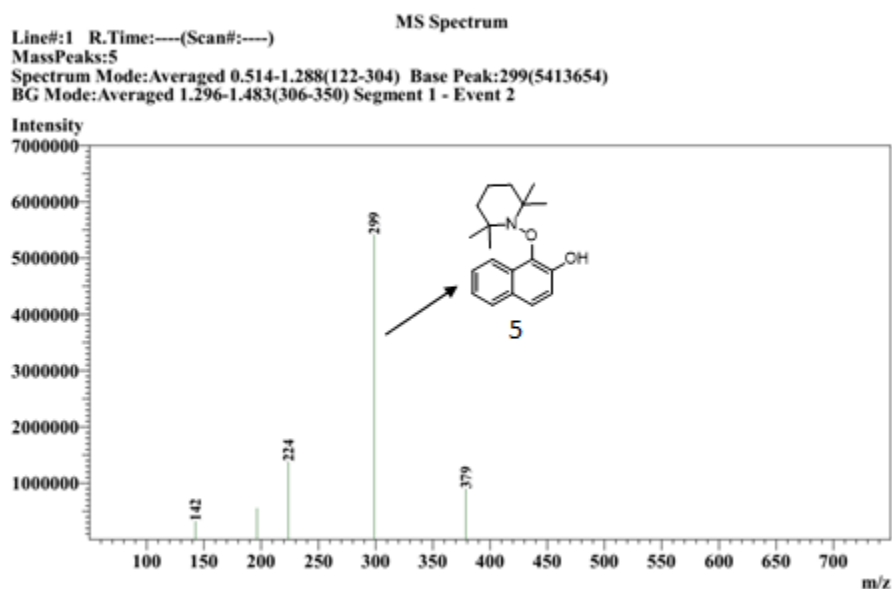

**Figure S2.** LCMS spectrum of TEMPO adduct 5

## 2.3 Product transformations

### 2.3.1. General procedure for one pot synthesis of vinyl iodide<sup>1</sup>

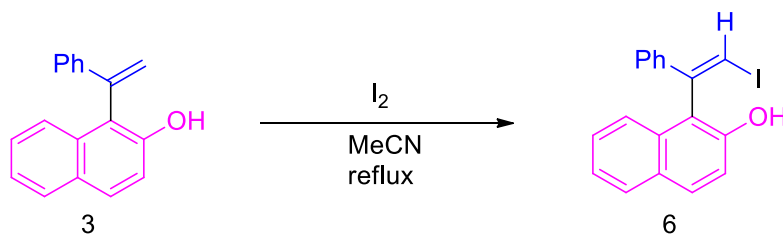

To a round bottom flask equipped with a magnetic stir bar **1** (0.3468 mmol), **2** (0.6936 mmol), 2 mL of DCM solvent and photocatalyst T(*p*-F)PPT (5 mol%) were sequentially added. The solution was stirred at a distance of ~3 cm from 20W white LED at room temperature. After the completion of the reaction monitored by TLC the solvent was removed in *vacuo* then to this crude I<sub>2</sub> (128.8 mg, 2.5 mmol), and MeCN (2mL) was added. The reaction mixture was refluxed for 4 h. allowed the reaction to cool at room temperature and quenched with Na<sub>2</sub>S<sub>2</sub>O<sub>3</sub> solution, then extracted with Ethyl acetate (2 x 10mL). The combined organic layer was dried over anhydrous Na<sub>2</sub>SO<sub>4</sub> and then concentrated under reduced pressure to afford the crude product. The residue was purified by column chromatography using 100–200 mesh silica gel with hexane /ethyl acetate (10 : 2, v/v) to afford the product **6** (96 mg, 74% yield). The NMR chemical shifts of **6** match with the previously reported values.

1. P. Kaswan, G. M. Shelke, V. K. Rao, A. Kumar, *Synlett* **2016**, 27, 2553-2556

### 2.3.2. General procedure for one pot synthesis of naphthofuran derivatives<sup>2</sup>

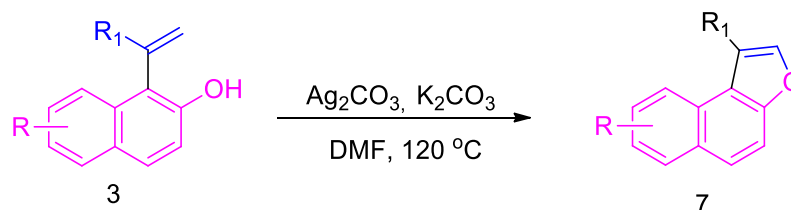

To a round bottom flask equipped with a magnetic stir bar **1** (0.3468 mmol), **2** (0.6936 mmol), 2 mL of DCM solvent and photocatalyst T(*p*-F)PPT (5 mol%) were sequentially added. The solution was stirred at a distance of ~ 3cm from 20W white LED at room temperature. After the completion of reaction monitored by TLC the solvent was removed in *vacuo* then to this crude K<sub>2</sub>CO<sub>3</sub> (67.8mg, 0.4912 mmol) and AgCO<sub>3</sub> (90.3mg, 0.3274 mmol) DMF (2 mL), was added under Ar atmosphere, and stirred at 120 °C for 20 h. allow the reaction mixture to cool down and add 5mL of water into the reaction mixture and then extracted with ethyl acetate (EA) (3x15mL). ). The combined organic layer was dried over anhydrous Na<sub>2</sub>SO<sub>4</sub>. After concentration, the residue was purified by column chromatography using 100–200 mesh silica gel with hexane /ethyl acetate (10 : 1, v/v) to afford the product **7**.

2. W. Wang, J. Huang, R. Zhou, Z.-J. Jiang, H.-Y. Fu, X.-L. Zheng, H. Chen, R.-X. Li, *Adv.Synth. Catal.* **2015**, 357, 2442-2446



### 3. Characterisation of synthesised compounds

|   |                                                                                                                                                                                                               |                                                                                                                                                                                                                                                                                                                                                                                                                                                                                                                                                                                  |
|---|---------------------------------------------------------------------------------------------------------------------------------------------------------------------------------------------------------------|----------------------------------------------------------------------------------------------------------------------------------------------------------------------------------------------------------------------------------------------------------------------------------------------------------------------------------------------------------------------------------------------------------------------------------------------------------------------------------------------------------------------------------------------------------------------------------|
| 1 | 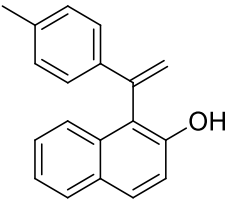 <p style="text-align: center;">3a</p> <p style="text-align: center;"><b>1-(1-(p-tolyl)vinyl)naphthalen-2-ol</b></p>         | <p>Pale yellow liquid (80.34mg, 89% Yield); <sup>1</sup>H NMR (500 MHz, CDCl<sub>3</sub>) δ 7.70 - 7.71 (m, 2H), 7.43 - 7.44 (m, 3H), 7.20 - 7.22 (m, 2H), 7.16 (d, J = 8.0 Hz, 3H), 6.99 (d, J = 10.0 Hz, 2H), 6.20 (s, 1H), 5.56 (s, 1H), 5.37 (s, 1H), 2.23 (s, 3H). <sup>13</sup>C{<sup>1</sup>H} NMR (125 MHz, CDCl<sub>3</sub>) δ 150.4, 142.3, 138.6, 135.92, 132.8, 129.5, 129.4, 128.9, 128.0, 126.5, 126.2, 124.9, 123.3, 120.2, 117.9, 117.3, 21.2. HRMS (ESI-Orbitrap) m/z: Calcd. for C<sub>19</sub>H<sub>16</sub>O([M+H]<sup>+</sup>) 261.1279; found 261.1275</p> |
| 2 |  <p style="text-align: center;">3b</p> <p style="text-align: center;"><b>1-(1-(4-methoxyphenyl)vinyl)naphthalen-2-ol</b></p> | <p>White solid (86.30 mg, 90% Yield); Mp: 82-84 °C; <sup>1</sup>H NMR (500 MHz, CDCl<sub>3</sub>) δ 7.63-7.67 (m, 2H), 7.41 - 7.42 (m, 1H), 7.14 - 7.19 (m, 5H), 6.66 (d, J = 8.5 Hz, 2H), 6.08 (s, 1H), 5.58 (s, 1H), 5.26 (s, 1H), 3.62 (s, 3H). <sup>13</sup>C{<sup>1</sup>H} NMR (125 MHz, CDCl<sub>3</sub>) δ 159.9, 150.4, 141.8, 132.87, 131.2, 129.5, 128.9, 128.0, 127.7, 126.5, 125.0, 123.3, 120.3, 117.3, 116.7, 114.1, 55.3. HRMS (ESI-Orbitrap) m/z: Calcd. for C<sub>19</sub>H<sub>16</sub>O<sub>2</sub> ([M+H]<sup>+</sup>) 277.1228; found 277.1228</p>         |
| 3 |  <p style="text-align: center;">3c</p> <p style="text-align: center;"><b>1-(1-phenylvinyl)naphthalen-2-ol</b></p>          | <p>Pale yellow solid (71mg, 83% Yield); Mp: 112-113 °C ; <sup>1</sup>H NMR (500 MHz, CDCl<sub>3</sub>) δ 7.70 - 7.73 (m, 2H), 7.43 - 7.45 (m, 1H), 7.28 - 7.30 (m, 2H), 7.18 - 7.23 (m, 6H), 6.26 (s, 1H), 5.55 (s, 1H), 5.44 (s, 1H). <sup>13</sup>C{<sup>1</sup>H} NMR (125 MHz, CDCl<sub>3</sub>) δ 150.4, 142.5, 138.7, 132.79, 129.6, 128.9, 128.7, 128.5, 128.0, 126.5, 126.3, 124.9, 123.3, 120.0, 118.9, 117.3, 77.2, 77.0, 76.7. HRMS (ESI-Orbitrap) m/z: Calcd for C<sub>18</sub>H<sub>14</sub>O([M+H]<sup>+</sup>) 247.1122; found 247.1122</p>                       |

|   |                                                                                                                                                                                                                   |                                                                                                                                                                                                                                                                                                                                                                                                                                                                                                                                                                                                                                                      |
|---|-------------------------------------------------------------------------------------------------------------------------------------------------------------------------------------------------------------------|------------------------------------------------------------------------------------------------------------------------------------------------------------------------------------------------------------------------------------------------------------------------------------------------------------------------------------------------------------------------------------------------------------------------------------------------------------------------------------------------------------------------------------------------------------------------------------------------------------------------------------------------------|
| 4 | 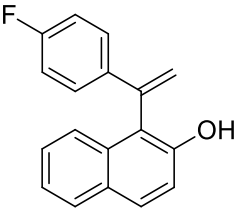 <p style="text-align: center;">3d</p> <p style="text-align: center;"><b>1-(1-(4-fluorophenyl)vinyl)<br/>naphthalen-2-ol</b></p> | <p>Yellow viscous liquid (70mg, 76% Yield); <sup>1</sup>H NMR (500 MHz, CDCl<sub>3</sub>) δ 7.70–7.73 (m, 2H), 7.39–7.40 (m, 1H), 7.18–7.25 (m, 5H), 6.88(t, <i>J</i> = 8.0 Hz, 2H), 6.19 (s, 1H), 5.50 (s, 1H), 5.41 (s, 1H).</p> <p><sup>13</sup>C{<sup>1</sup>H} NMR (125 MHz, CDCl<sub>3</sub>) δ 163.9, 161.9, 150.4, 141.57, 134.9, 134.8, 132.6, 129.8, 128.9, 128.1, 128.1, 128.0, 126.6, 124.7, 123.4, 119.7, 118.5, 117.3, 115.7, 115.5. <sup>19</sup>F NMR (371 MHz, Chloroform-<i>d</i>) δ -113.11 (s, 1F)</p> <p><b>HRMS (ESI) m/z:</b> Calcd. for C<sub>18</sub>H<sub>13</sub>FO([M+H]<sup>+</sup>) 265.1028; found 265.1039</p>       |
| 5 |  <p style="text-align: center;">3e</p> <p style="text-align: center;"><b>1-(1-(thiophen-3-yl)vinyl)naphthalen-2-ol</b></p>      | <p>Pale yellow liquid (61mg, 75% Yield); <sup>1</sup>H NMR (500 MHz, CDCl<sub>3</sub>) δ 7.70 (d, <i>J</i> = 8.5 Hz, 2H), 7.50 (d, <i>J</i> = 8.5 Hz, 1H), 7.22–7.28 (m, 4H), 7.17 (d, <i>J</i> = 8.0 Hz, 1H), 6.74 (s, 1H), 6.16 (s, 1H), 5.48 (s, 1H), 5.35 (s, 1H).</p> <p><sup>13</sup>C{<sup>1</sup>H} NMR (125 MHz, CDCl<sub>3</sub>) δ 150.0, 140.9, 137.3, 132.71, 129.6, 128.8, 128.0, 126.5, 125.1, 124.8, 124.2, 123.3, 120.2, 117.7, 117.3.</p> <p><b>HRMS (ESI-Orbitrap) m/z:</b> Calcd. for C<sub>16</sub>H<sub>12</sub>OS([M+H]<sup>+</sup>) 253.0687; found 253.0695</p>                                                             |
| 6 |  <p style="text-align: center;">3f</p> <p style="text-align: center;"><b>1-(1-(4-propylphenyl)vinyl)naphthalen-2-ol</b></p>    | <p>yellow liquid (95mg, 95% Yield); <sup>1</sup>H NMR (500 MHz, CDCl<sub>3</sub>) δ 7.70–7.72 (m, 2H), 7.45–7.46 (m, 1H), 7.17–7.23 (m, 5H), 7.00 (d, <i>J</i> = 8.0 Hz, 2H), 6.22 (s, 1H), 5.54 (s, 1H), 5.38 (s, 1H), 2.47 (t, <i>J</i> = 7.5 Hz, 2H), 2.05 (sext, 2H), 0.84 (t, <i>J</i> = 7.5 Hz, 3H).</p> <p><sup>13</sup>C{<sup>1</sup>H} NMR (125 MHz, CDCl<sub>3</sub>) δ 150.3, 143.4, 142.3, 136.0, 132.85, 129.5, 128.9, 128.8, 128.0, 126.5, 126.2, 124.9, 123.2, 120.2, 118.0, 117.3, 37.7, 24.4, 13.8.</p> <p><b>HRMS (ESI-Orbitrap) m/z:</b> Calcd. for C<sub>21</sub>H<sub>20</sub>O([M+H]<sup>+</sup>) 289.1592; found 289.1593</p> |

|   |                                                                                                                                                                                                                          |                                                                                                                                                                                                                                                                                                                                                                                                                                                                                                                                                                                                                                                                                                                                                        |
|---|--------------------------------------------------------------------------------------------------------------------------------------------------------------------------------------------------------------------------|--------------------------------------------------------------------------------------------------------------------------------------------------------------------------------------------------------------------------------------------------------------------------------------------------------------------------------------------------------------------------------------------------------------------------------------------------------------------------------------------------------------------------------------------------------------------------------------------------------------------------------------------------------------------------------------------------------------------------------------------------------|
| 7 | 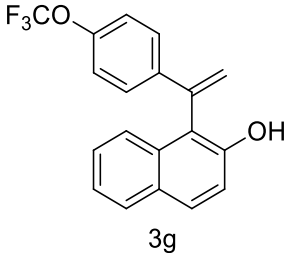 <p style="text-align: center;">3g</p> <p style="text-align: center;"><b>1-(1-(4-(trifluoromethoxy)phenyl)vinyl)naphthalen-2-ol</b></p> | <p>Yellow viscous liquid (80.30mg, 70% Yield); <b><sup>1</sup>H NMR (500 MHz, CDCl<sub>3</sub>)</b> δ 7.71 – 7.74 (m, 2H), 7.38 – 7.40 (m, 1H), 7.29 (d, <i>J</i> = 8.5 Hz, 2H), 7.24 – 7.25 (m, 2H), 7.18 – 7.21 (m, 1H), 7.03 - 7.05 (d, <i>J</i> = 8.5 Hz, 2H), 6.25 (s, 1H), 5.50 (s, 1H), 5.48 (s, 1H).</p> <p><b><sup>13</sup>C{<sup>1</sup>H} NMR (125 MHz, CDCl<sub>3</sub>)</b> δ 150.4, 149.3, 141.3, 137.38, 132.5, 129.9, 128.9, 128.1, 127.7, 126.7, 124.6, 123.4, 121.0, 119.6, 119.4, 117.3.</p> <p><b><sup>19</sup>F NMR (371 MHz, Chloroform-<i>d</i>)</b> δ -58.84 (s, 3F)</p> <p><b>HRMS (ESI-Orbitrap) m/z:</b> Calcd. for C<sub>19</sub>H<sub>13</sub>F<sub>3</sub>O<sub>2</sub>([M+H]<sup>+</sup>) 331.0945, found 331.0948.</p> |
| 8 |  <p style="text-align: center;">3h</p> <p style="text-align: center;"><b>1-(1-(4-bromophenyl)vinyl)naphthalen-2-ol</b></p>             | <p>Pale yellow oil (82mg, 74% Yield); <b><sup>1</sup>H NMR (500 MHz, CDCl<sub>3</sub>)</b> δ 7.69 - 7.72 (m, 2H), 7.35 - 7.37 (m, 1H), 7.30 (d, <i>J</i> = 8.5 Hz, 2H), 7.16 - 7.24 (m, 3H), 7.12 (d, <i>J</i> = 8.5 Hz, 2H), 6.23 (s, 1H), 5.51 (s, 1H), 5.45 (s, 1H).</p> <p><b><sup>13</sup>C{<sup>1</sup>H} NMR (125 MHz, CDCl<sub>3</sub>)</b> δ 150.4, 141.6, 137.7, 132.63, 131.8, 129.9, 128.9, 128.1, 127.9, 126.7, 124.7, 123.4, 122.7, 119.4, 119.3, 117.3,</p> <p><b>HRMS (ESI-Orbitrap) m/z:</b> Calcd. for C<sub>18</sub>H<sub>13</sub>BrO([M+H]<sup>+</sup>) 325.0228; found 327.0173.</p>                                                                                                                                              |
| 9 |  <p style="text-align: center;">3i</p> <p style="text-align: center;"><b>1-(1-(4-ethynylphenyl)vinyl)naphthalen-2-ol</b></p>          | <p>Yellow oil (76mg, 80% Yield); <b><sup>1</sup>H NMR (500 MHz, CDCl<sub>3</sub>)</b> δ 7.72 – 7.74 (m, 2H), 7.36 – 7.38 (m, 1H), 7.32 – 7.33 (d, <i>J</i> = 8.5 Hz, 2H), 7.22 – 7.24 (m, 4H), 7.18 (d, <i>J</i> = 2.5 Hz, 1H), 6.28 (s, 1H), 5.49 - 5.50 (d, <i>J</i> = 6.5 Hz, 2H), 3.02 (s, 2H).</p> <p><b><sup>13</sup>C{<sup>1</sup>H} NMR (125 MHz, CDCl<sub>3</sub>)</b> δ 150.4, 141.9, 139.1, 132.6, 132.5, 129.8, 128.9, 128.1, 126.6, 126.2, 124.7, 123.4, 122.2, 119.8, 119.4, 117.3, 83.3, 78.2.</p> <p><b>HRMS (ESI-Orbitrap) m/z:</b> Calcd. for C<sub>20</sub>H<sub>14</sub>O([M+Na]<sup>+</sup>) 293.0942 ; found 292.0861.</p>                                                                                                       |

|    |                                                                                                                                                                                                                          |                                                                                                                                                                                                                                                                                                                                                                                                                                                                                                                                                                                                                                                                                                        |
|----|--------------------------------------------------------------------------------------------------------------------------------------------------------------------------------------------------------------------------|--------------------------------------------------------------------------------------------------------------------------------------------------------------------------------------------------------------------------------------------------------------------------------------------------------------------------------------------------------------------------------------------------------------------------------------------------------------------------------------------------------------------------------------------------------------------------------------------------------------------------------------------------------------------------------------------------------|
| 10 | 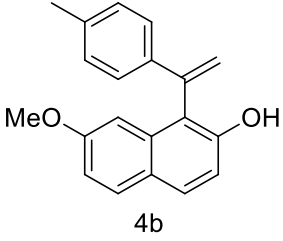 <p style="text-align: center;">4b</p> <p style="text-align: center;"><b>7-methoxy-1-(1-(p-tolyl)vinyl)naphthalen-2-ol</b></p>          | <p>Dark brown liquid (73mg, 88% yield); <sup>1</sup>H NMR (500 MHz, CDCl<sub>3</sub>) δ 7.60 (dd, <i>J</i> = 18.0 Hz, 9.0 Hz, 4H), 7.18 (d, <i>J</i> = 8.0 Hz, 2H), 7.04 (s, 1H), 6.99 -7.02 (m, 2H), 6.86 (dd, <i>J</i> = 9.0 Hz, 2.5 Hz, 1H), 6.73 (d, <i>J</i> = 2.0 Hz, 1H), 6.17 (s, 1H), 5.56 (s, 1H), .5.39 (s, 1H), 3.57 (s, 1H), 2.24 (s, 3H). <sup>13</sup>C{<sup>1</sup>H} NMR (125 MHz, CDCl<sub>3</sub>) δ 158.1, 151.0, 142.7, 138.53, 136.0, 134.0, 129.5, 129.4, 129.2, 126.3, 124.3, 119.5, 117.9, 115.5, 114.7, 104.0, 55.0, 21.1.</p> <p><b>HRMS (ESI-Orbitrap) m/z:</b> Calcd. for C<sub>20</sub>H<sub>18</sub>O<sub>2</sub>([M+H]<sup>+</sup>) 291.1385; found 291.1380.</p>      |
| 11 |  <p style="text-align: center;">4c</p> <p style="text-align: center;"><b>7-methoxy-1-(1-(4-methoxyphenyl)vinyl)naphthalen-2-ol</b></p> | <p>White solid (84mg, 95% yield); Mp: 119-120 °C; <sup>1</sup>H NMR (500 MHz, CDCl<sub>3</sub>) δ 7.60 (dd, <i>J</i> = 16.0, 9.0 Hz, 2H), 7.22 (d, <i>J</i> = 9.0 Hz, 2H), 7.03 (d, <i>J</i> = 9.0 Hz, 1H), 6.86 (dd, <i>J</i> = 9.0 Hz, 2.5 Hz, 1H), 6.70 (d, <i>J</i> = 9.0 Hz, 3H), 6.10 (s, 1H), 5.62 (s, 1H), 5.32 (s, 1H), 3.68 (s, 3H), 3.57 (s, 3H). <sup>13</sup>C{<sup>1</sup>H} NMR (125 MHz, CDCl<sub>3</sub>) δ 159.9, 158.1, 151.0, 142.19, 134.0, 131.3, 129.5, 129.2, 127.7, 124.2, 119.5, 116.7, 115.5, 114.7, 114.0, 104.0, 55.3, 55.0.</p> <p><b>HRMS (ESI-Orbitrap) m/z:</b> Calcd. for C<sub>20</sub>H<sub>18</sub>O<sub>3</sub>([M+H]<sup>+</sup>) 307.1334; found 307.1338.</p> |
| 12 |  <p style="text-align: center;">4d</p> <p style="text-align: center;"><b>6-bromo-1-(1-(p-tolyl)vinyl)naphthalen-2-ol</b></p>          | <p>Yellow oil (64 mg, 85% yield);</p> <p><sup>1</sup>H NMR (500 MHz, CDCl<sub>3</sub>) δ 7.84 (s, 1H), 7.60 – 7.61 (d, <i>J</i> = 9.0 Hz, 1H), 7.25 -7.31 (m, 2H), 7.19 – 7.21 (d, <i>J</i> = 9.0 Hz, 1H), 7.12 - 7.13 (d, <i>J</i> = 8.5 Hz, 2H), 6.99 - 7.01 (d, <i>J</i> = 8.0 Hz, 2H), 6.20 (s, 1H), 5.58 (s, 1H), 5.36 (s, 1H), 2.23 (s, 3H). <sup>13</sup>C{<sup>1</sup>H} NMR (125 MHz, CDCl<sub>3</sub>) δ 150.7, 141.8, 138.8, 135.60, 131.3, 130.0, 129.9, 129.7, 129.5, 128.6, 126.8, 126.1, 120.4, 118.5, 118.2, 117.1, 21.2.</p> <p><b>HRMS (ESI-Orbitrap) m/z:</b> Calcd. for C<sub>19</sub>H<sub>15</sub>BrO([M+Na]<sup>+</sup>) 361.0204 ; found 362.1155</p>                          |

|    |                                                                                                                                                                                                                 |                                                                                                                                                                                                                                                                                                                                                                                                                                                                                                                                                                                                                                                                                     |
|----|-----------------------------------------------------------------------------------------------------------------------------------------------------------------------------------------------------------------|-------------------------------------------------------------------------------------------------------------------------------------------------------------------------------------------------------------------------------------------------------------------------------------------------------------------------------------------------------------------------------------------------------------------------------------------------------------------------------------------------------------------------------------------------------------------------------------------------------------------------------------------------------------------------------------|
| 13 | 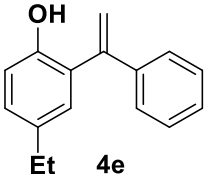 <p style="text-align: center;"><b>4e</b></p> <p style="text-align: center;"><b>4-ethyl-2-(1-phenylvinyl)phenol</b></p>        | <p>Colourless liquid (55 mg, 51% yield); <sup>1</sup>H NMR (500 MHz, CDCl<sub>3</sub>) δ 7.21 - 7.23 (m, 2H), 7.09 - 7.10 (d, <i>J</i> = 8.0 Hz, 2H), 7.02 - 7.04 (m, 1H), 6.91 (s, 1H), 6.81 - 6.82 (d, <i>J</i> = 8.0 Hz, 1H), 5.76 (s, 1H), 5.30 (s, 1H), 4.96 (s, 1H), 2.47 - 2.51 (q, 2H), 2.30 (s, 3H), 1.12 - 1.15 (t, <i>J</i> = 7.5 Hz, 3H). <sup>13</sup>C NMR (125 MHz, CDCl<sub>3</sub>) δ 151.04, 145.29, 138.60, 136.59, 136.12, 129.57, 129.42, 128.73, 127.41, 127.00, 115.70, 115.58, 77.28, 77.03, 76.78, 27.96, 21.21, 15.85.</p> <p><b>HRMS (ESI-Orbitrap) m/z:</b> Calcd. for C<sub>16</sub>H<sub>16</sub>O([M+Na]<sup>+</sup>) 225.1279 ; found 225.1283.</p> |
| 14 |  <p style="text-align: center;"><b>4f</b></p> <p style="text-align: center;"><b>4-methoxy-2-(1-phenylvinyl)phenol</b></p>      | <p>Viscous liquid (46 mg, 50% yield); <sup>1</sup>H NMR (500 MHz, CDCl<sub>3</sub>) δ 7.33 - 7.38 (m, 5H), 6.87 (d, <i>J</i> = 9.0 Hz, 1H), 6.81 - 6.84 (m, 1H), 6.639 (d, <i>J</i> = 2.5 Hz, 1H), 5.86 (s, 1H), 5.42 (s, 1H), 4.78 (s, 1H), 3.74 (s, 3H). <sup>13</sup>C{<sup>1</sup>H} NMR (125 MHz, CDCl<sub>3</sub>) δ 153.3, 147.1, 145.3, 139.1, 128.7, 128.6, 128.1, 127.0, 116.7, 116.5, 115.3, 115.1, 55.7.</p> <p><b>HRMS (ESI-Orbitrap) m/z:</b> Calcd. for C<sub>15</sub>H<sub>14</sub>O<sub>2</sub>([M+H]<sup>+</sup>) 227.1072; found 227.1068.</p>                                                                                                                   |
| 15 |  <p style="text-align: center;"><b>4g</b></p> <p style="text-align: center;"><b>4-methoxy-2-(1-(p-tolyl)vinyl)phenol</b></p> | <p>Viscous liquid (53mg, 55% yield); <sup>1</sup>H NMR (500 MHz, CDCl<sub>3</sub>) δ 7.17 - 7.20 (d, <i>J</i> = 3.0 Hz, 2H), 7.06 - 7.07 (d, <i>J</i> = 8.0 Hz, 2H), 6.78 - 6.80 (d, <i>J</i> = 4.0 Hz, 2H), 6.73 - 6.75 (dd, <i>J</i> = 7.0, 3.0 Hz, 1H), 6.25 - 6.31 (d, <i>J</i> = 3.0 Hz, 1H) 5.73 (s, 1H), 5.28 (s, 1H), 4.73 (s, 1H), 3.69 (s, 3H), 2.27 (s, 3H). <sup>13</sup>C{<sup>1</sup>H} NMR (125 MHz, CDCl<sub>3</sub>) δ 153.3, 147.1, 145.1, 138.69, 136.2, 129.4, 128.2, 126.9, 116.5, 115.9, 115.2, 115.0, 55.7, 21.2.</p> <p><b>HRMS (ESI-Orbitrap) m/z:</b> Calcd. for C<sub>16</sub>H<sub>16</sub>O<sub>2</sub>([M+H]<sup>+</sup>)</p>                         |
| 16 |                                                                                                                                                                                                                 | <p>Colourless liquid (53 mg, 51% yield); <sup>1</sup>H NMR (500 MHz, CDCl<sub>3</sub>) δ 7.18 - 7.20 (d, <i>J</i> = 7.5 Hz, 2H), 7.06 - 7.08 (d, <i>J</i> = 8.0 Hz, 2H), 6.96 - 6.98 (dd, <i>J</i> = 8.5 Hz, 3 Hz, 1H), 6.87 (s,</p>                                                                                                                                                                                                                                                                                                                                                                                                                                                |

|    |                                                                                                                                             |                                                                                                                                                                                                                                                                                                                                                                                                                                                                                                                                                                                                                                                                                                                                                                                                                        |
|----|---------------------------------------------------------------------------------------------------------------------------------------------|------------------------------------------------------------------------------------------------------------------------------------------------------------------------------------------------------------------------------------------------------------------------------------------------------------------------------------------------------------------------------------------------------------------------------------------------------------------------------------------------------------------------------------------------------------------------------------------------------------------------------------------------------------------------------------------------------------------------------------------------------------------------------------------------------------------------|
|    | 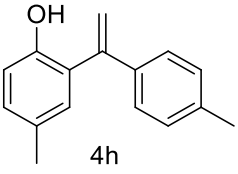 <p><b>4-methyl-2-(1-(p-tolyl)vinyl)phenol</b></p>         | <p>1H), 6.76 - 6.77 (d, <math>J = 8.0</math> Hz, 1H), 5.72 (s, 1H), 5.27 (s, 1H), 4.93 (s, 1H), 2.28 (s, 3H), 2.20 (s, 3H).</p> <p><math>^{13}\text{C}\{^1\text{H}\}</math> NMR (125 MHz, <math>\text{CDCl}_3</math>) <math>\delta</math> 150.8, 145.2, 138.5, 136.6, 130.6, 129.9, 129.5, 129.4, 127.4, 126.99, 115.7, 115.5, 21.1, 20.4.</p> <p>HRMS (ESI-Orbitrap) <math>m/z</math>: Calcd. for <math>\text{C}_{16}\text{H}_{16}\text{O}([\text{M}+\text{H}]^+)</math> 225.1279 ; found 225.1279.</p>                                                                                                                                                                                                                                                                                                               |
| 17 |  <p><b>3-(1-(p-tolyl)vinyl)-[1,1'-biphenyl]-4-ol</b></p>   | <p>Colourless liquid (59 mg, 50% yield); <math>^1\text{H}</math> NMR (500 MHz, <math>\text{CDCl}_3</math>) <math>\delta</math> 7.46 - 7.48 (d, <math>J = 7.5</math> Hz, 2H), 7.42 - 7.43 (d, <math>J = 8.5</math> Hz, 1H), 7.30 - 7.33 (m, 3H), 7.21 - 7.24 (m, 2H), 7.18 (s, 1H), 7.08 - 7.09 (d, <math>J = 7.5</math> Hz), 6.94 - 6.95 (d, <math>J = 8.0</math> Hz, 1H), 5.79 (s, 1H), 5.35 (s, 1H), 5.13 (s, 1H), 2.28 (s, 3H);</p> <p><math>^{13}\text{C}</math> NMR (125 MHz, DMSO) <math>\delta</math> 152.76, 145.03, 140.60, 138.79, 136.31, 133.61, 129.51, 129.00, 128.72, 128.08, 127.02, 126.74, 116.23, 116.08, 77.28, 77.03, 76.78, 21.21.</p> <p>HRMS (ESI-Orbitrap) <math>m/z</math>: Calcd. for <math>\text{C}_{21}\text{H}_{18}\text{O}([\text{M}+\text{H}]^+)</math> 287.1436 ; found 287.1441.</p> |
| 18 |  <p><b>4-(tert-butyl)-2-(1-(p-tolyl)vinyl)phenol</b></p> | <p>Pale yellow liquid (46 mg, 52% yield); <math>^1\text{H}</math> NMR (500 MHz, <math>\text{CDCl}_3</math>) <math>\delta</math> 7.19 - 7.20 (m, 3H), 7.06 - 7.08 (m, 3H), 6.78 - 6.80 (d, <math>J = 8.5</math> Hz, 1H), 5.74 (s, 1H), 5.27 (s, 1H), 4.93 (s, 1H), 2.28 (s, 3H), 1.21 (s, 9H).</p> <p><math>^{13}\text{C}\{^1\text{H}\}</math> NMR (125 MHz, <math>\text{CDCl}_3</math>) <math>\delta</math> 150.78, 145.49, 143.11, 138.59, 136.49, 129.42, 127.22, 126.96, 126.30, 115.64, 115.18, 34.10, 31.55, 21.21.</p> <p>HRMS (ESI-Orbitrap) <math>m/z</math>: Calcd. for <math>\text{C}_{19}\text{H}_{22}\text{O}([\text{M}+\text{H}]^+)</math> 267.1748; found 267.1753</p>                                                                                                                                   |
| 19 |                                                                                                                                             | <p>Colourless liquid (51 mg, 55% yield); <math>^1\text{H}</math> NMR (500 MHz, <math>\text{CDCl}_3</math>) <math>\delta</math> 7.19 - 7.21 (m, 2H), 7.07 - 7.09 (d, <math>J = 8.0</math> Hz, 2H), 7.04 - 7.06 (dd, <math>J = 8.5, 2.5</math> Hz, 1H), 6.91 (d, <math>J = 2.0</math> Hz, 1H), 6.79 - 6.80 (d, <math>J = 8.0</math> Hz, 1H), 5.75 (s, 1H), 5.29 (s,</p>                                                                                                                                                                                                                                                                                                                                                                                                                                                  |

|    |                                                                                                                                                         |                                                                                                                                                                                                                                                                                                                                                                                                                                                                                                                                                                                                      |
|----|---------------------------------------------------------------------------------------------------------------------------------------------------------|------------------------------------------------------------------------------------------------------------------------------------------------------------------------------------------------------------------------------------------------------------------------------------------------------------------------------------------------------------------------------------------------------------------------------------------------------------------------------------------------------------------------------------------------------------------------------------------------------|
|    | 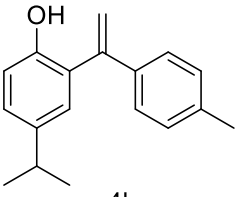 <p>4k</p> <p><b>4-isopropyl-2-(1-(p-tolyl)vinyl)phenol</b></p>        | <p>1H), 4.94 (s, 1H), 2.72 - 2.80 (sept, 1H), 2.29 (s, 3H), 1.15 (s, 3H), 1.14 (s, 3H).</p> <p><sup>13</sup>C{<sup>1</sup>H} NMR (125 MHz, CDCl<sub>3</sub>) δ 151.0, 145.3, 140.7, 138.59, 136.5, 129.4, 128.2, 127.3, 127.2, 126.9, 115.6, 115.5, 33.2, 24.2, 21.2.</p> <p>HRMS (ESI-Orbitrap) m/z: Calcd. for C<sub>18</sub>H<sub>20</sub>O ([M+H]<sup>+</sup>) 253.1592; found 253.1588</p>                                                                                                                                                                                                      |
| 20 |  <p>4k</p> <p><b>3,5-di-tert-butyl-2-(1-(p-tolyl)vinyl)phenol</b></p>  | <p>Viscous liquid (46 mg, 60% yield); <sup>1</sup>H NMR (500 MHz, CDCl<sub>3</sub>) δ 7.21 - 7.22 (d, J = 8.0 Hz, 2H), 7.09 - 7.12 (m, 3H), 6.92 (d, J = 2.0 Hz, 1H), 6.21 (s, 1H), 5.38 - 5.39 (d, J = 4.5 Hz, 1H), 2.32 (s, 3H), 1.34 (s, 9H), 1.32 (s, 9H).</p> <p><sup>13</sup>C{<sup>1</sup>H} NMR (125 MHz, CDCl<sub>3</sub>) δ 152.6, 151.4, 148.1, 145.18, 138.2, 136.5, 129.3, 126.1, 123.2, 118.1, 116.3, 109.8, 77.2, 77.0, 76.7, 37.1, 34.8, 32.3, 31.3, 21.1.</p> <p>HRMS (ESI-Orbitrap) m/z: Calcd. for C<sub>23</sub>H<sub>30</sub>O ([M+H]<sup>+</sup>) 323.2374; found 323.2374</p> |
| 21 |  <p>6a</p> <p><b>(E)-1-(2-iodo-1-phenylvinyl)naphthalen-2-ol</b></p> | <p>Viscous liquid (96 mg, 74% yield); <sup>1</sup>H NMR (500 MHz, CDCl<sub>3</sub>) δ 7.29-7.78 (m, 2H), 7.36 (s, 1H), 7.40 (d, J = 8.5 Hz, 1H), 7.5-7.28 (m, 7H), 5.18 (s, 1H). <sup>13</sup>C{<sup>1</sup>H} NMR (125 MHz, CDCl<sub>3</sub>) δ 149.4, 146.8, 138.6, 131.5, 130.4, 129.1, 128.9, 128.8, 128.2, 127.0, 126.4, 124.0, 123.7, 121.1, 117.6, 86.0.</p> <p>HRMS (ESI-Orbitrap) m/z: Calcd. for C<sub>18</sub>H<sub>13</sub>IO ([M+H]<sup>+</sup>) 373.0089; found 373.0091</p>                                                                                                           |
| 22 |  <p>7a</p> <p><b>1-phenylnaphtho[2,1-b]furan</b></p>                 | <p>Colourless liquid (55 mg, 65% yield); <sup>1</sup>H NMR (500 MHz, CDCl<sub>3</sub>) δ 8.08 (d, J = 8.5 Hz, 1H), 7.99 (d, J = 9.0 Hz, 1H), 7.82 (d, J = 9.0 Hz, 1H), 7.33 - 7.76 (m, 2H), 7.67 (d, J = 7.5 Hz, 2H), 7.52-7.58 (m, 3H), 7.47-7.50 (m, 1H), 7.40 (t, J = 7.5 Hz, 1H). <sup>13</sup>C{<sup>1</sup>H} NMR (125 MHz, CDCl<sub>3</sub>) δ 153.1, 141.7, 133.1, 130.8, 129.8, 128.9, 128.6, 128.3, 127.8, 125.9, 125.9, 124.4, 124.3, 123.3, 120.7, 112.6. HRMS</p>                                                                                                                       |

|    |                                                                                                                                            |                                                                                                                                                                                                                                                                                                                                                                                                                                                                                                                                                                                                                                                        |
|----|--------------------------------------------------------------------------------------------------------------------------------------------|--------------------------------------------------------------------------------------------------------------------------------------------------------------------------------------------------------------------------------------------------------------------------------------------------------------------------------------------------------------------------------------------------------------------------------------------------------------------------------------------------------------------------------------------------------------------------------------------------------------------------------------------------------|
|    |                                                                                                                                            | (ESI-Orbitrap) m/z: Calcd. for C <sub>18</sub> H <sub>12</sub> O([M+H] <sup>+</sup> ) 245.0966; found 245.0968                                                                                                                                                                                                                                                                                                                                                                                                                                                                                                                                         |
| 23 | 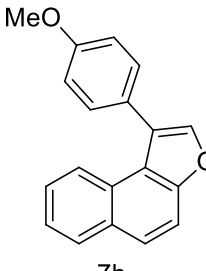 <p>7b</p> <p>1-(4-methoxyphenyl)naphtho[2,1-b]furan</p>  | <p>Yellow liquid (65 mg, 68% yield); <sup>1</sup>H NMR (500 MHz, CDCl<sub>3</sub>) δ 7.91 (d, J = 8.0 Hz, 1H), 7.81 (d J = 8.5 Hz, 1H), 7.63 (d, J = 9.0 Hz, 1H), 7.57 (d, J = 9.0 Hz, 1H), 7.53 (s, 1H), 7.39 (d, J = 7.5 Hz), 7.32 (t, J = 7.5 Hz, 1H), 7.26 (t, J = 7.5 Hz, 1H), 6.92 (d, J = 7.5 Hz, 1H), 3.78 (s, 3H). <sup>13</sup>C{<sup>1</sup>H} NMR (125 MHz, CDCl<sub>3</sub>) δ 159.3, 153.0, 141.5, 133.5, 130.9, 130.7, 128.8, 128.3, 125.9, 125.8, 125.1, 124.2, 123.9, 123.3, 120.9, 114.0, 112.6, 55.3. HRMS (ESI-Orbitrap) m/z: Calcd. for C<sub>19</sub>H<sub>14</sub>O<sub>2</sub>([M+H]<sup>+</sup>) 275.1072; found 272.1072</p> |
| 24 |  <p>7c</p> <p>1-(thiophen-3-yl)naphtho[2,1-b]furan</p>   | <p>Pale yellow liquid (54 mg, 62% yield); <sup>1</sup>H NMR (500 MHz, CDCl<sub>3</sub>) δ 8.10 (d, J = 8.0 Hz), 7.97 (d, J = 8.0 Hz, 1H), 7.79 (d, J = 9.0 Hz, 1H), 7.70 – 7.73 (m, 2H), 7.42 – 7.54 (m, 4H), 7.37 (d, J = 5.0 Hz, 1H). <sup>13</sup>C{<sup>1</sup>H} NMR (125 MHz, CDCl<sub>3</sub>) δ 153.0, 141.8, 132.7, 130.7, 129.3, 128.8, 128.3, 126.1, 126.0, 125.9, 124.4, 123.8, 123.3, 120.9, 119.0, 112.6. HRMS (ESI-Orbitrap) m/z: Calcd. for C<sub>18</sub>H<sub>10</sub>OS([M+H]<sup>+</sup>) 251.0530; found 251.0525</p>                                                                                                             |
| 25 |  <p>7d</p> <p>1-(4-propylphenyl)naphtho[2,1-b]furan</p> | <p>Colourless liquid (68 mg, 68% yield); <sup>1</sup>H NMR (500 MHz, CDCl<sub>3</sub>) δ 8.09 (d, J = Hz, 1H), 9.97 (d, J = 8.0 Hz), 7.95 (d, J = 9.0 Hz), 7.69 -7.73 (m, 2H), 7.56 (d, J = 8.0 Hz, 1H), 7.44 -7.47 (m, 1H), 7.39 (t, J = 7.5 Hz, 2H), 2.74 (t, J = 7.5 Hz, 2H), 1.75 -1.82 (sext, 2H), 1.06 (t, J = 7.5 Hz, 3H). <sup>13</sup>C{<sup>1</sup>H} NMR (125 MHz, CDCl<sub>3</sub>) δ 153.1, 142.4, 141.6, 130.8, 130.2, 129.7, 128.8, 128.6, 128.4, 125.9, 125.8, 124.4, 124.3, 123.4, 120.8, 112.6, 37.9, 24.5, 13.9. HRMS (ESI-Orbitrap) m/z: Calcd. for C<sub>21</sub>H<sub>18</sub>O([M+H]<sup>+</sup>) 287.1435; found 287.1444</p>  |



|    |                                                                                                                                                                                                         |                                                                                                                                                                                                                                                                                                                                                                                                                                                                                                                                                                                                                                                                  |
|----|---------------------------------------------------------------------------------------------------------------------------------------------------------------------------------------------------------|------------------------------------------------------------------------------------------------------------------------------------------------------------------------------------------------------------------------------------------------------------------------------------------------------------------------------------------------------------------------------------------------------------------------------------------------------------------------------------------------------------------------------------------------------------------------------------------------------------------------------------------------------------------|
| 26 | 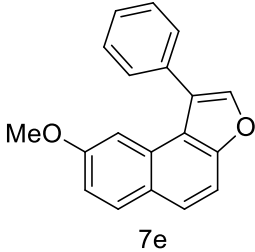 <p style="text-align: center;">7e</p> <p style="text-align: center;"><b>8-methoxy-1-phenylnaphtho[2,1-b]furan</b></p> | <p>Yellow liquid (59 mg, 62% yield); <b><sup>1</sup>H NMR (500 MHz, CDCl<sub>3</sub>)</b> δ 7.84(d, <i>J</i> = 10 Hz, 1H), 7.71 (d, <i>J</i> = 10 Hz, 2H), 7.64(d, <i>J</i> = 5 Hz, 2H), 7.51 – 7.57 (m, 3H), 7.45 – 7.48 (m, 1H), 7.30 (s, 1H), 7.08 (d, <i>J</i> = 10 Hz, 1H), 3.57 (s, 3H).</p> <p><b><sup>13</sup>C{<sup>1</sup>H} NMR (125 MHz, CDCl<sub>3</sub>)</b> δ 157.74, 153.62, 141.13, 133.13, 130.26, 130.09, 129.46, 128.41, 127.88, 125.70, 125.66, 124.22, 120.11, 116.35, 110.12, 102.87, 54.86.</p> <p><b>HRMS (ESI-Orbitrap) m/z:</b> Calcd. for C<sub>19</sub>H<sub>14</sub>O<sub>2</sub> ([M+H]<sup>+</sup>) 275.1072; found 275.1075</p> |
|----|---------------------------------------------------------------------------------------------------------------------------------------------------------------------------------------------------------|------------------------------------------------------------------------------------------------------------------------------------------------------------------------------------------------------------------------------------------------------------------------------------------------------------------------------------------------------------------------------------------------------------------------------------------------------------------------------------------------------------------------------------------------------------------------------------------------------------------------------------------------------------------|

#### 4. $^1\text{H}$ and $^{13}\text{C}\{^1\text{H}\}$ spectrum of synthesised compounds

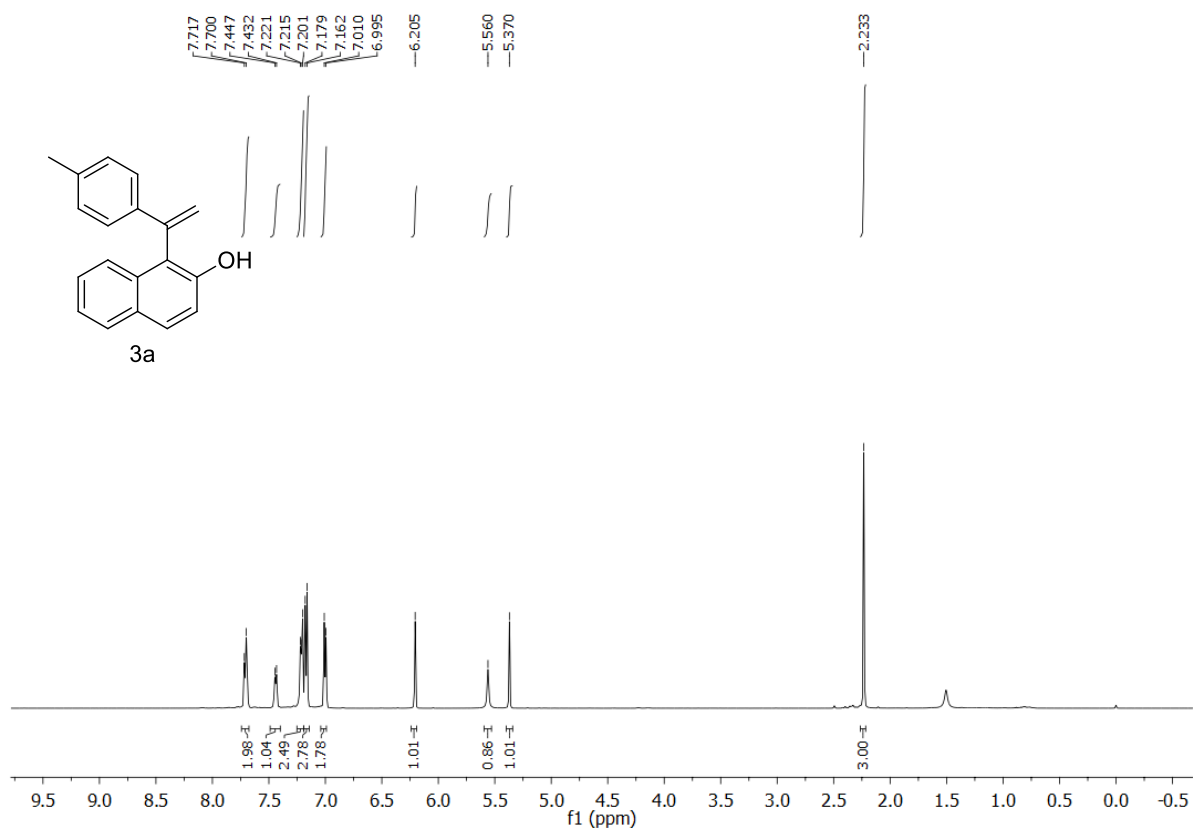

$^1\text{H}$  NMR of 3a in  $\text{CDCl}_3$

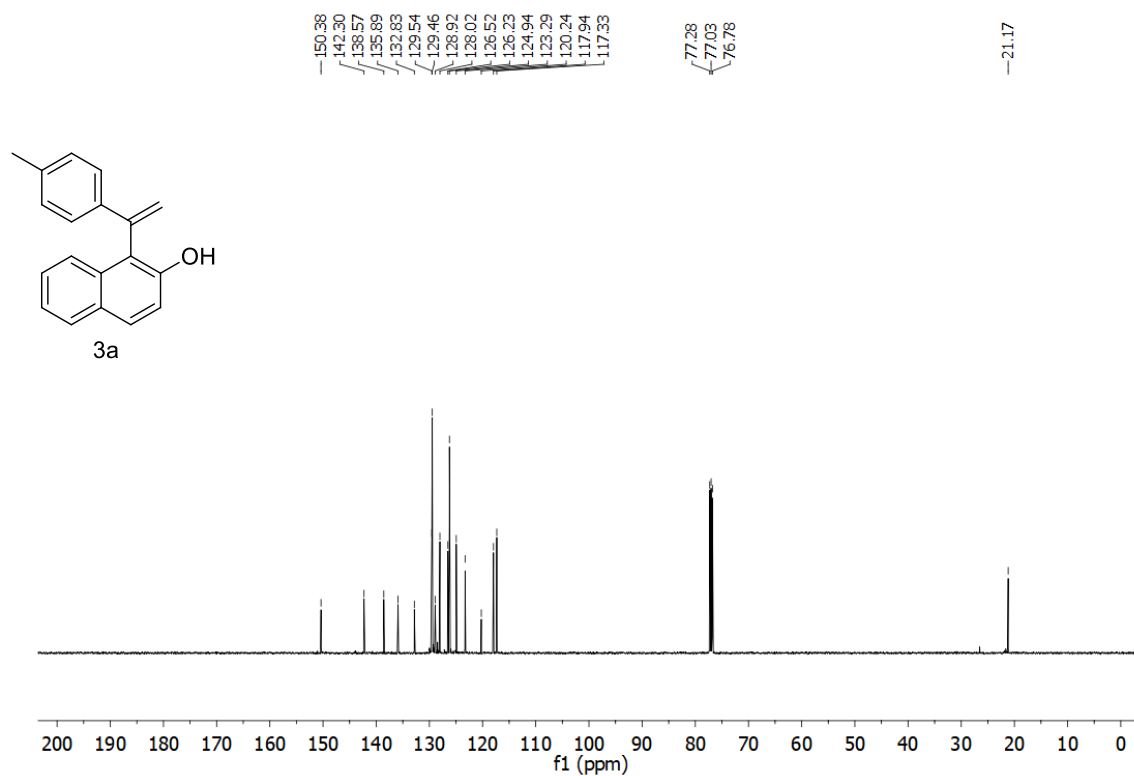

$^{13}\text{C}\{^1\text{H}\}$  NMR of 3a in  $\text{CDCl}_3$

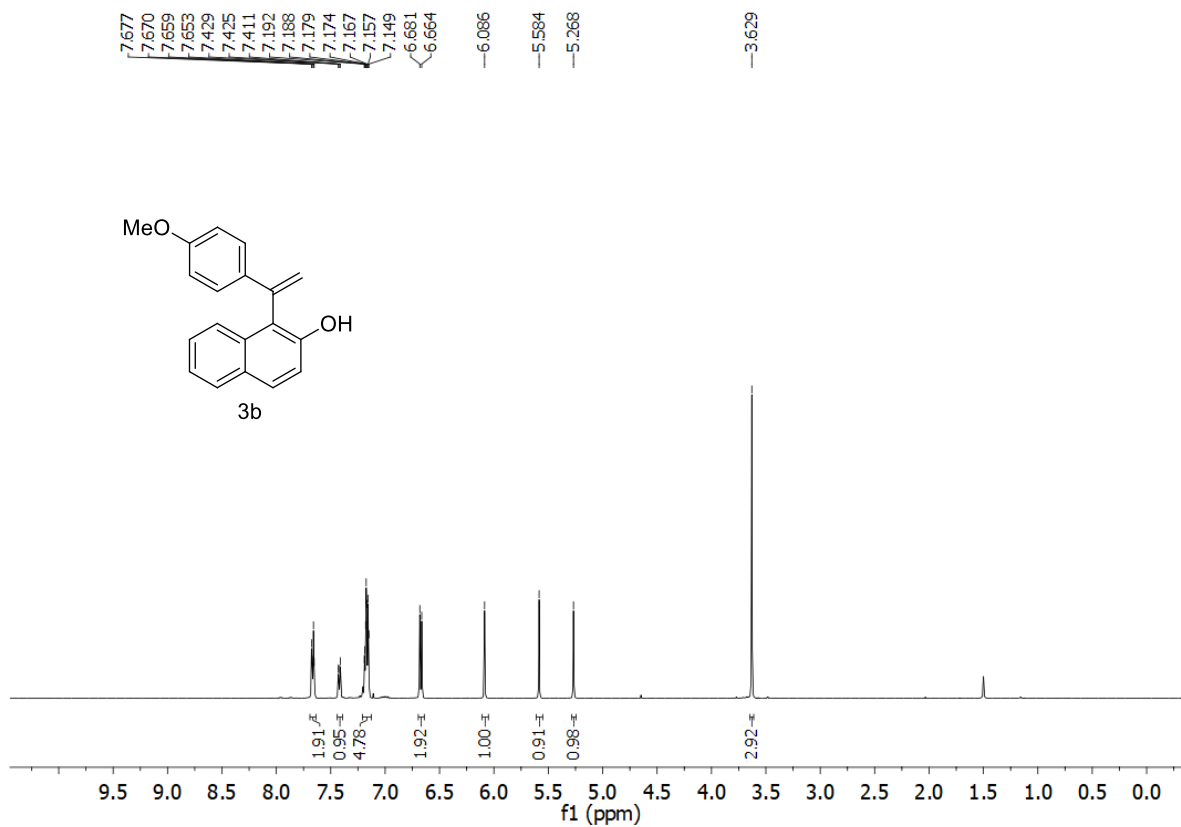

<sup>1</sup>H NMR of 3b in CDCl<sub>3</sub>

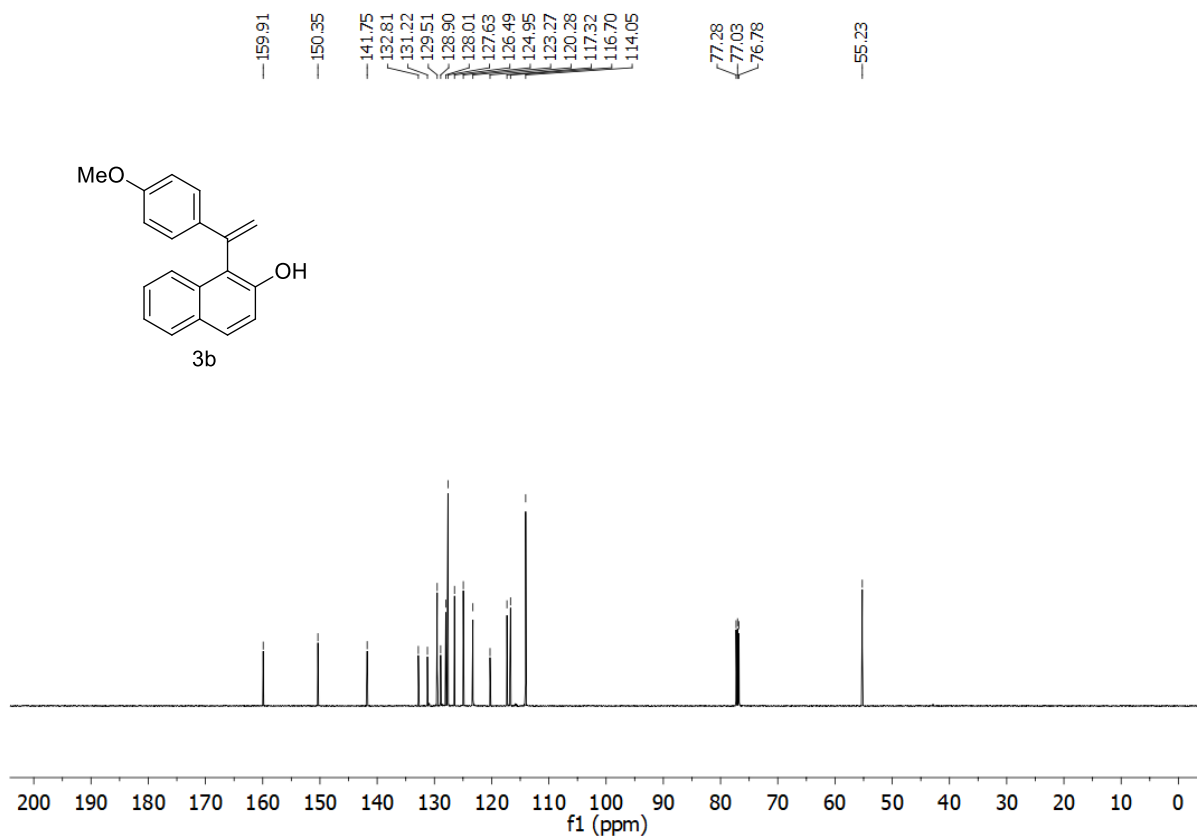

<sup>13</sup>C{<sup>1</sup>H} NMR of 3b in CDCl<sub>3</sub>

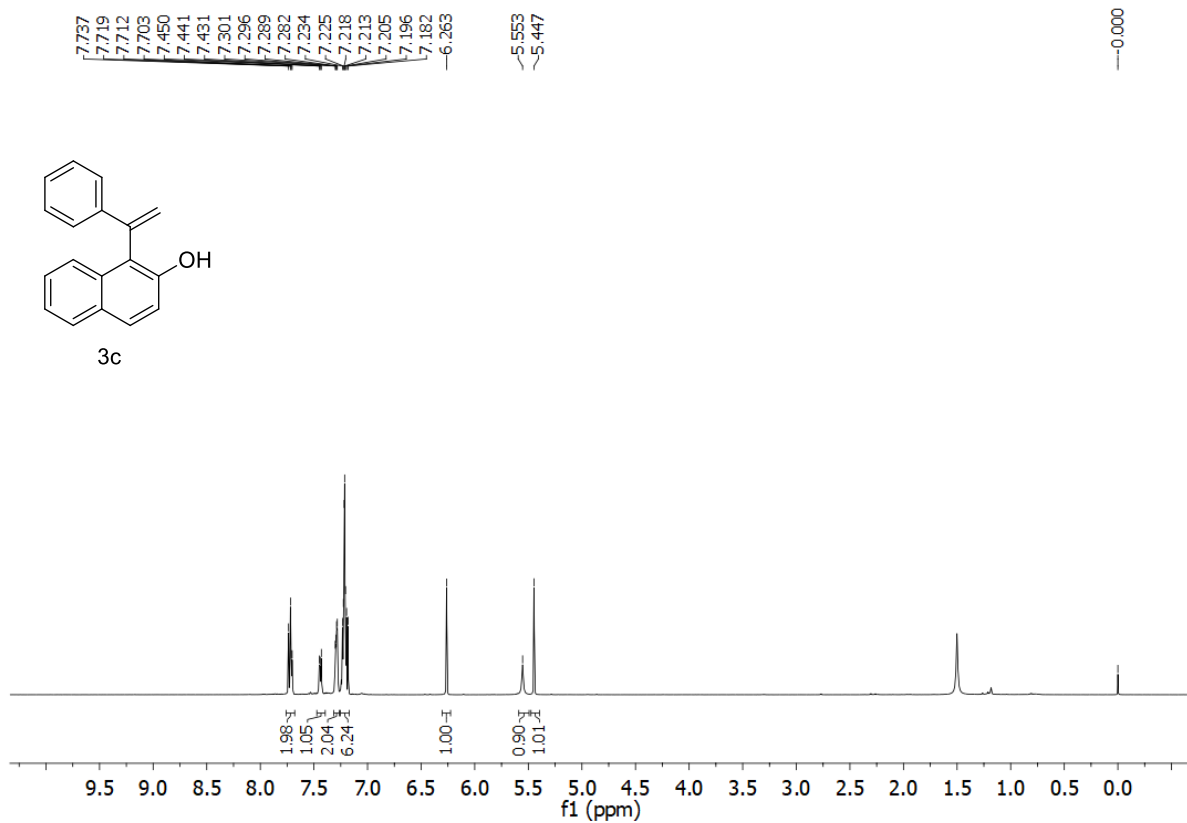

$^1\text{H}$  NMR of 3c in  $\text{CDCl}_3$

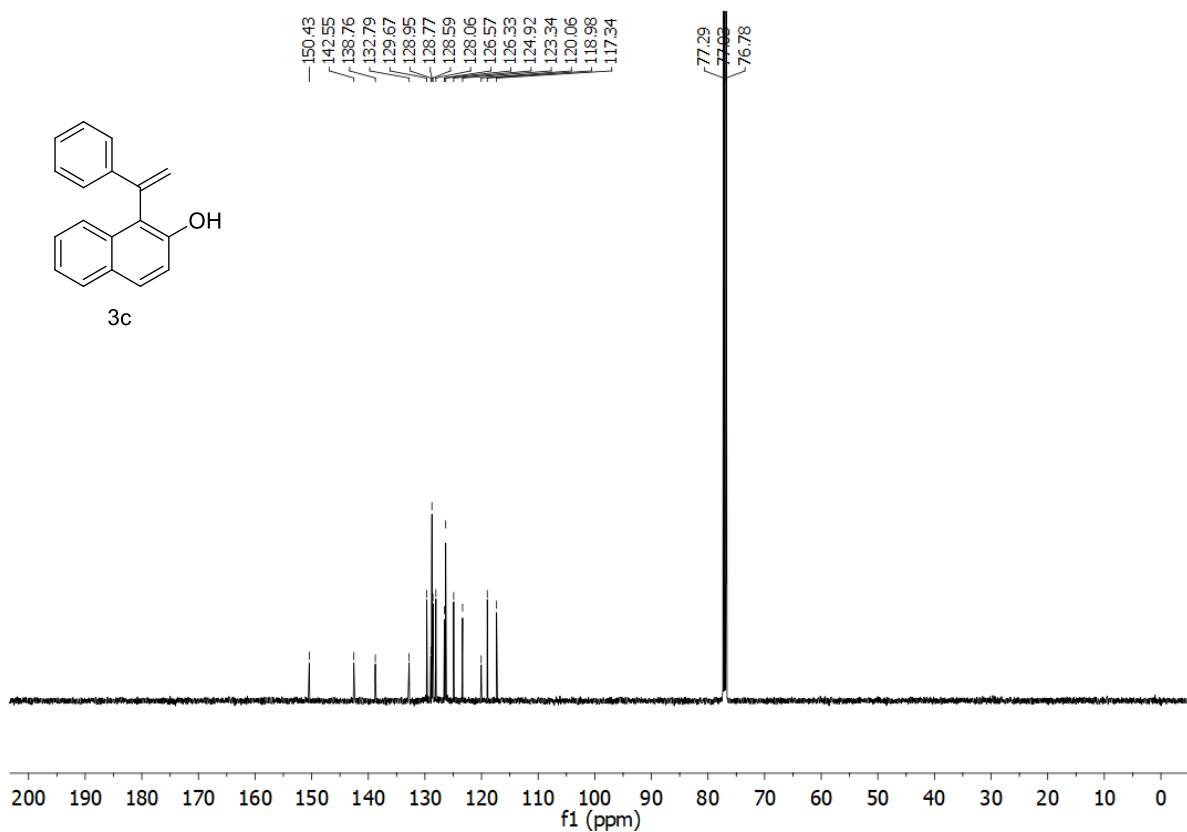

$^{13}\text{C}\{^1\text{H}\}$  NMR of 3c in  $\text{CDCl}_3$

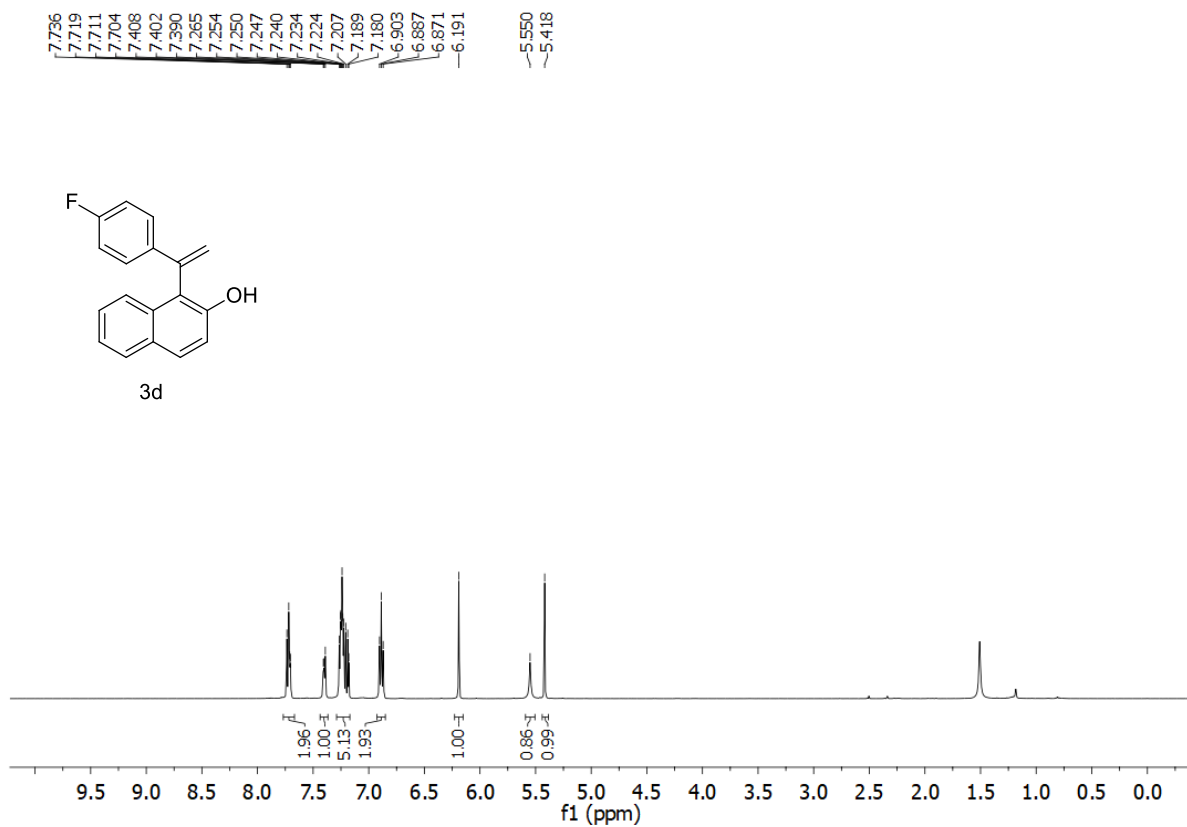

$^1\text{H}$  NMR of 3d in  $\text{CDCl}_3$

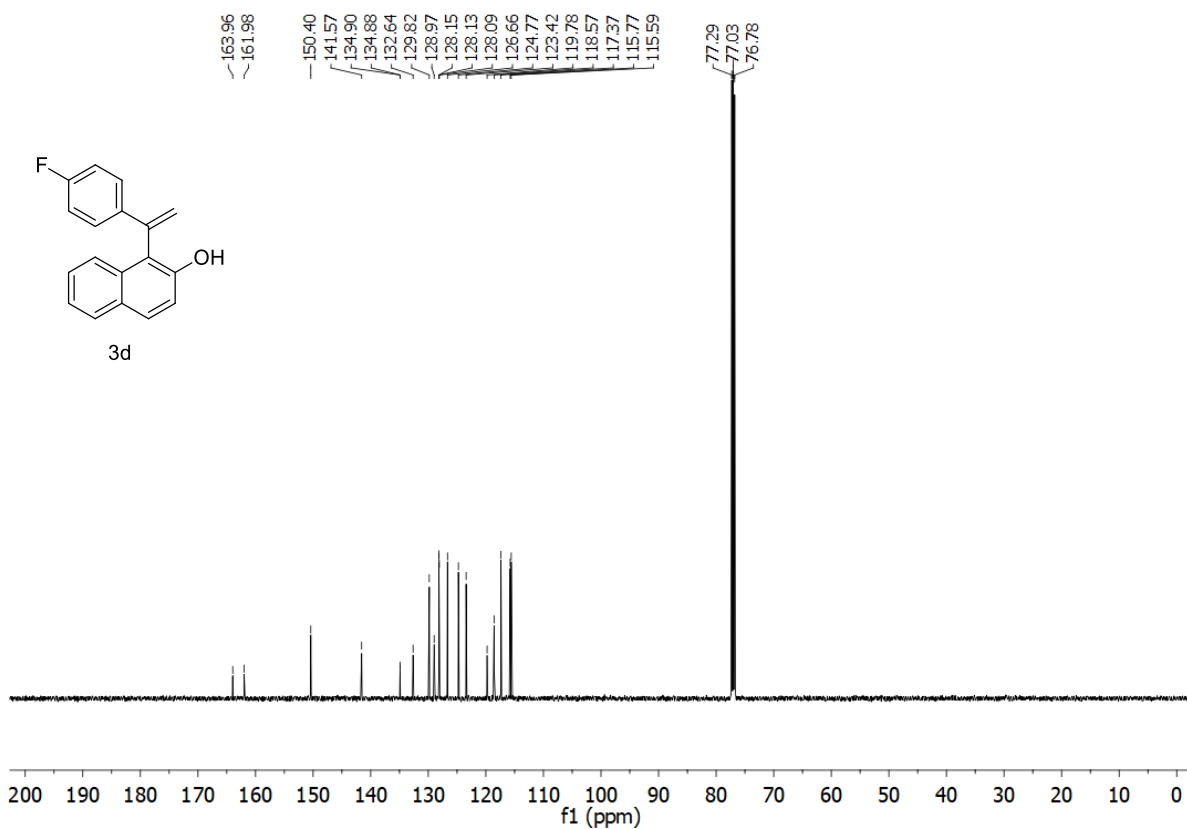

$^{13}\text{C}\{^1\text{H}\}$  NMR of 3d in  $\text{CDCl}_3$

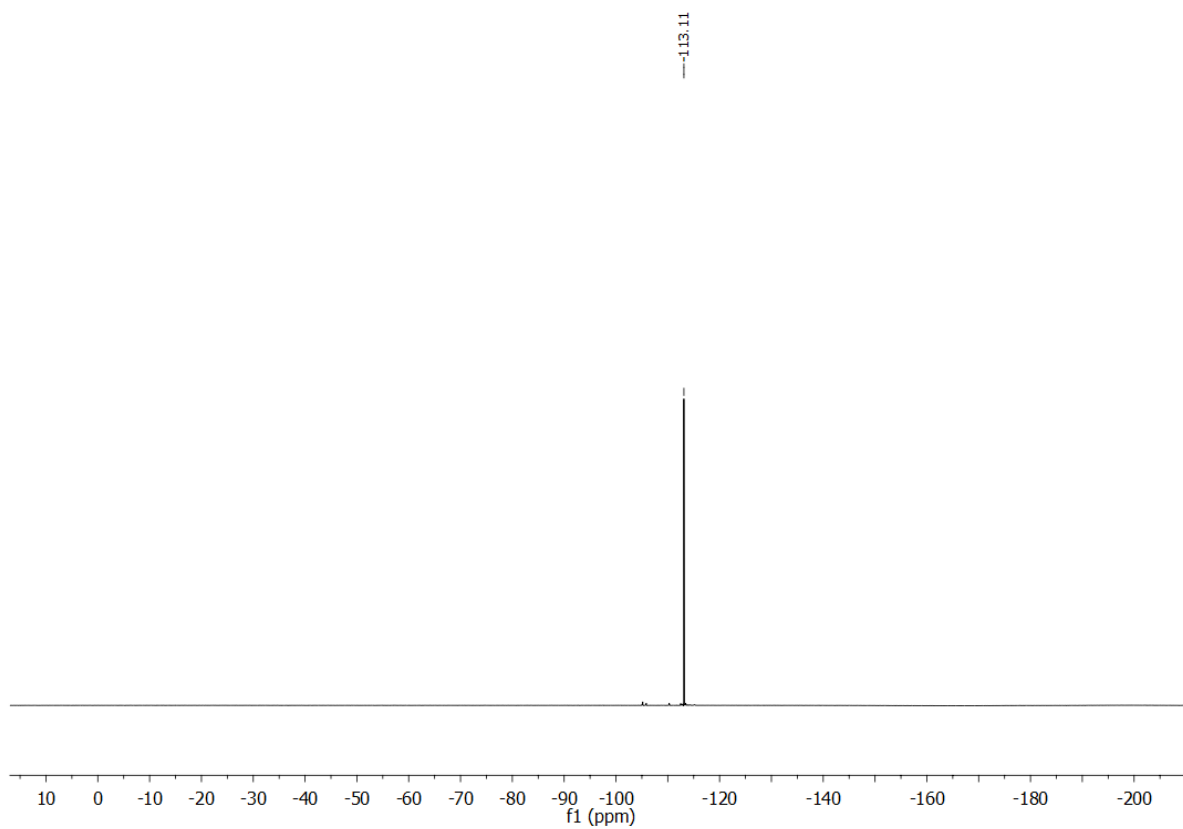

**<sup>19</sup>F NMR of 3d in CDCl<sub>3</sub>**

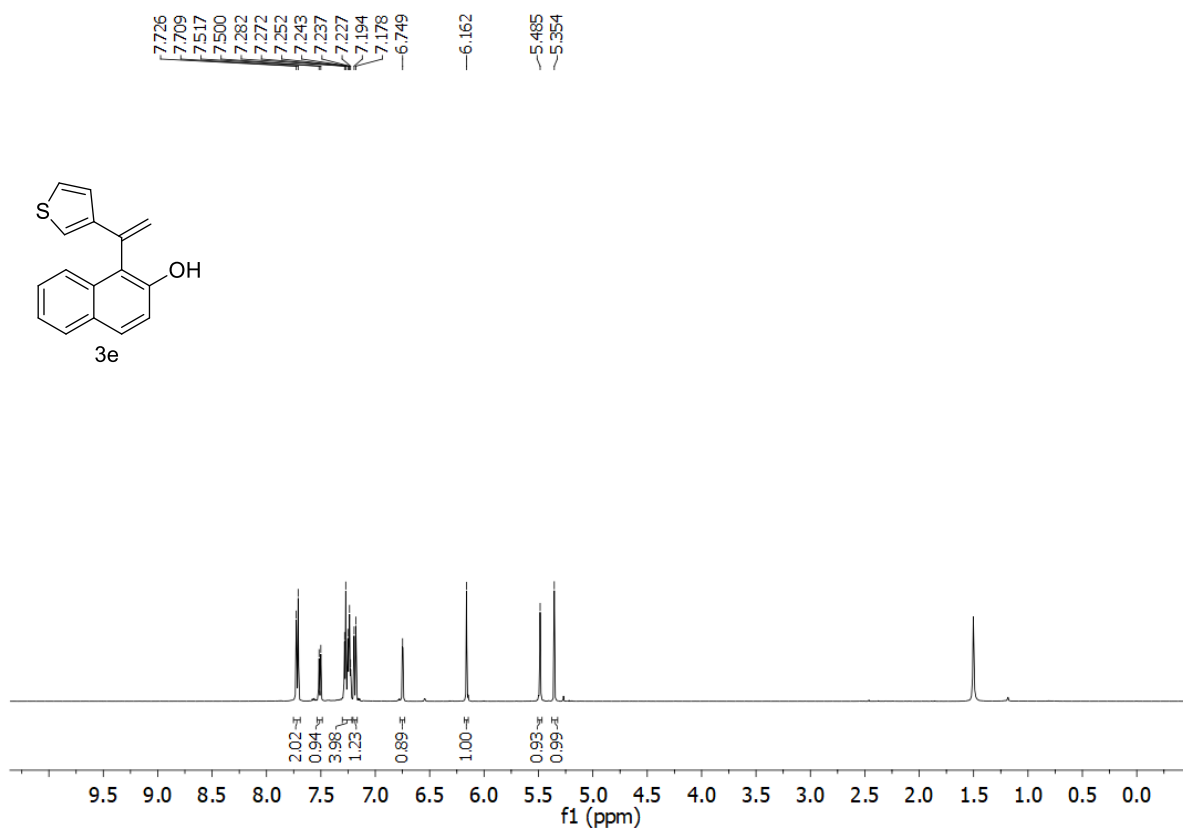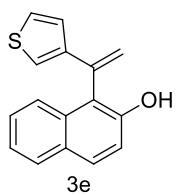

**<sup>1</sup>H NMR of 3e in CDCl<sub>3</sub>**

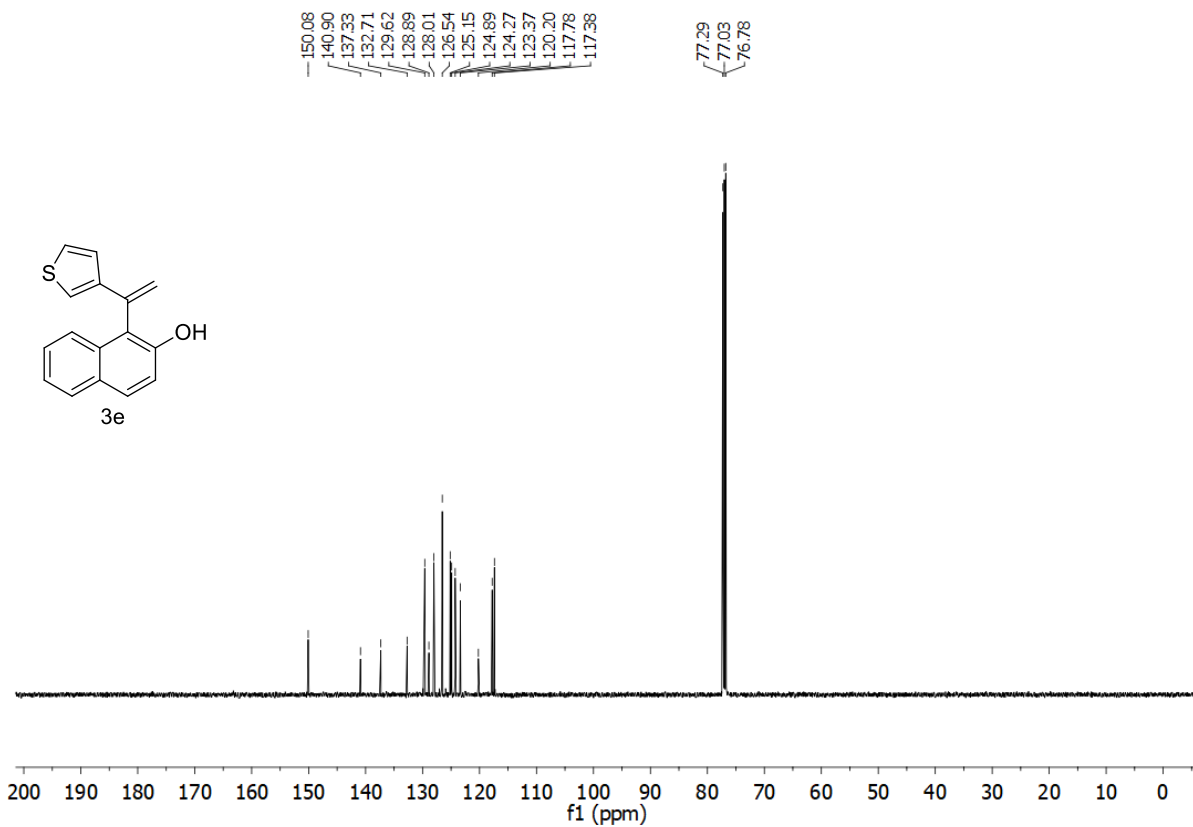

$^{13}\text{C}\{^1\text{H}\}$  NMR of 3e in  $\text{CDCl}_3$

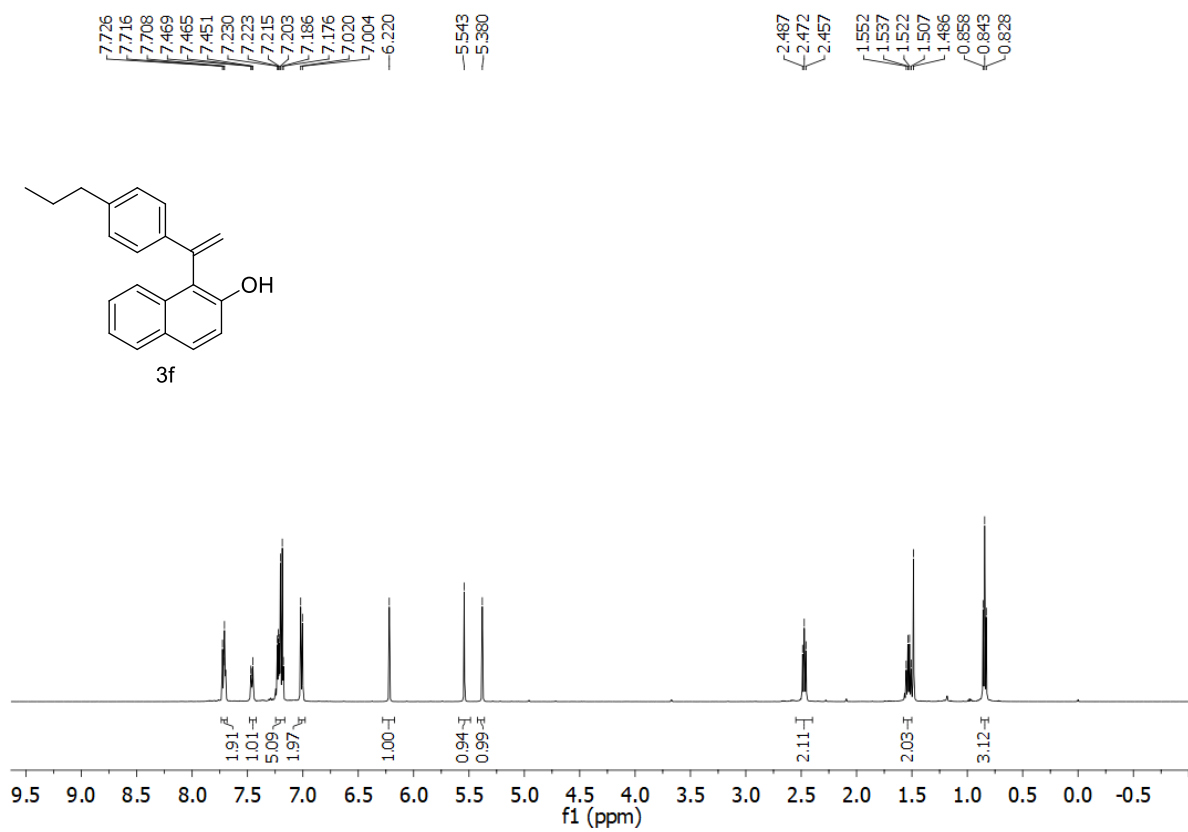

$^1\text{H}$  NMR of 3f in  $\text{CDCl}_3$

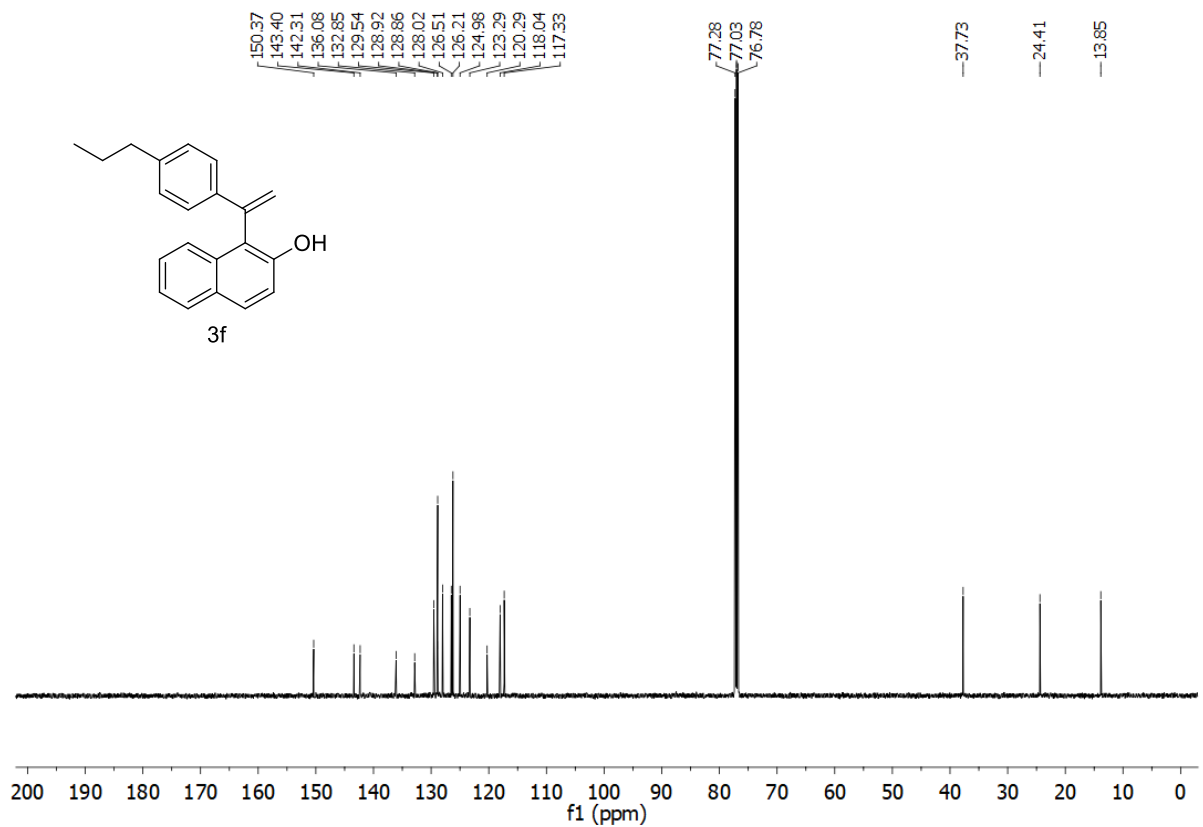

$^{13}\text{C}\{^1\text{H}\}$  NMR of 3f in  $\text{CDCl}_3$

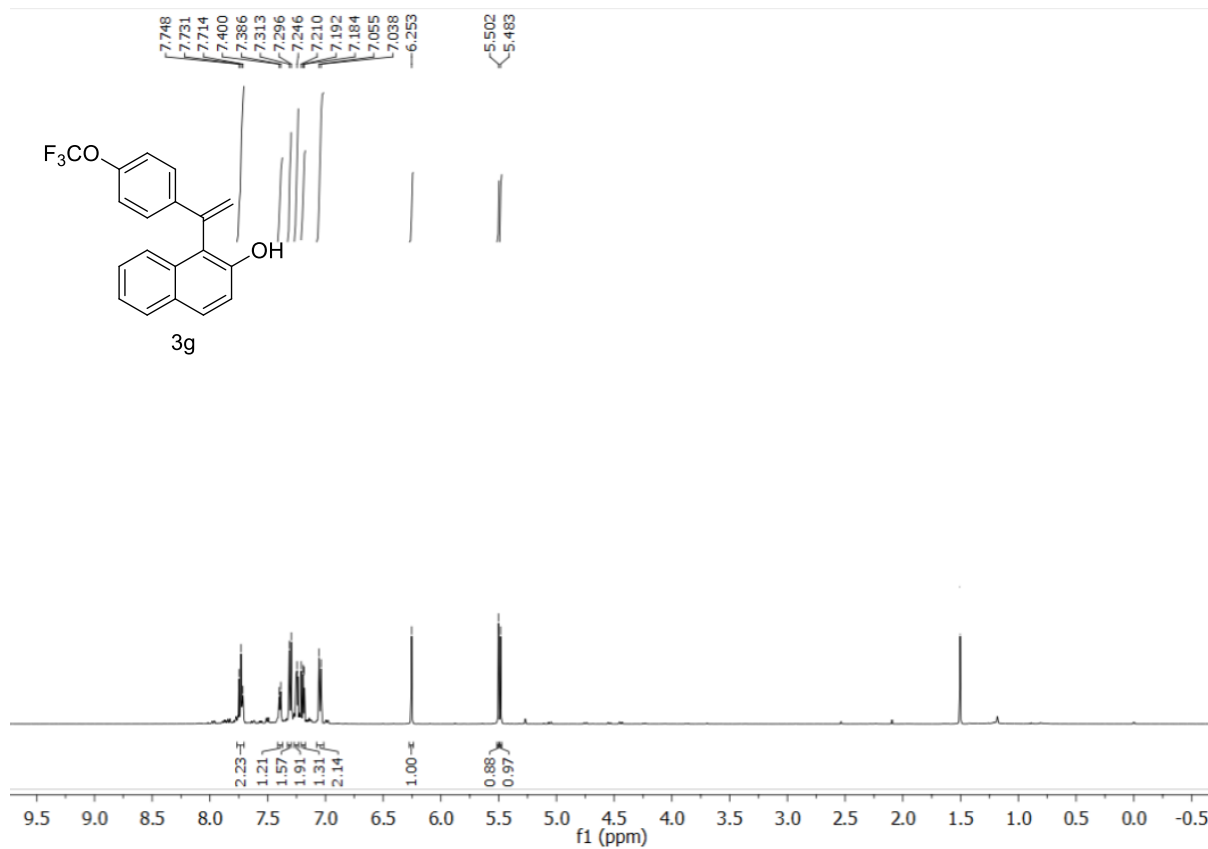

$^1\text{H}$  NMR of 3g in  $\text{CDCl}_3$



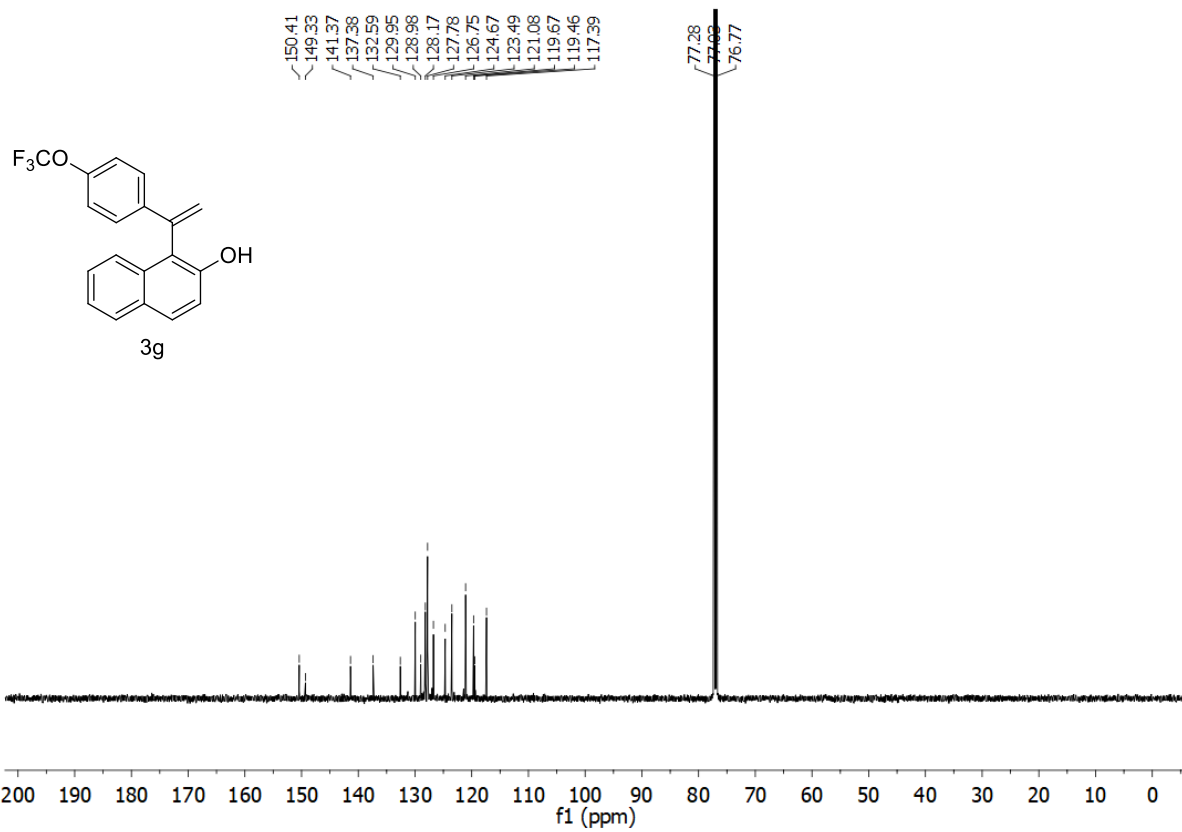

$^{13}\text{C}\{^1\text{H}\}$  NMR of 3g in  $\text{CDCl}_3$

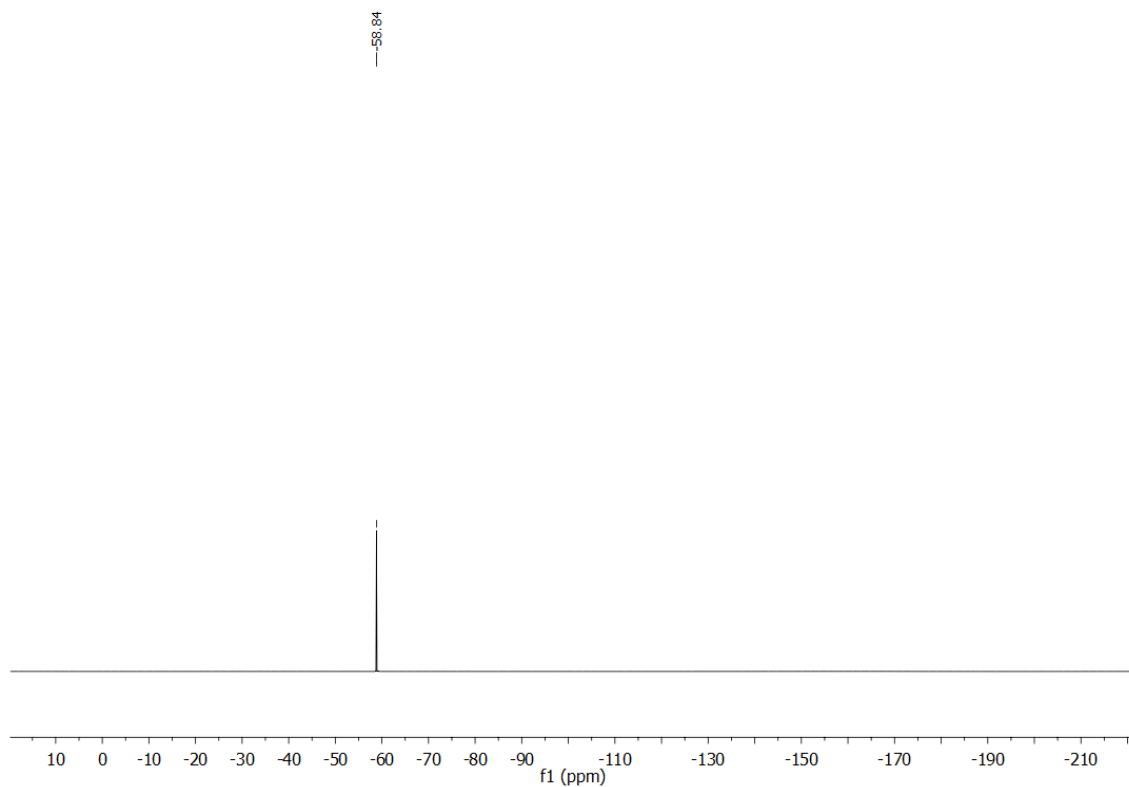

$^{19}\text{F}$  NMR of 3g in  $\text{CDCl}_3$

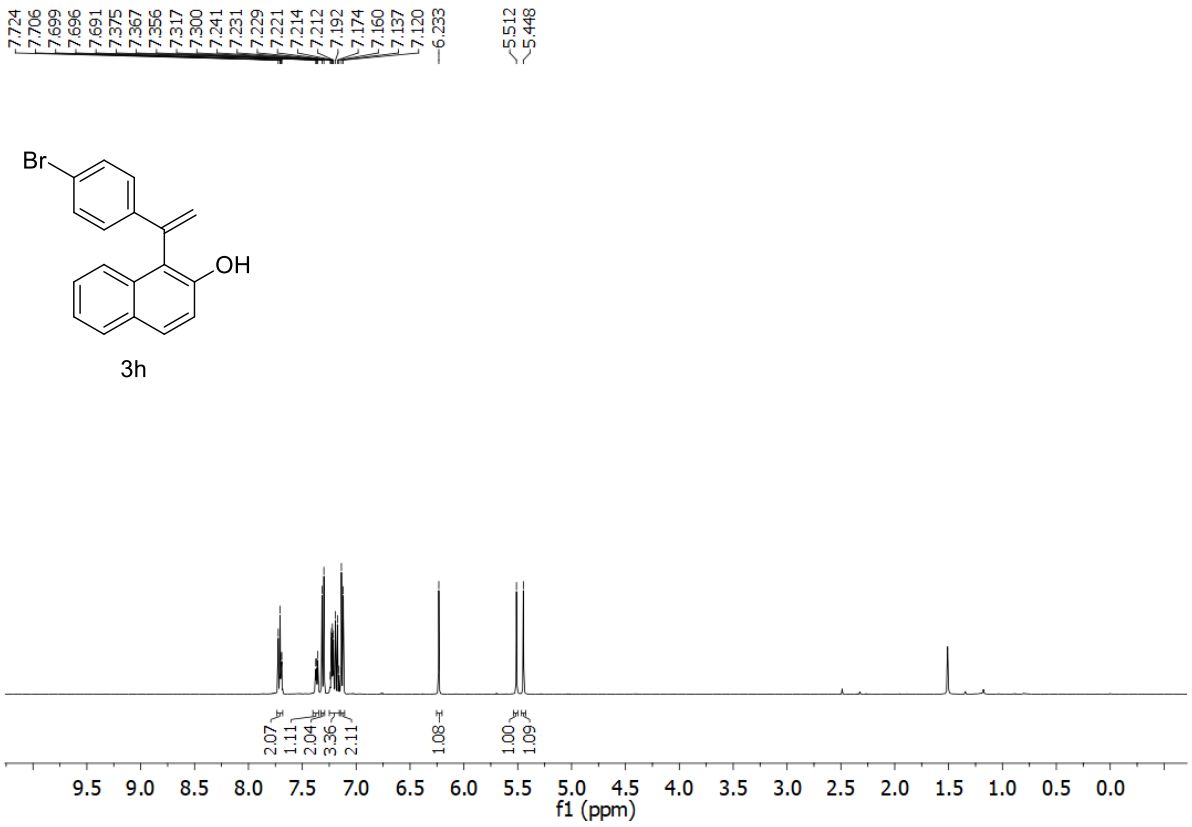

$^1\text{H}$  NMR of 3h in  $\text{CDCl}_3$

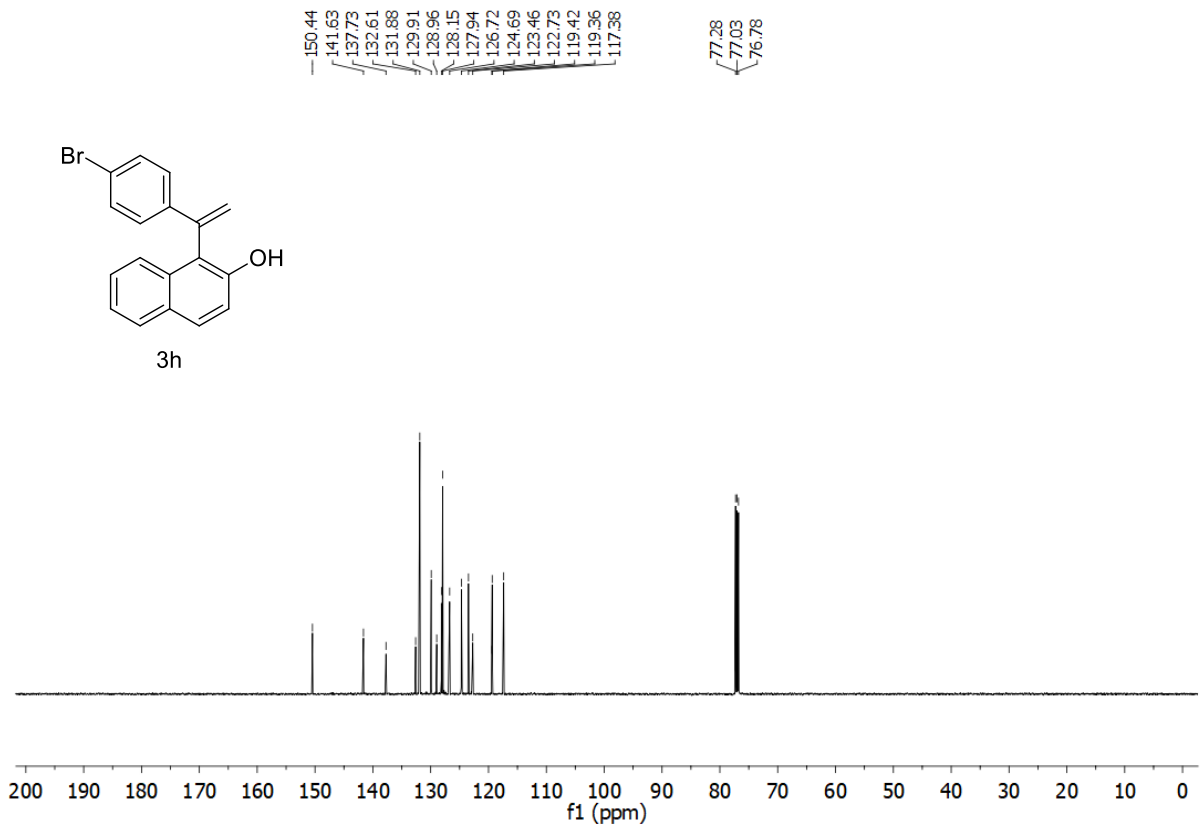

$^{13}\text{C}\{^1\text{H}\}$  NMR of 3h in  $\text{CDCl}_3$

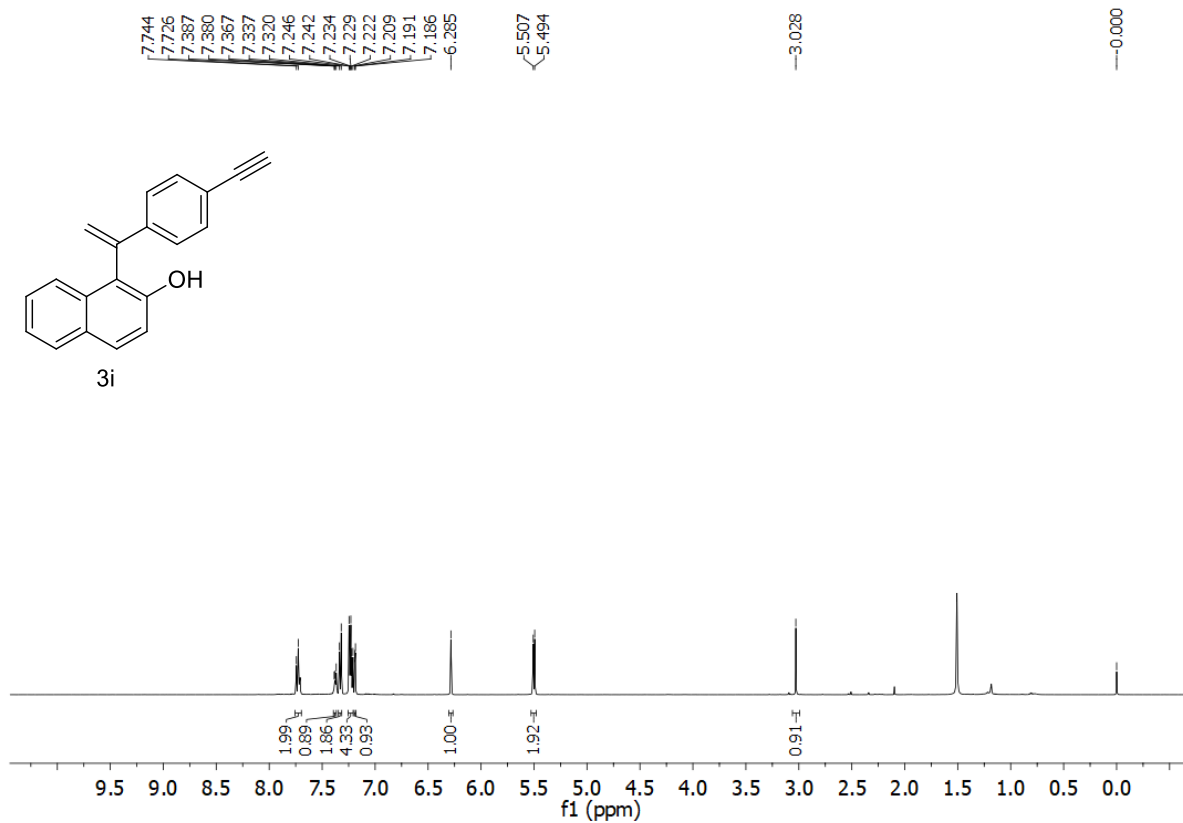

$^1\text{H}$  NMR of 3i in  $\text{CDCl}_3$

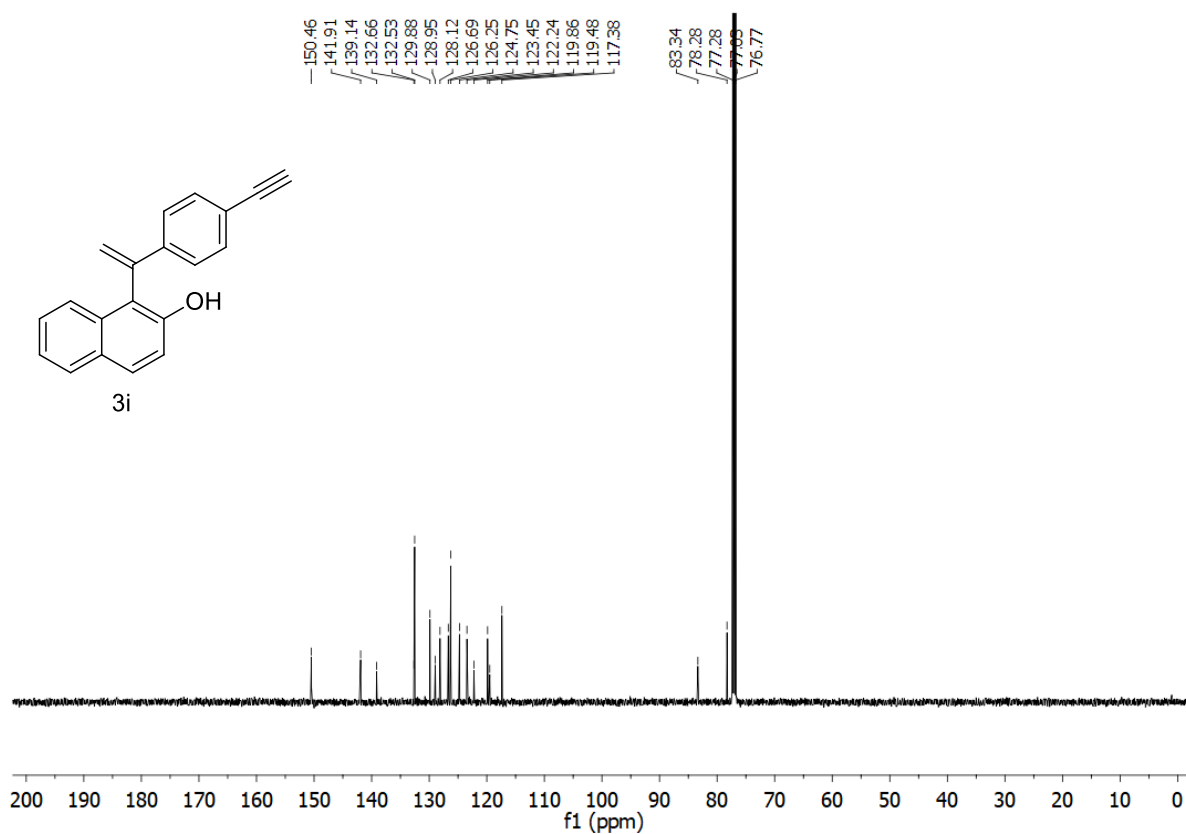

$^{13}\text{C}\{^1\text{H}\}$  NMR of 3i in  $\text{CDCl}_3$

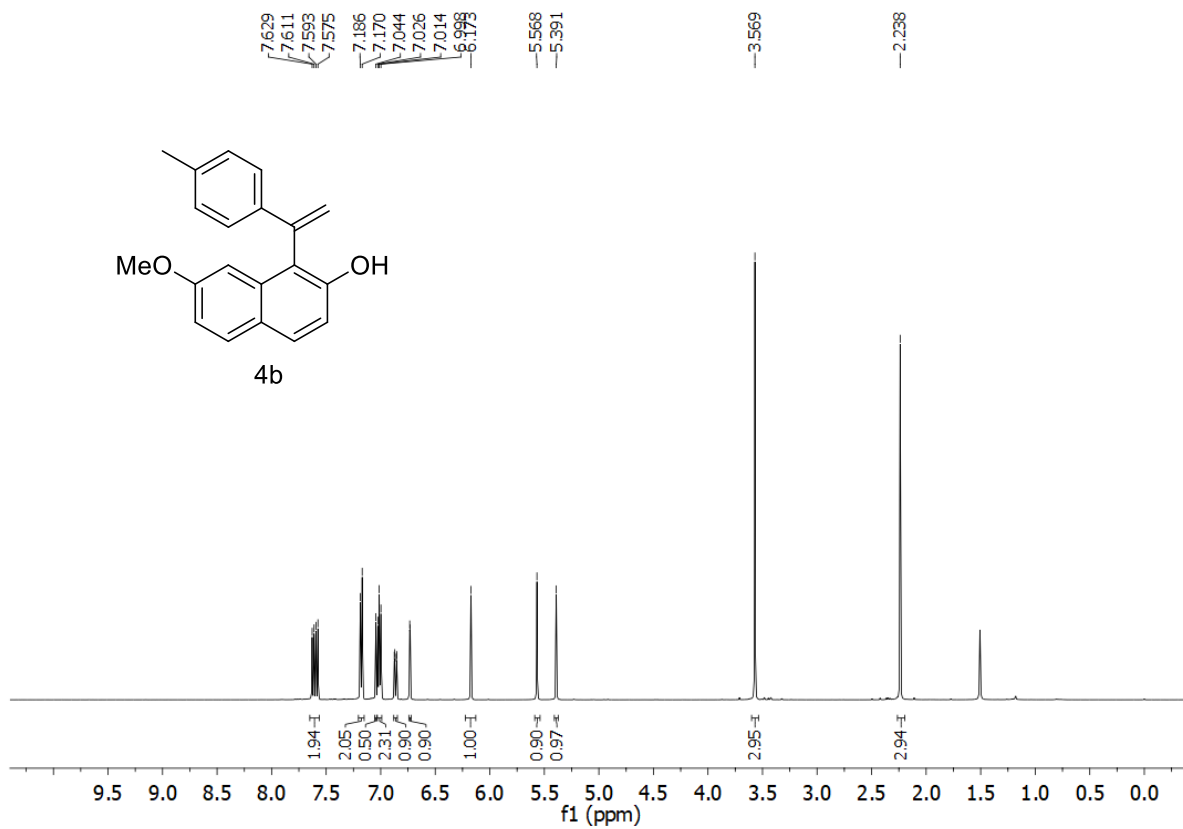

<sup>1</sup>H NMR of 4b in CDCl<sub>3</sub>

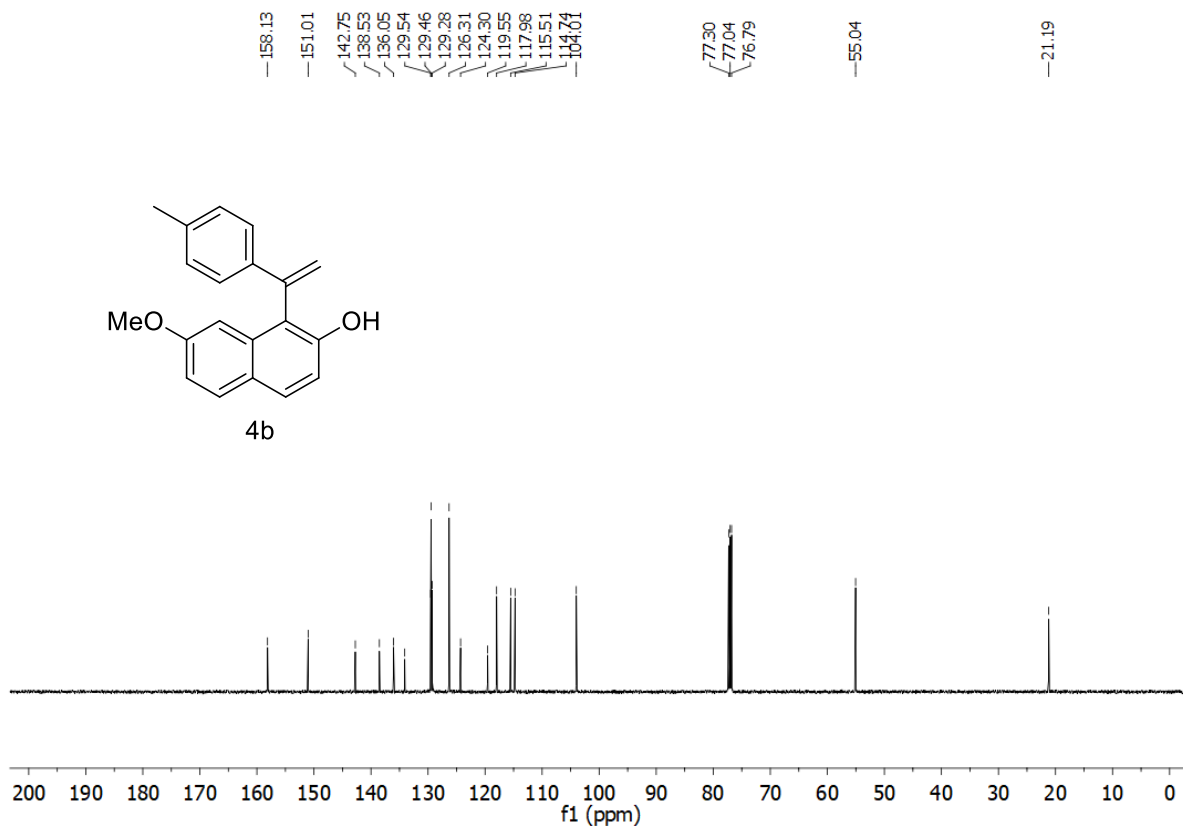

<sup>13</sup>C{<sup>1</sup>H} NMR of 4b in CDCl<sub>3</sub>

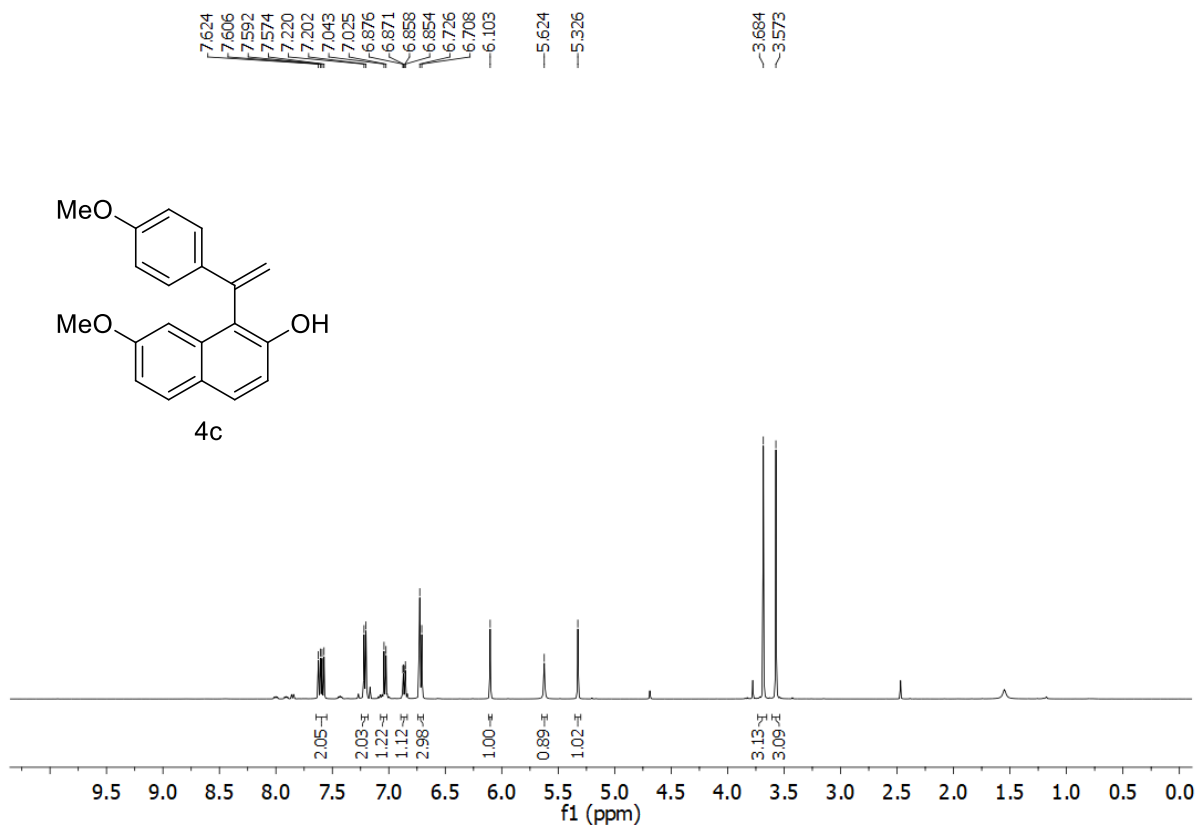

$^1\text{H}$  NMR of 4c in  $\text{CDCl}_3$

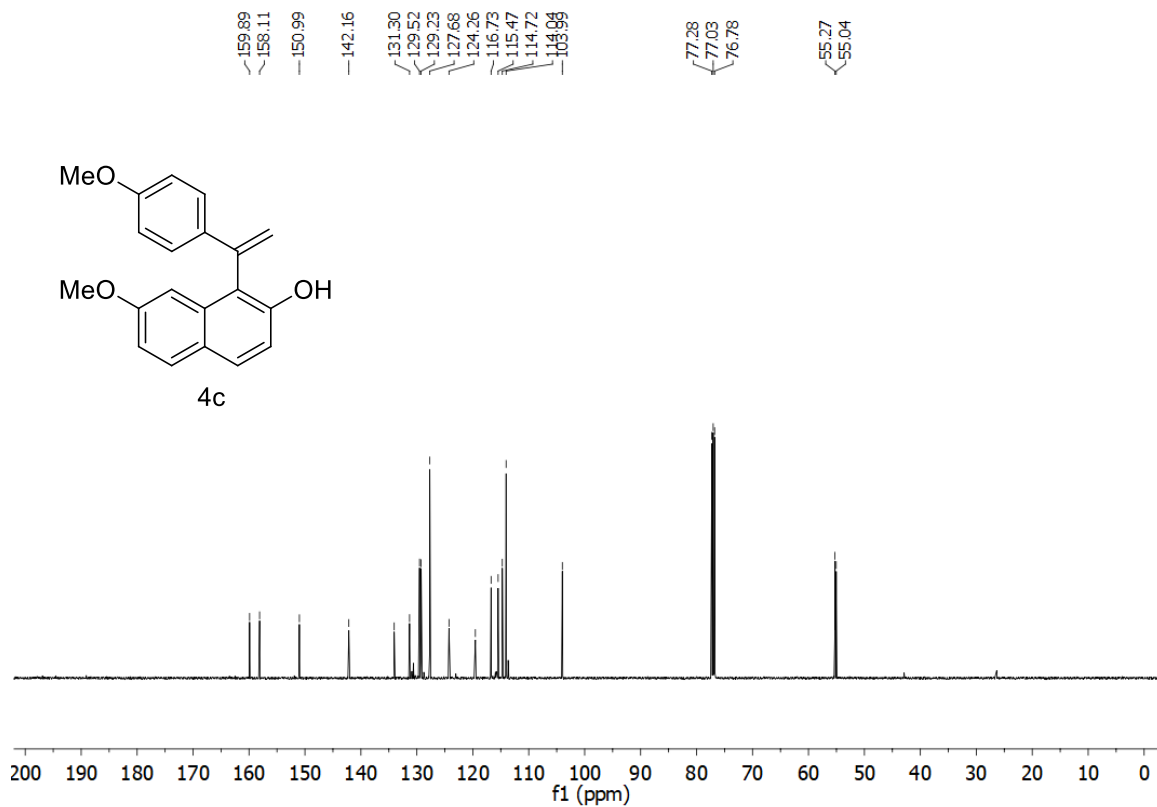

$^{13}\text{C}\{^1\text{H}\}$  NMR of 4c in  $\text{CDCl}_3$

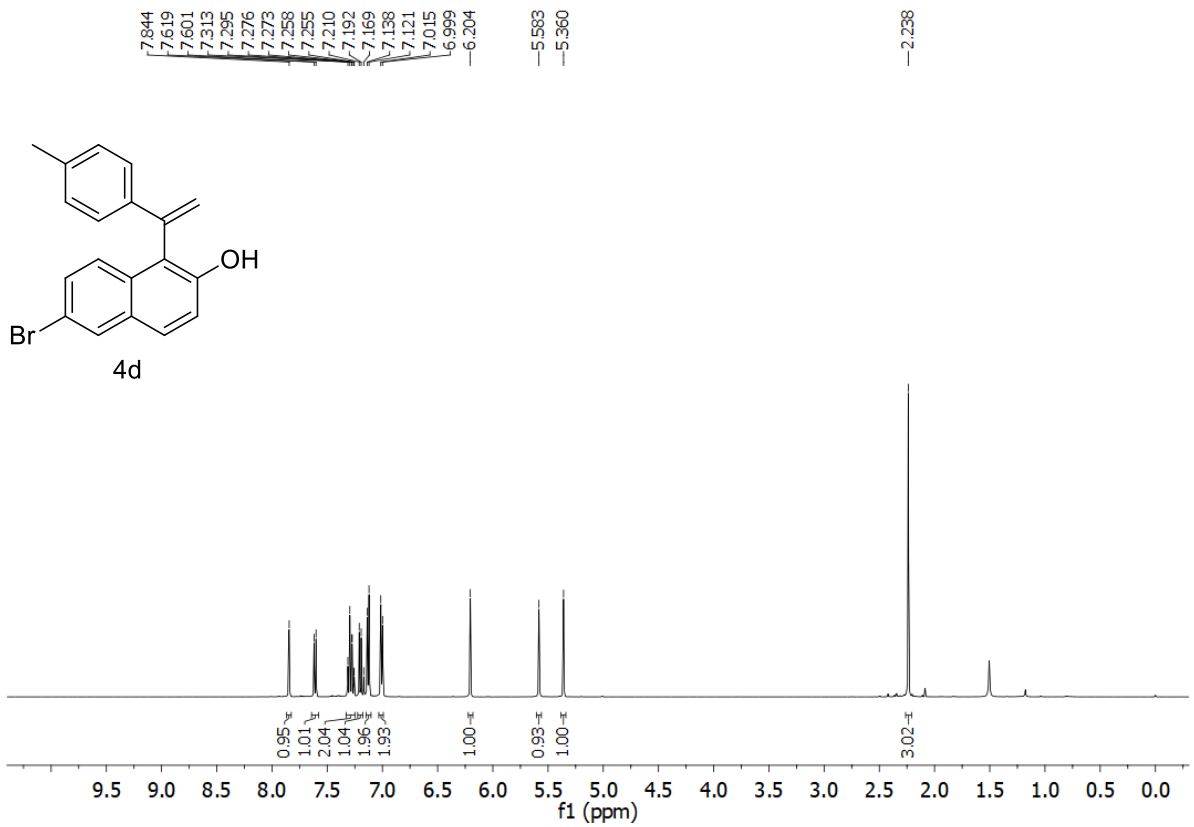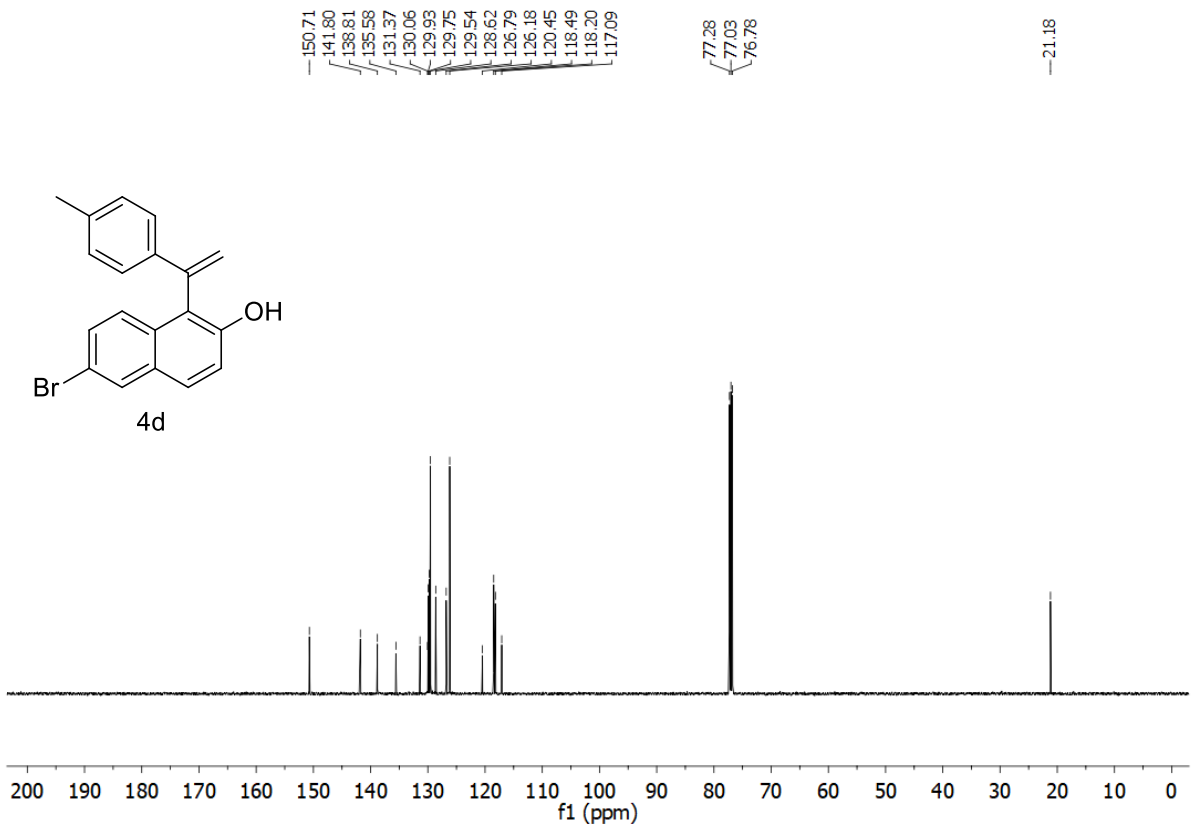

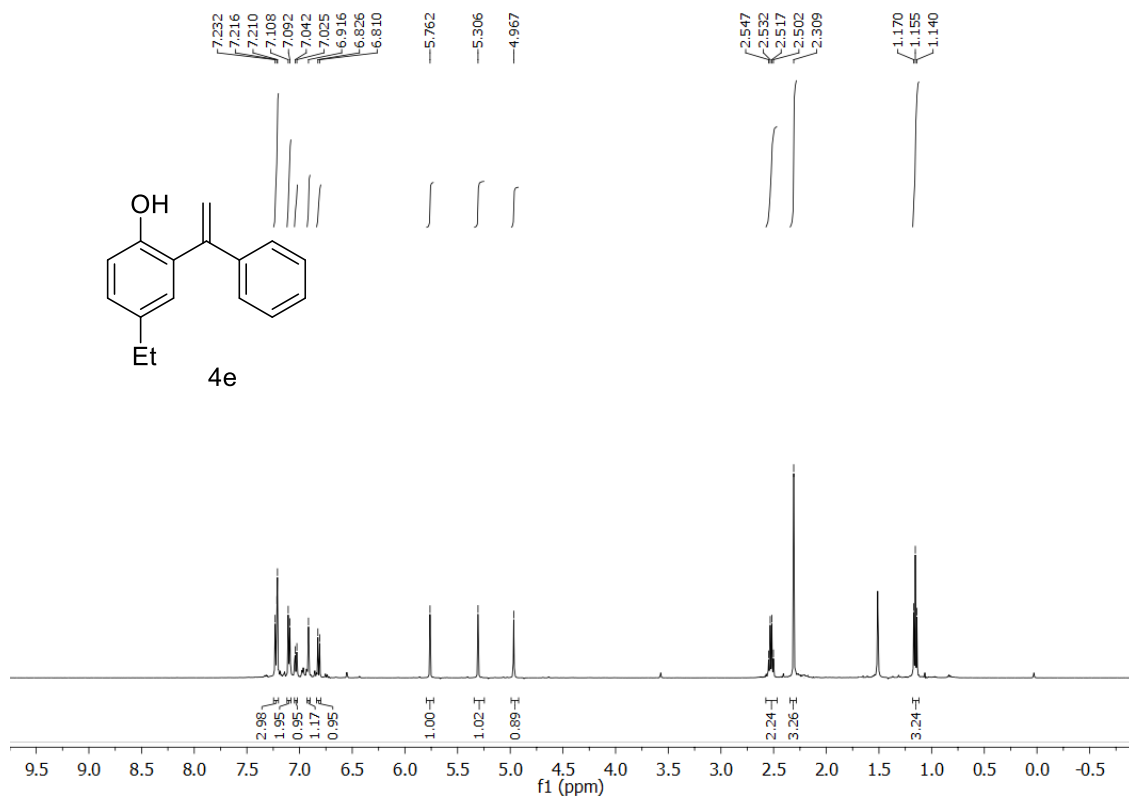

$^1\text{H}$  NMR of 4e in  $\text{CDCl}_3$

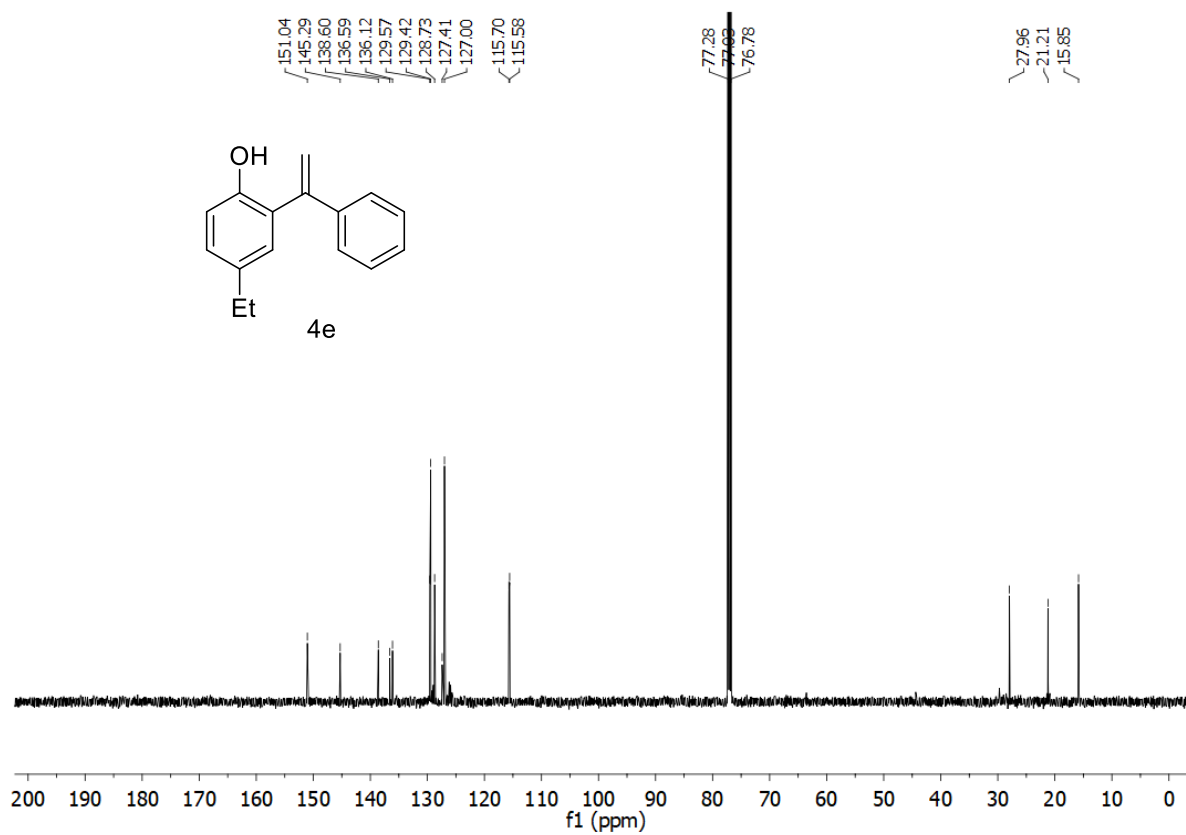

$^{13}\text{C}\{^1\text{H}\}$  NMR of 4e in  $\text{CDCl}_3$

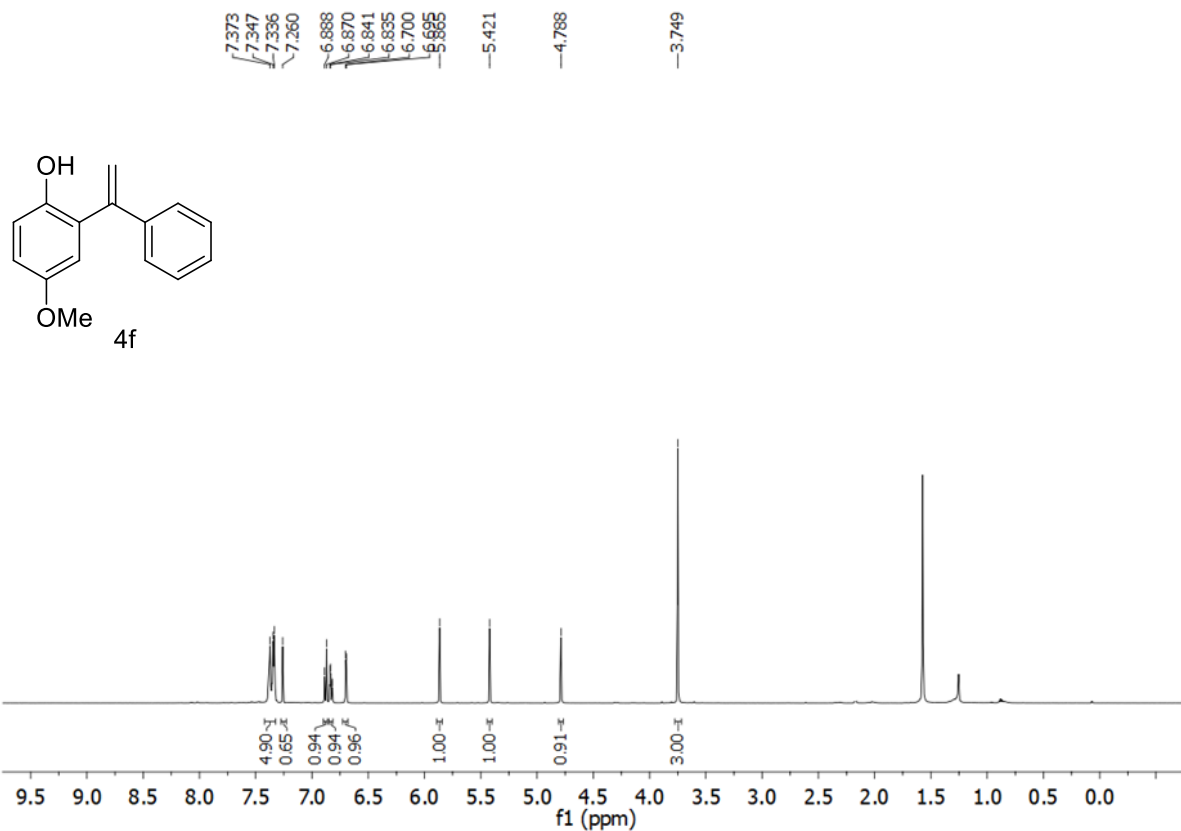

$^1\text{H NMR}$  of 4f in  $\text{CDCl}_3$

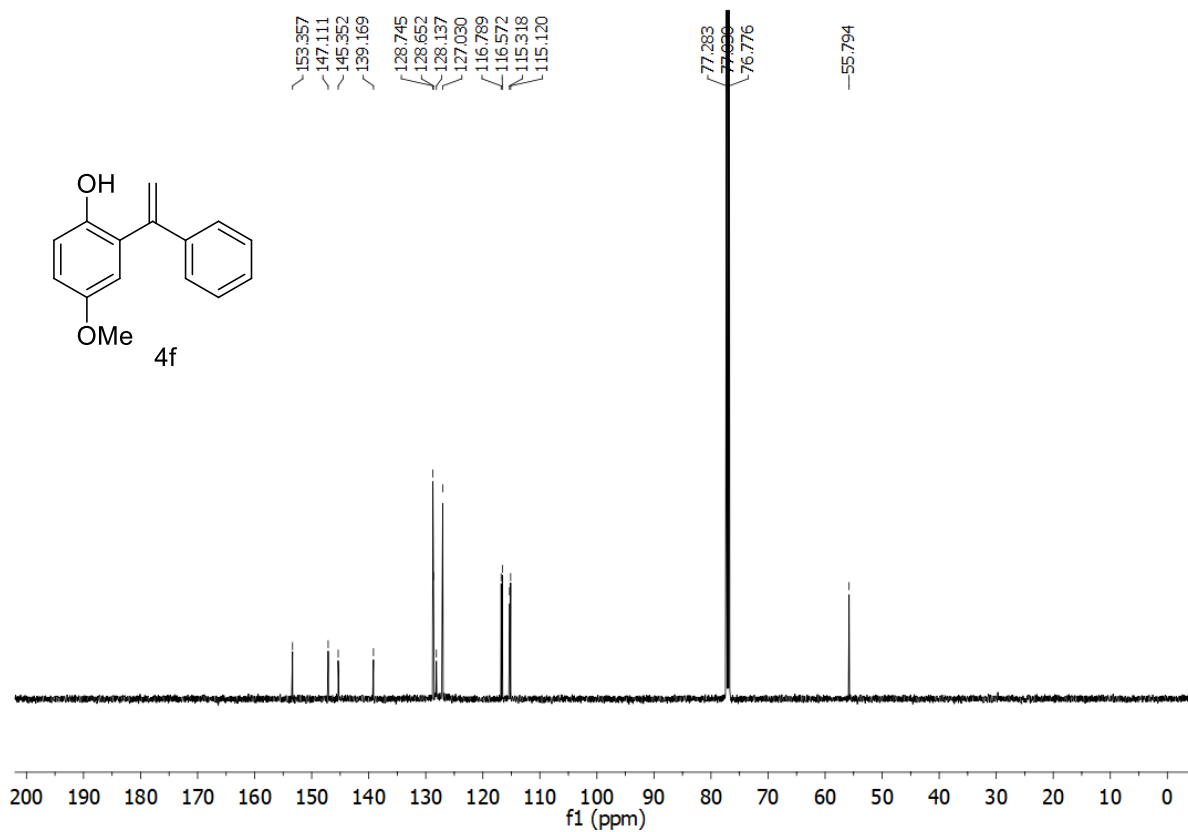

$^{13}\text{C}\{^1\text{H}\}$  NMR of 4f in  $\text{CDCl}_3$



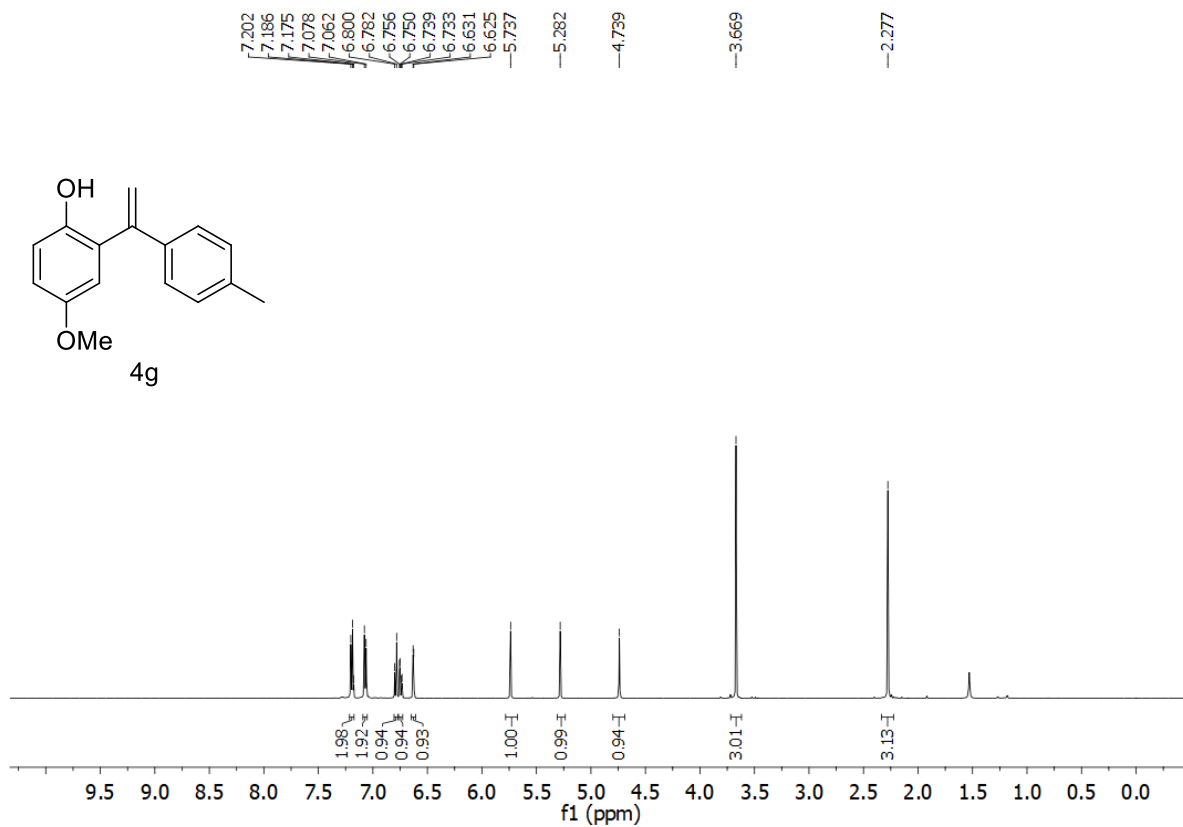

$^1\text{H}$  NMR of 4g in  $\text{CDCl}_3$

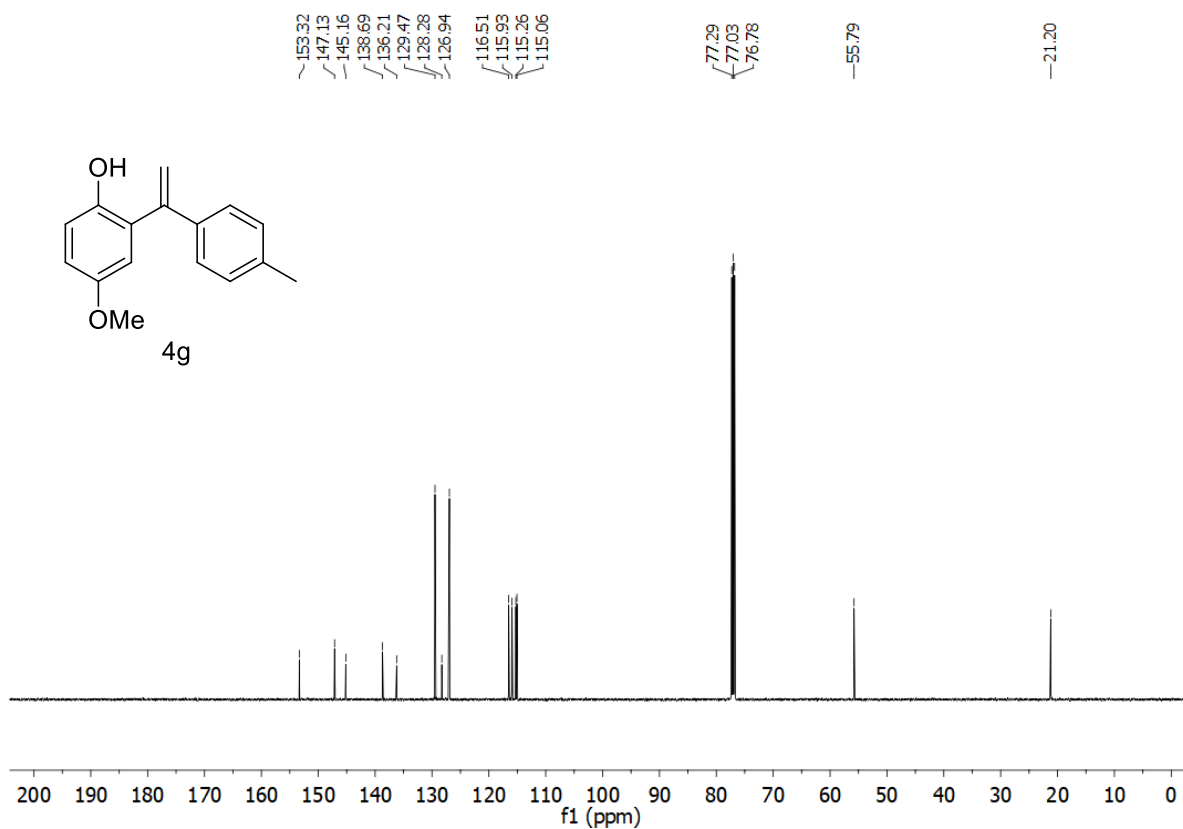

$^{13}\text{C}\{^1\text{H}\}$  NMR of 4g in  $\text{CDCl}_3$

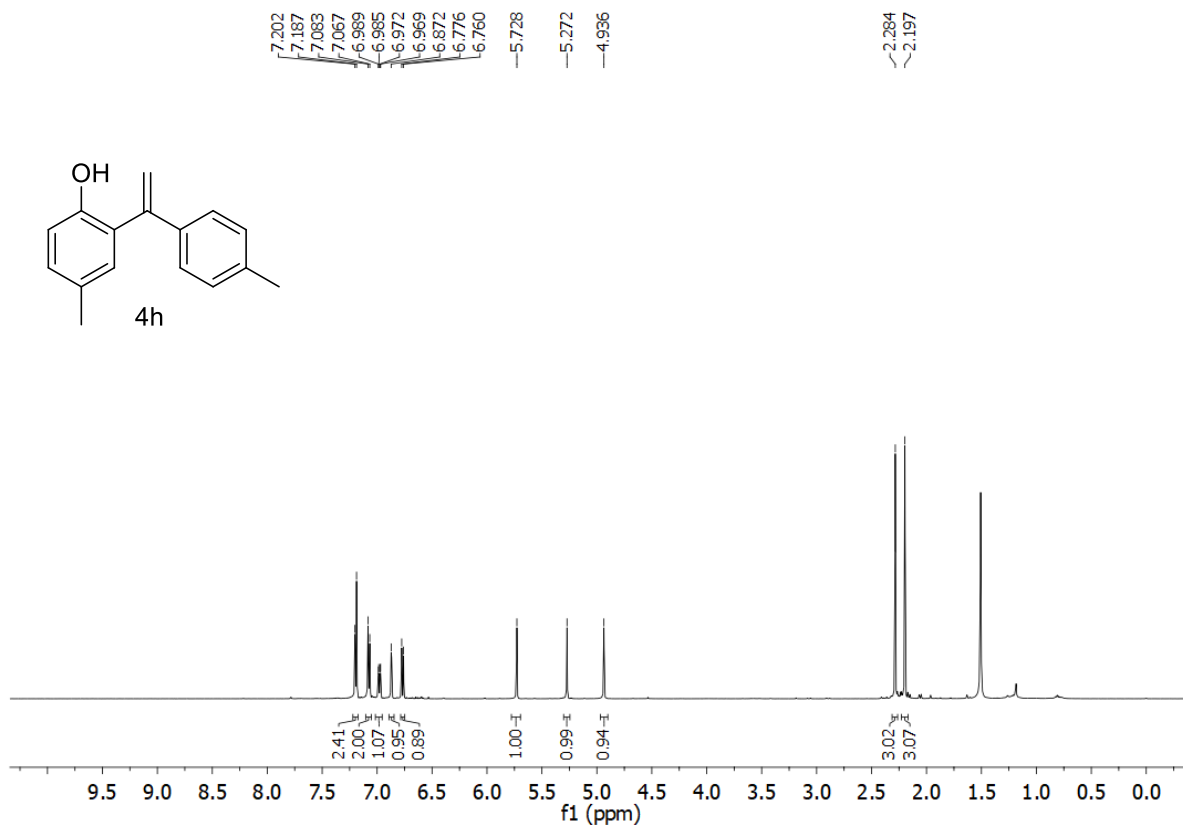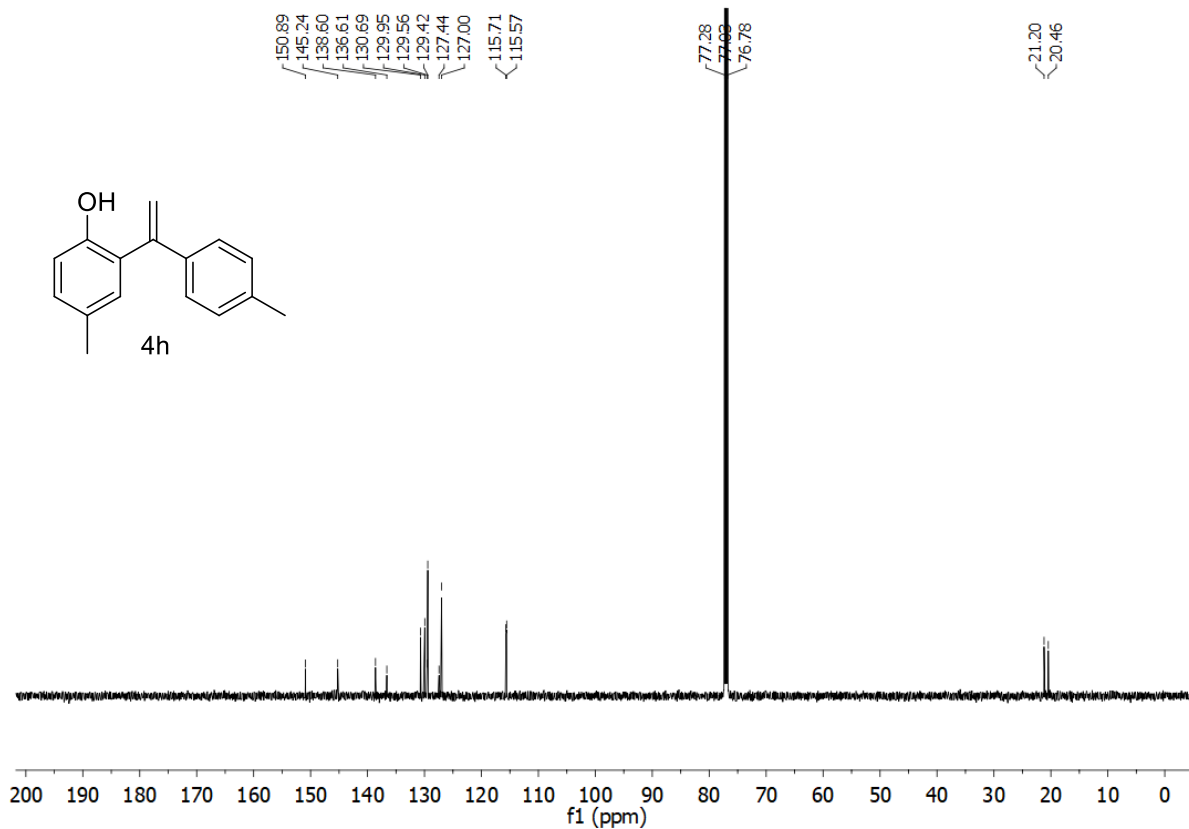

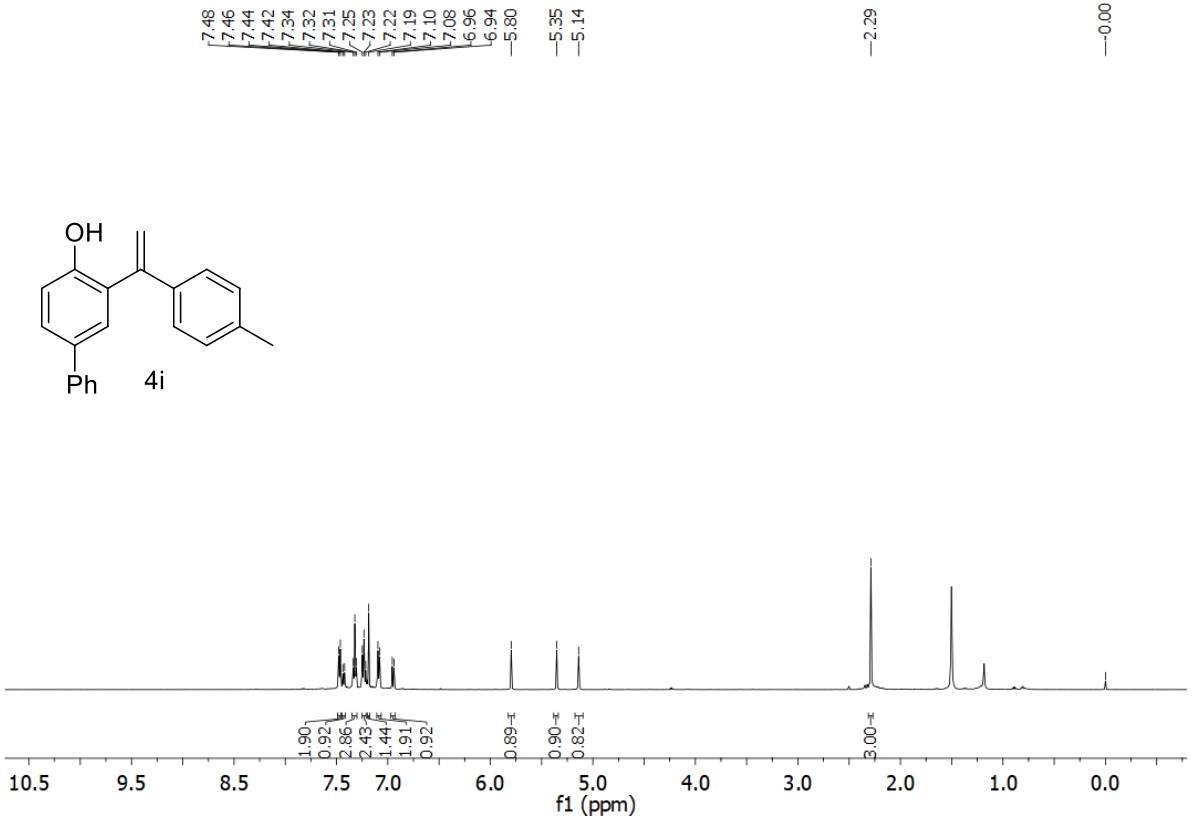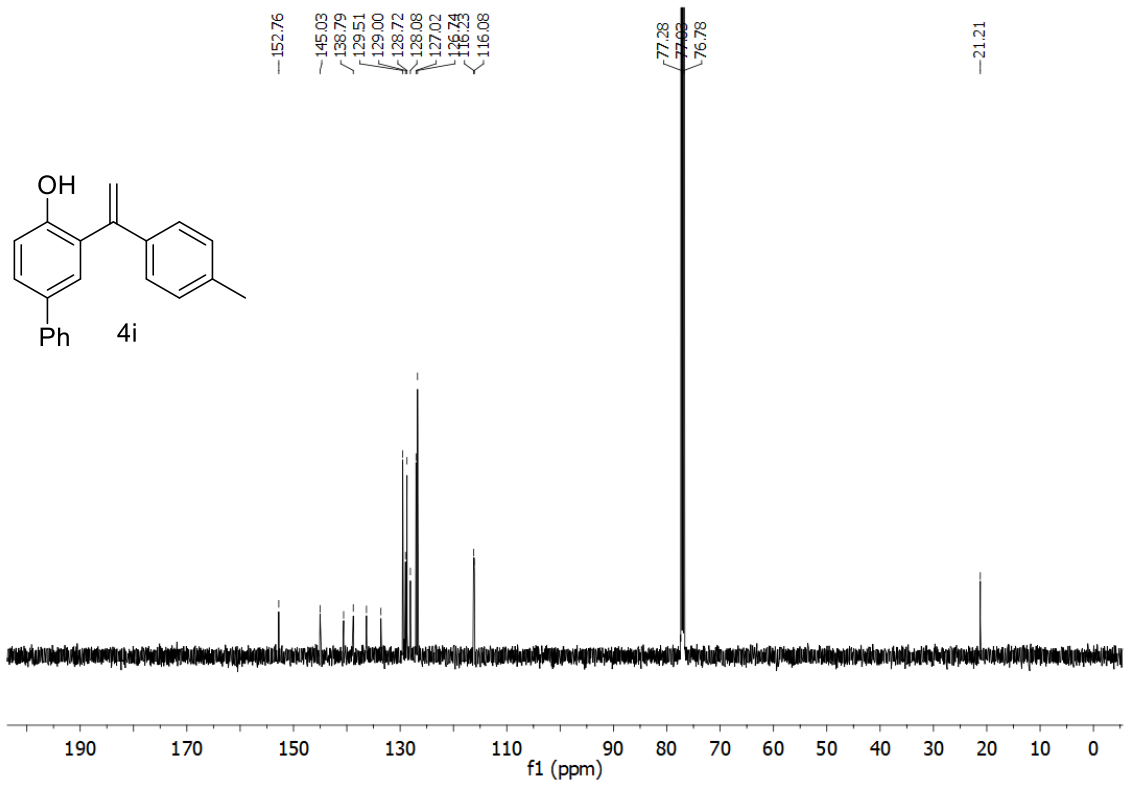

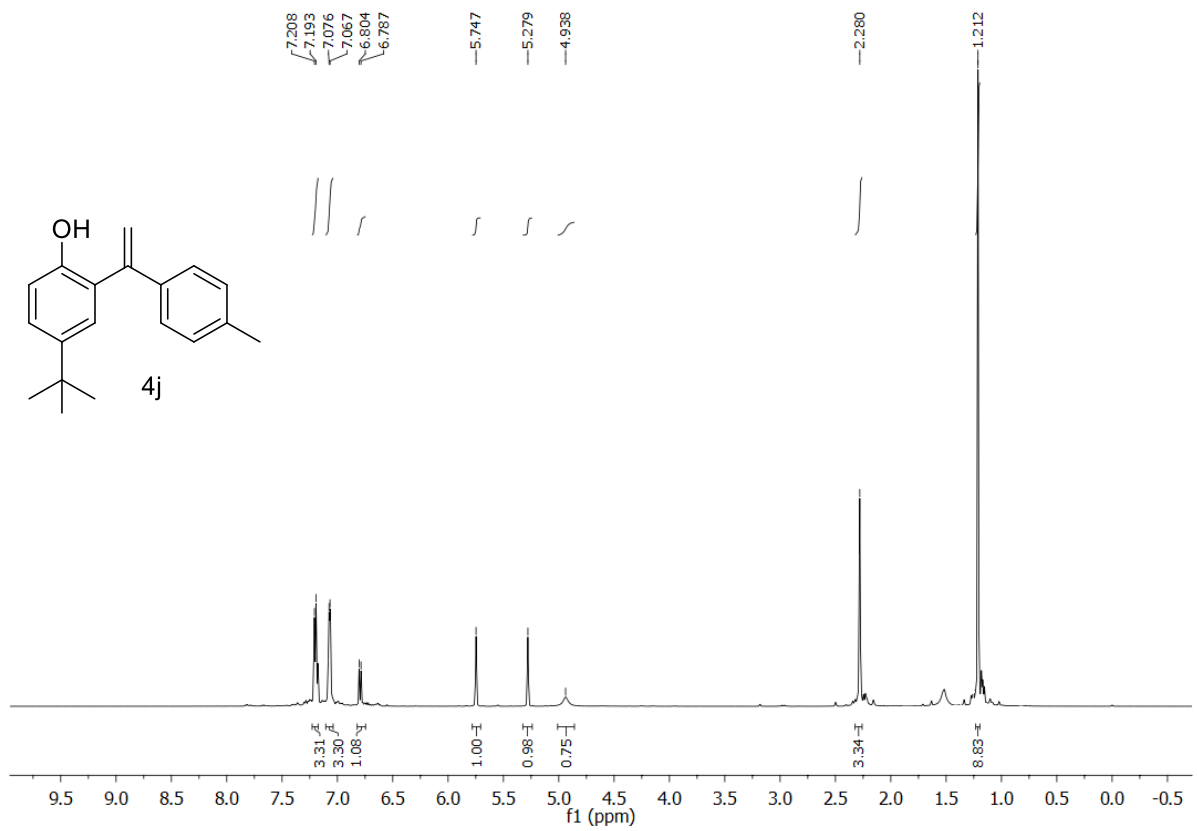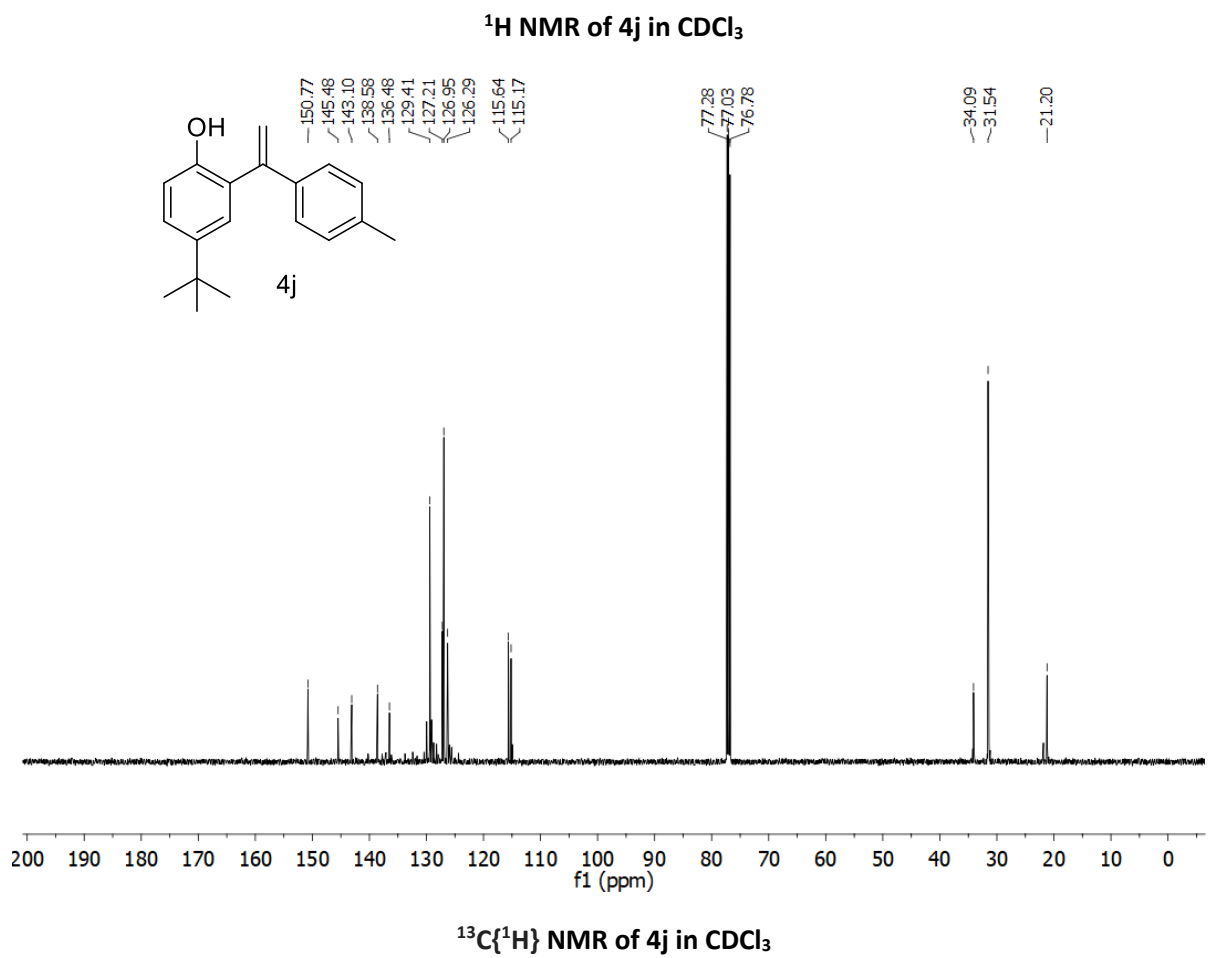

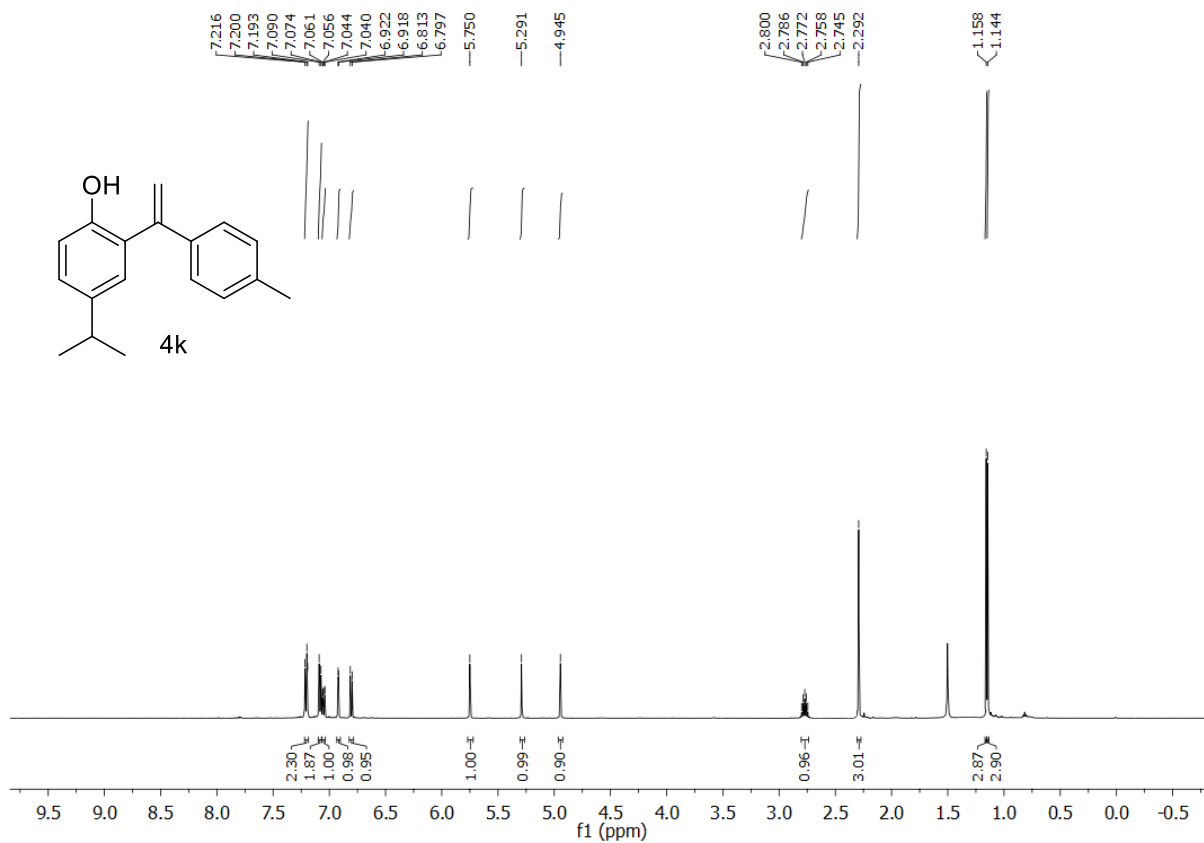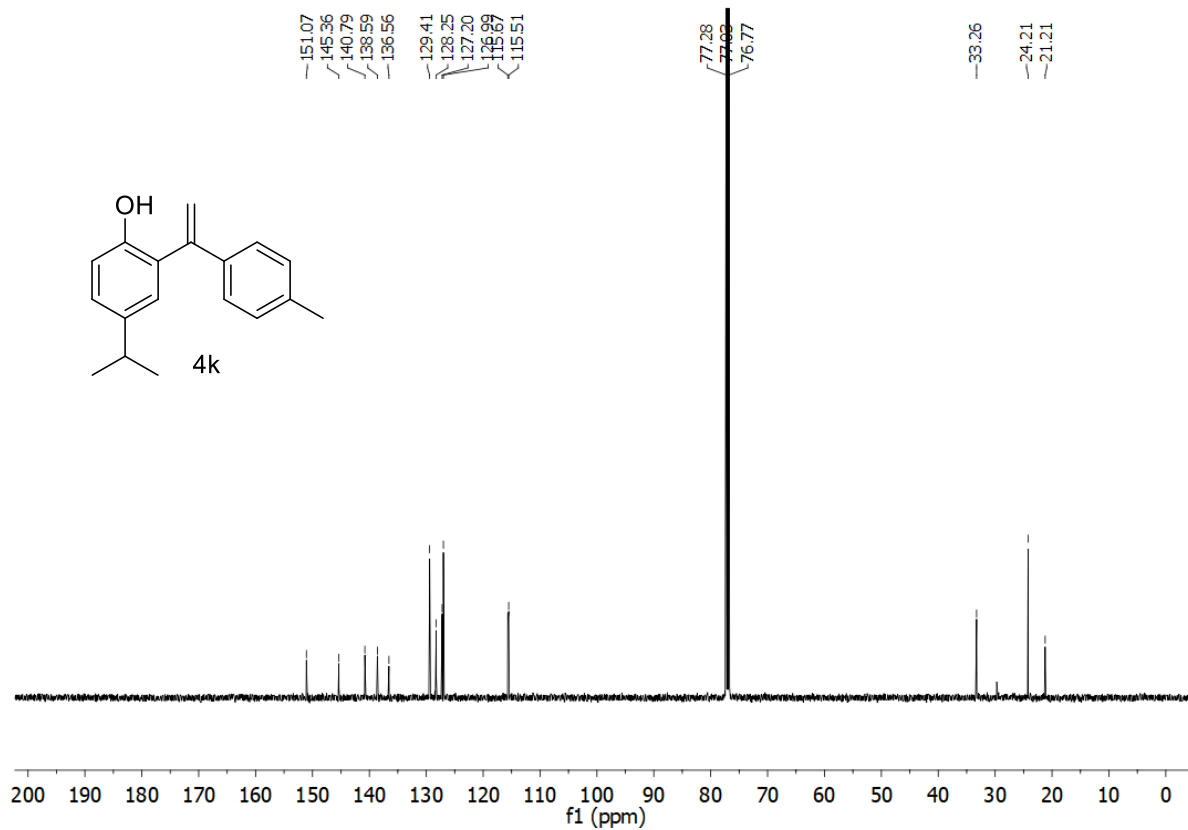

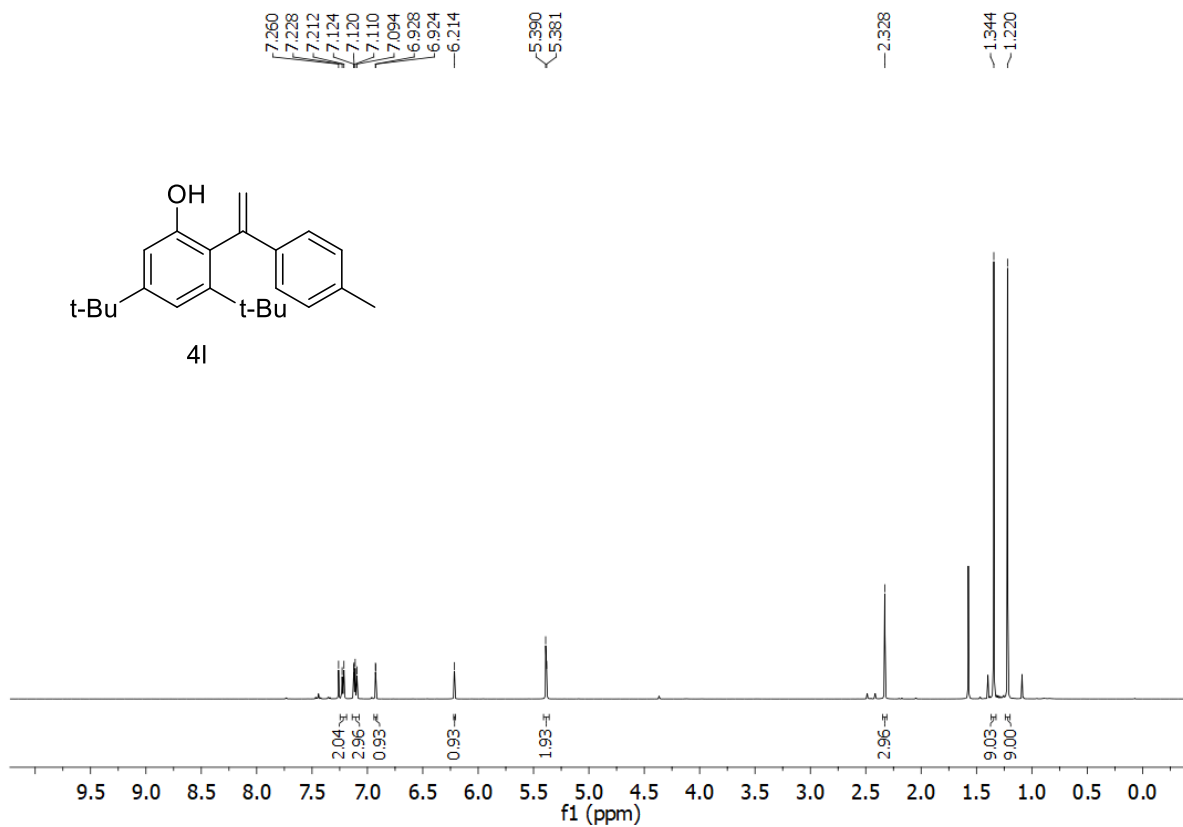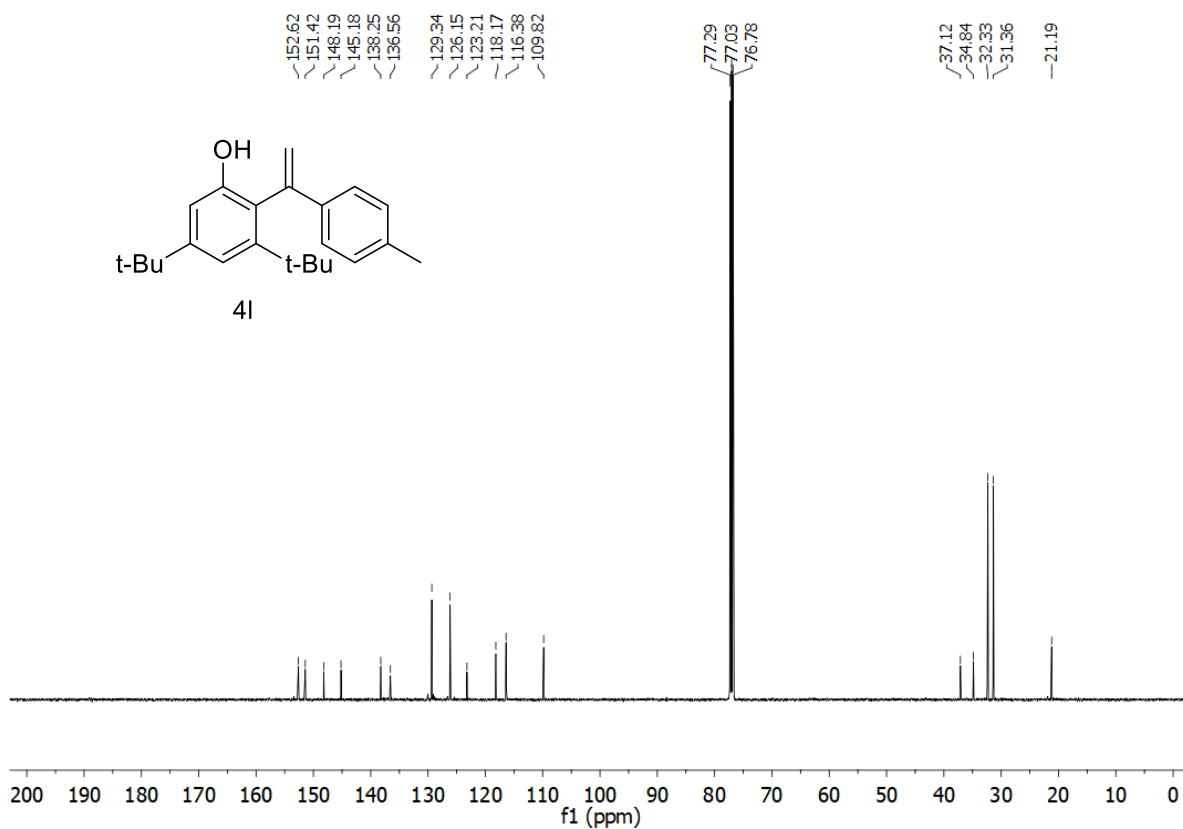

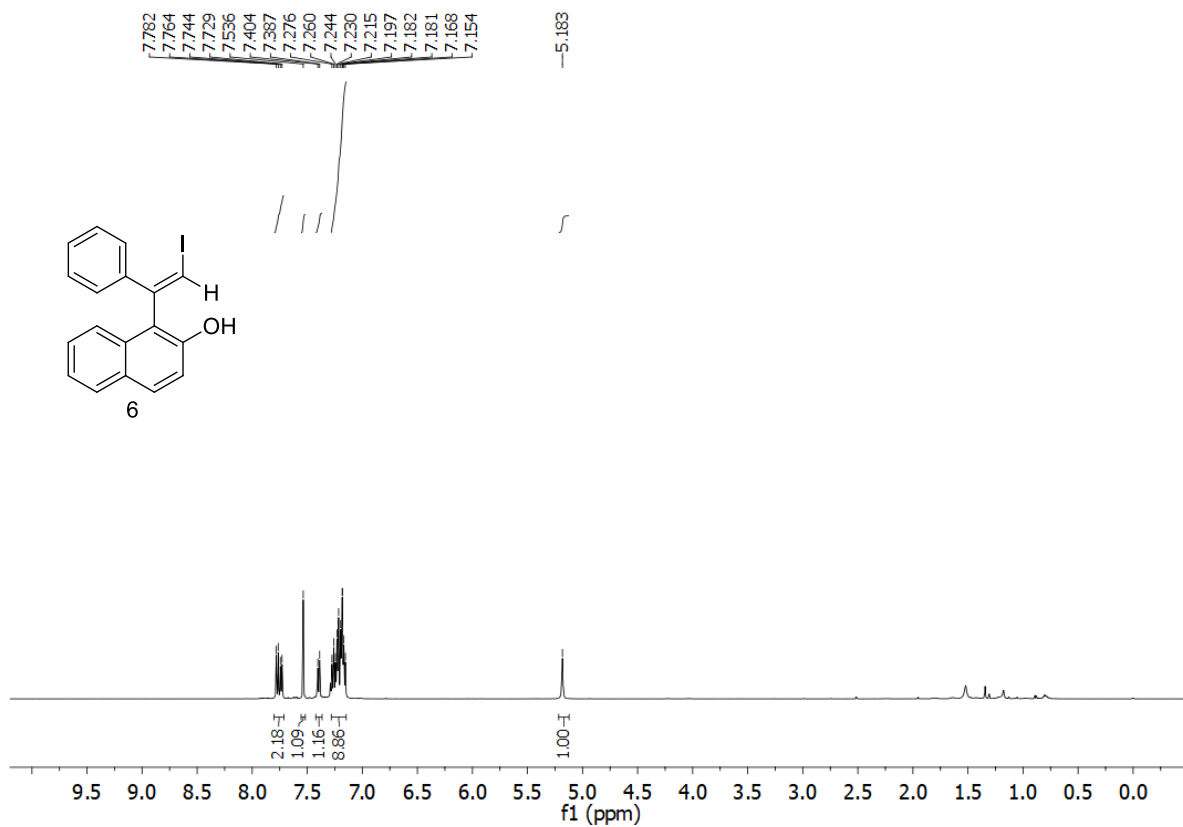

<sup>1</sup>H NMR of 6 in CDCl<sub>3</sub>

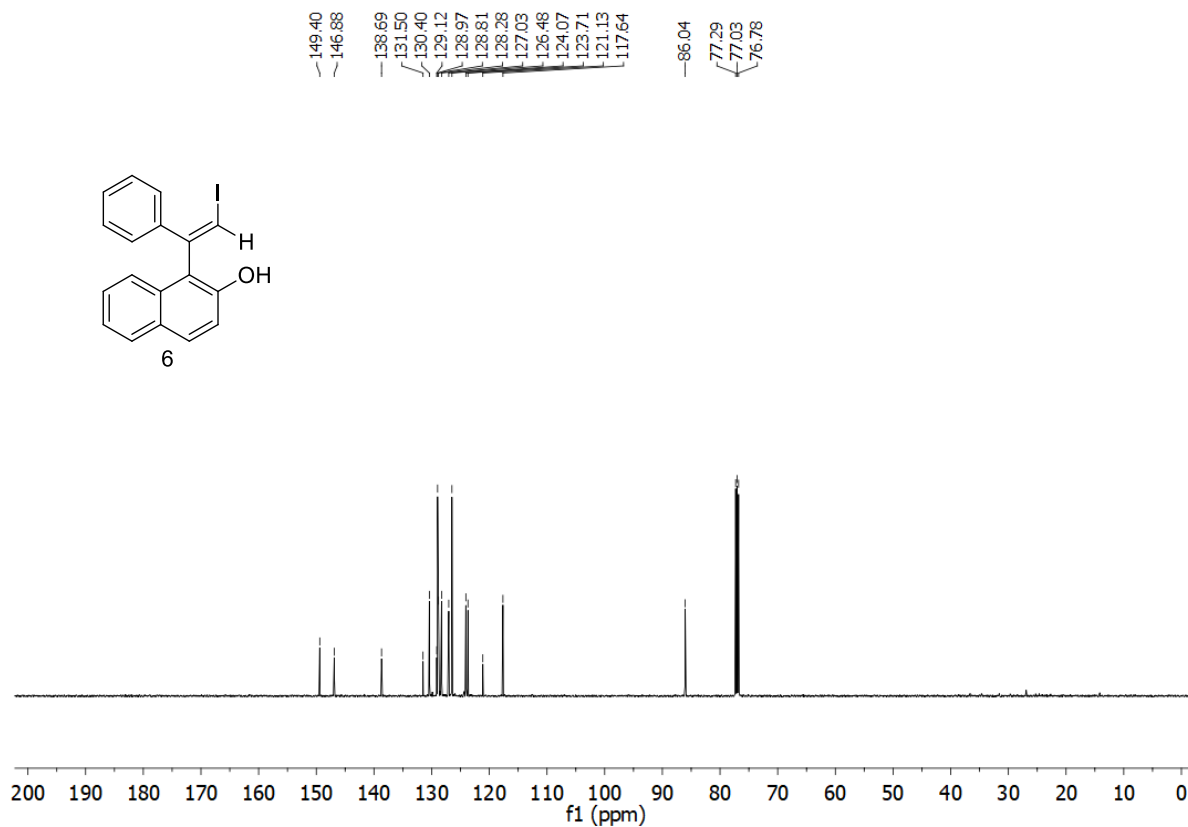

<sup>13</sup>C{<sup>1</sup>H} NMR of 6 in CDCl<sub>3</sub>

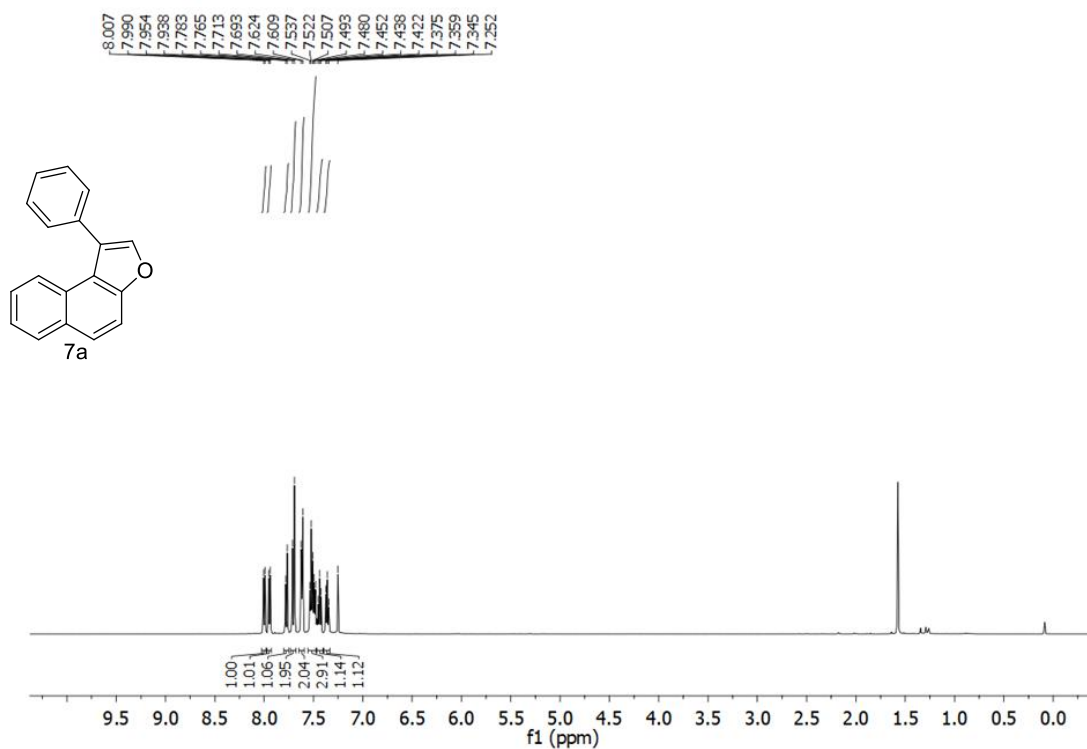

<sup>1</sup>H NMR of 7a in CDCl<sub>3</sub>

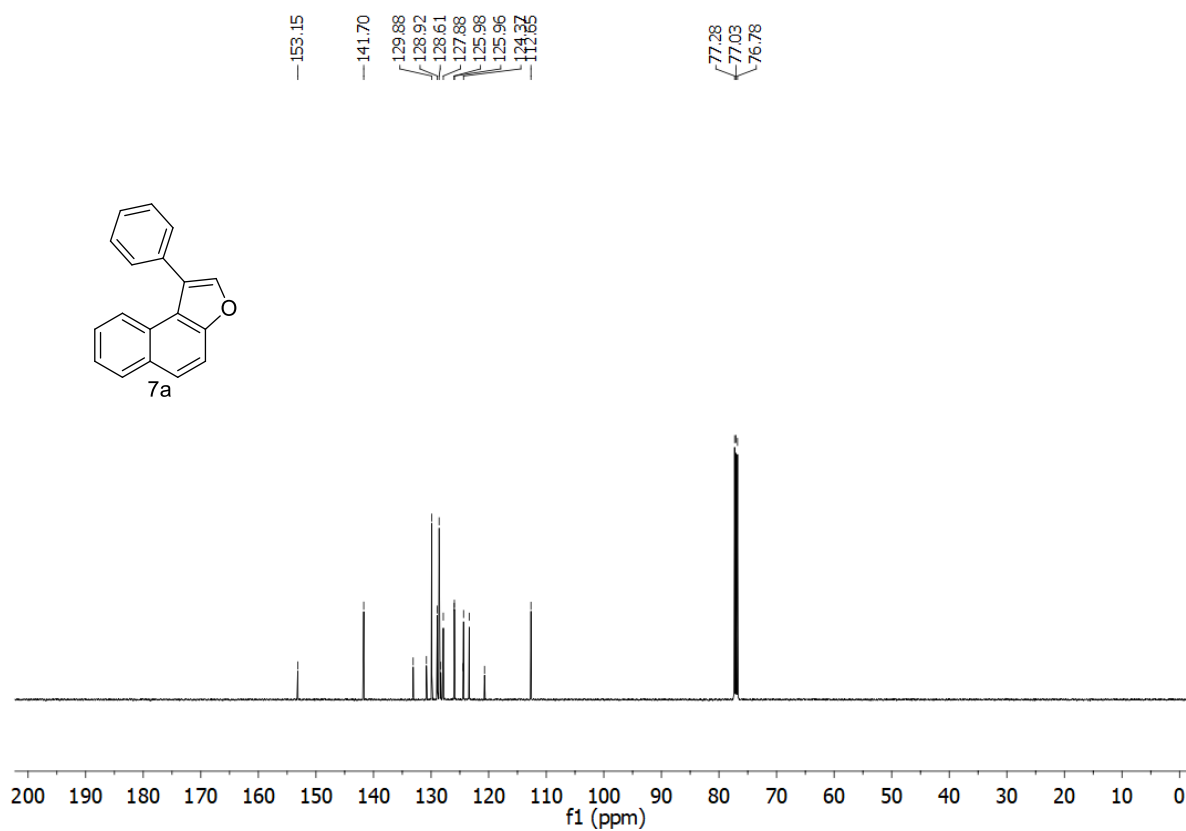

<sup>13</sup>C{<sup>1</sup>H} NMR of 7a in CDCl<sub>3</sub>



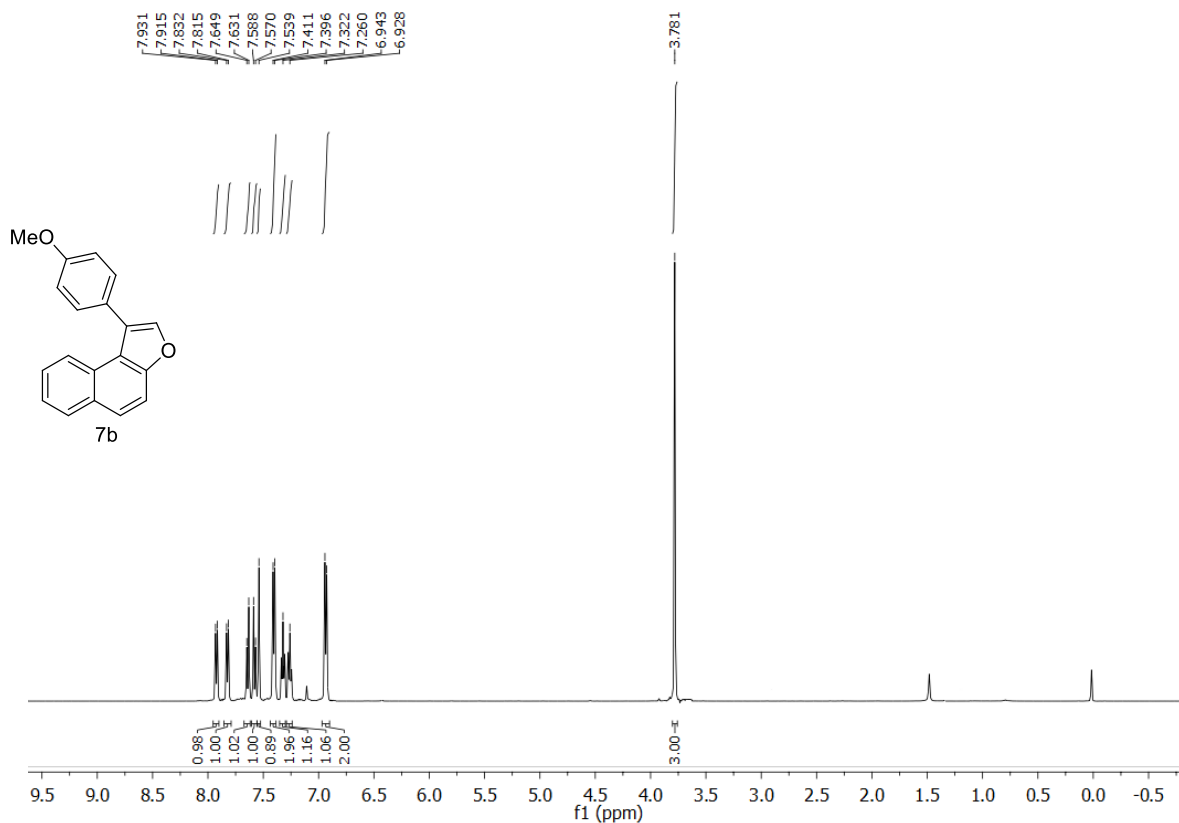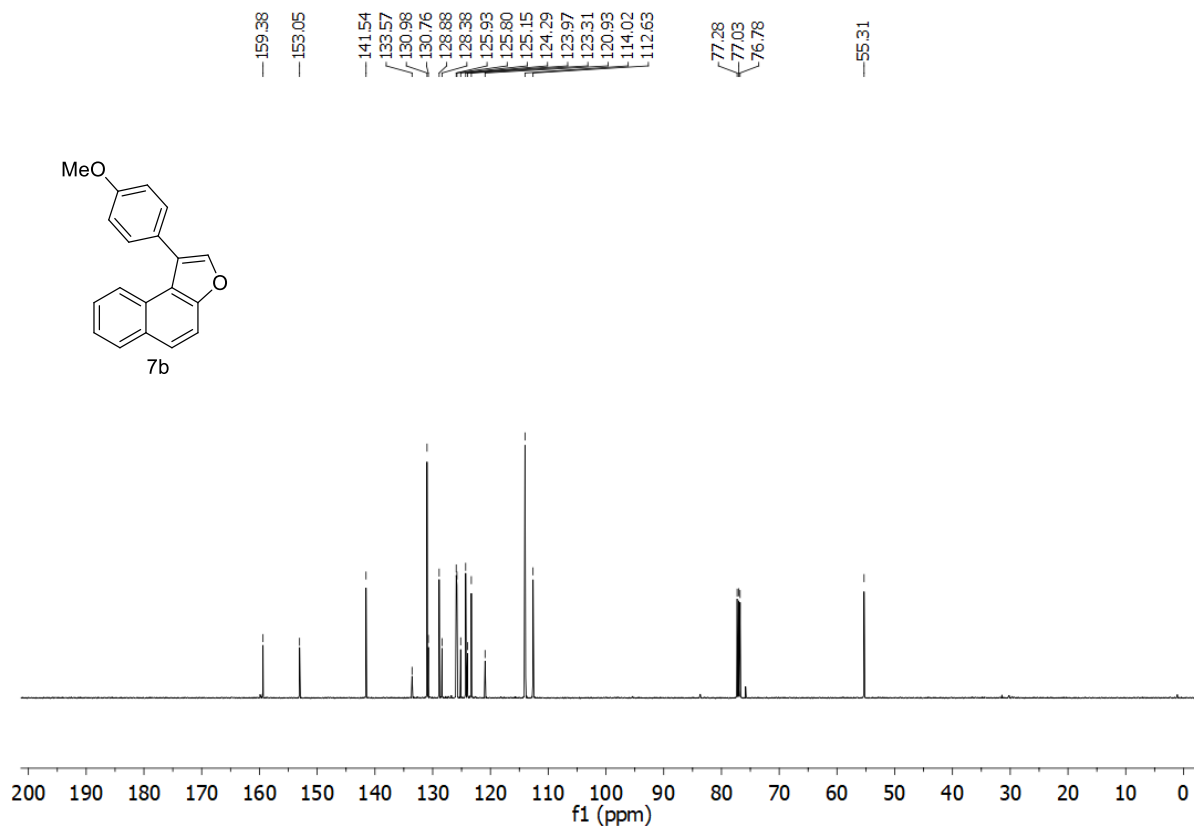

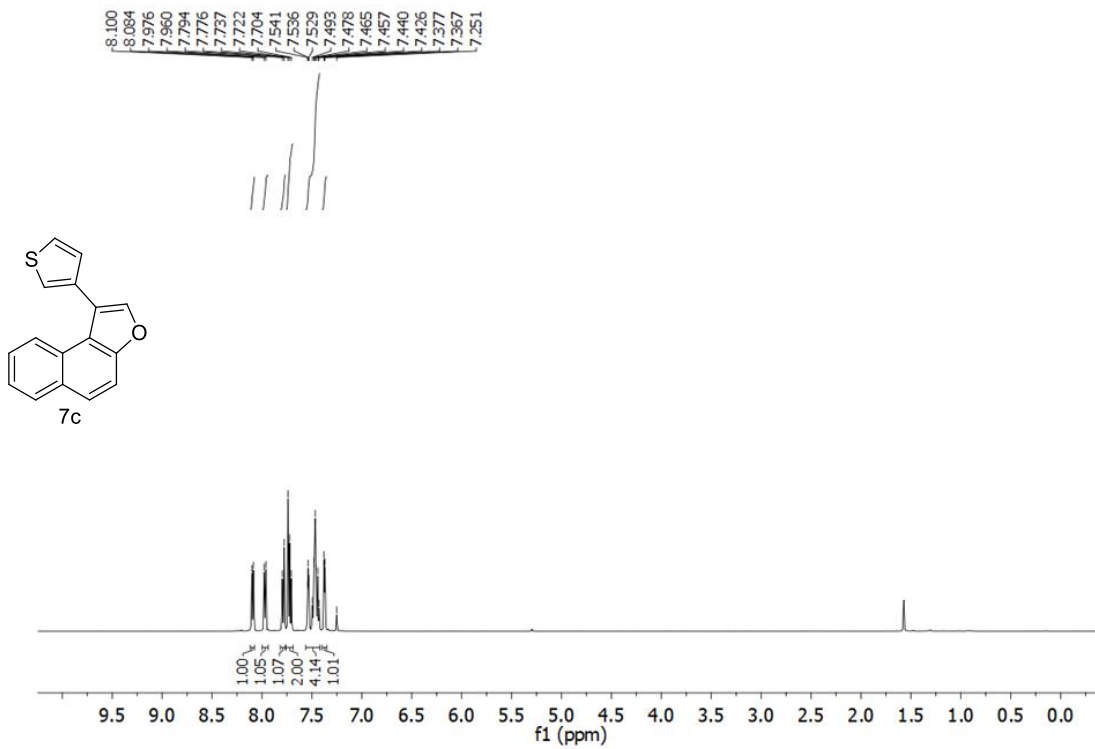

<sup>1</sup>H NMR of 7c in CDCl<sub>3</sub>

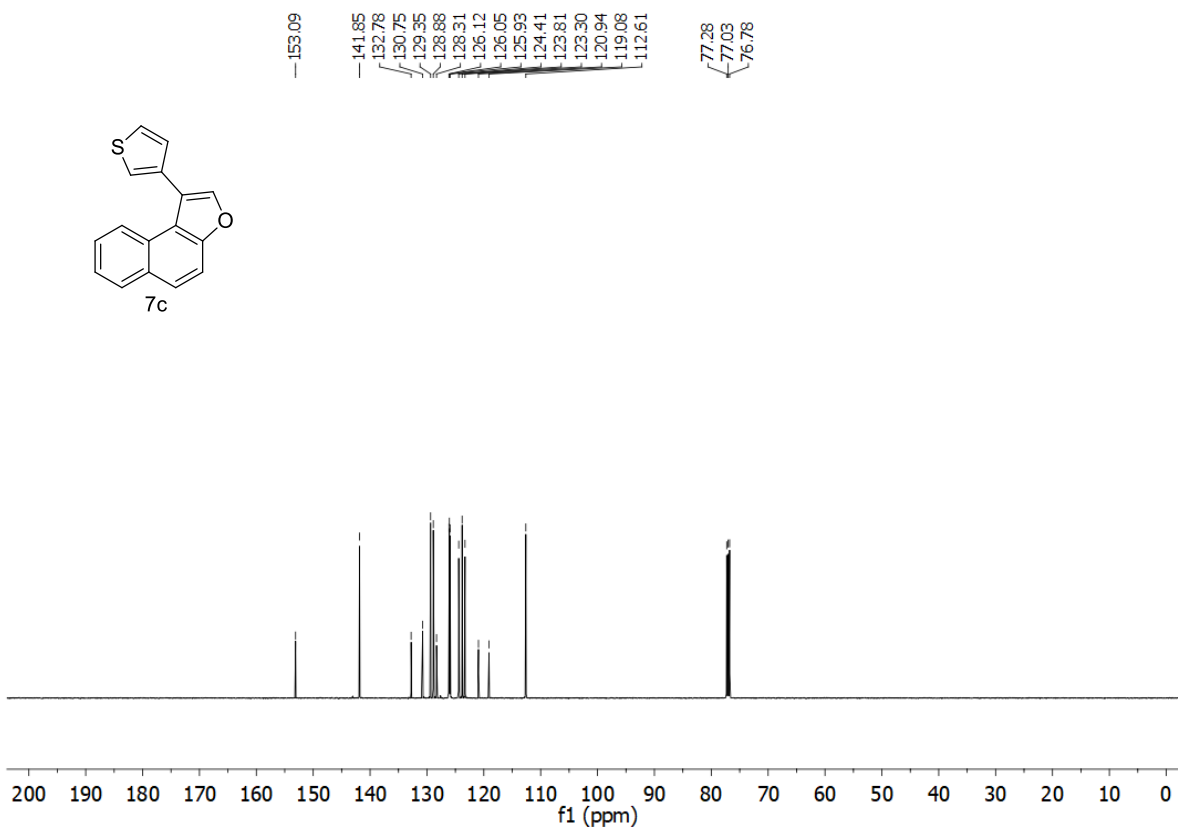

<sup>13</sup>C{<sup>1</sup>H} NMR of 7c in CDCl<sub>3</sub>

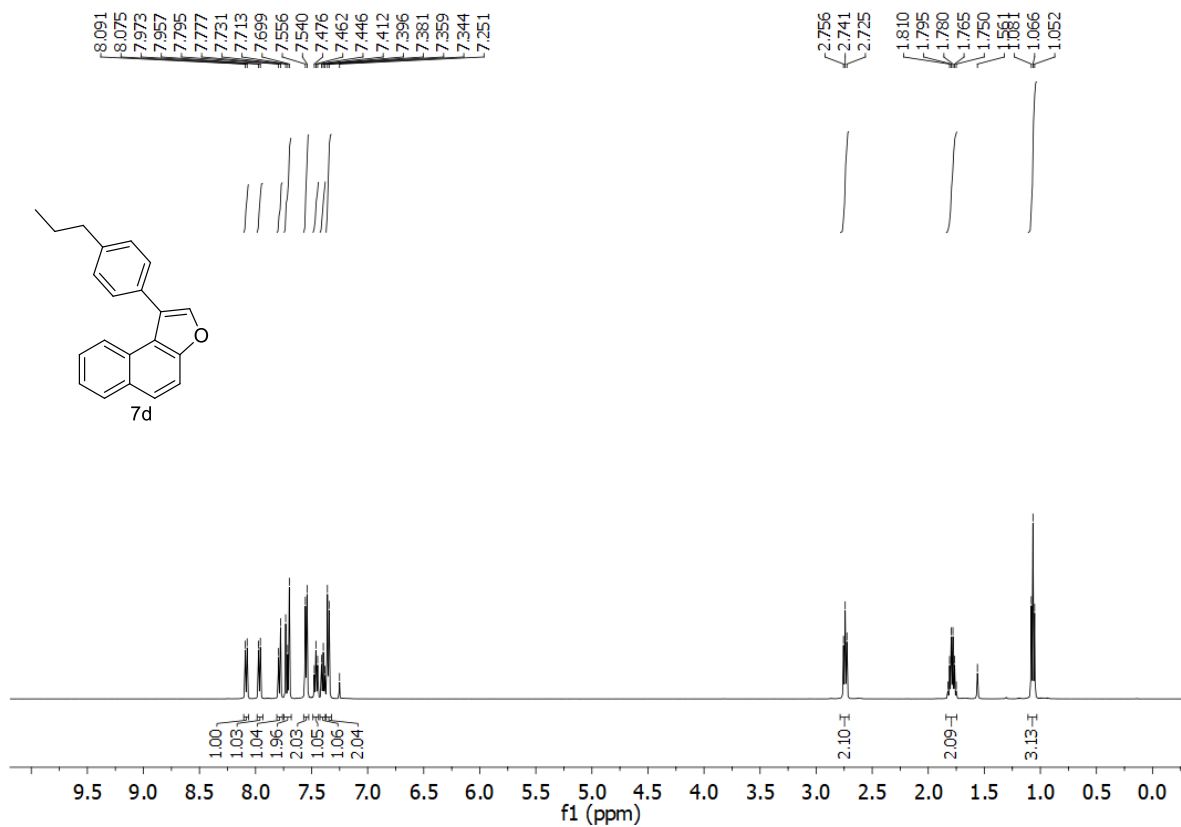

<sup>1</sup>H NMR of 7d in CDCl<sub>3</sub>

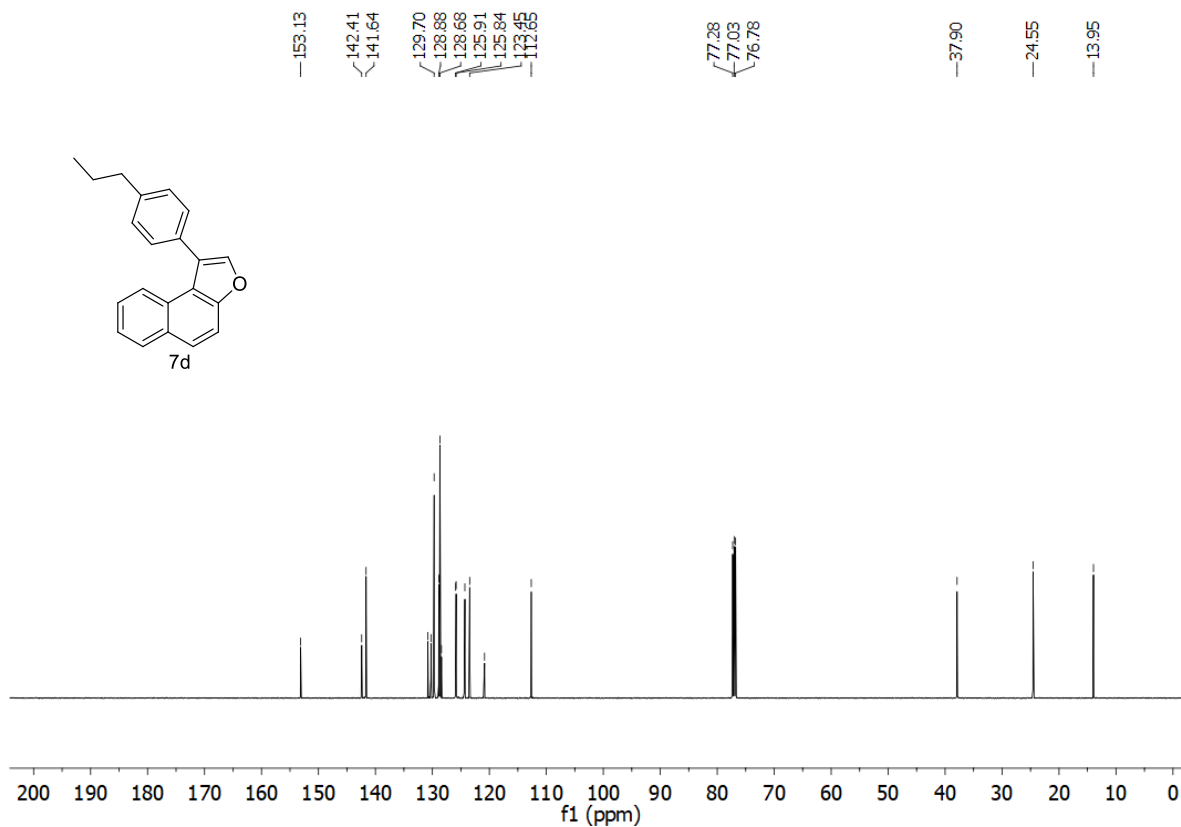

<sup>13</sup>C{<sup>1</sup>H} NMR of 7d in CDCl<sub>3</sub>

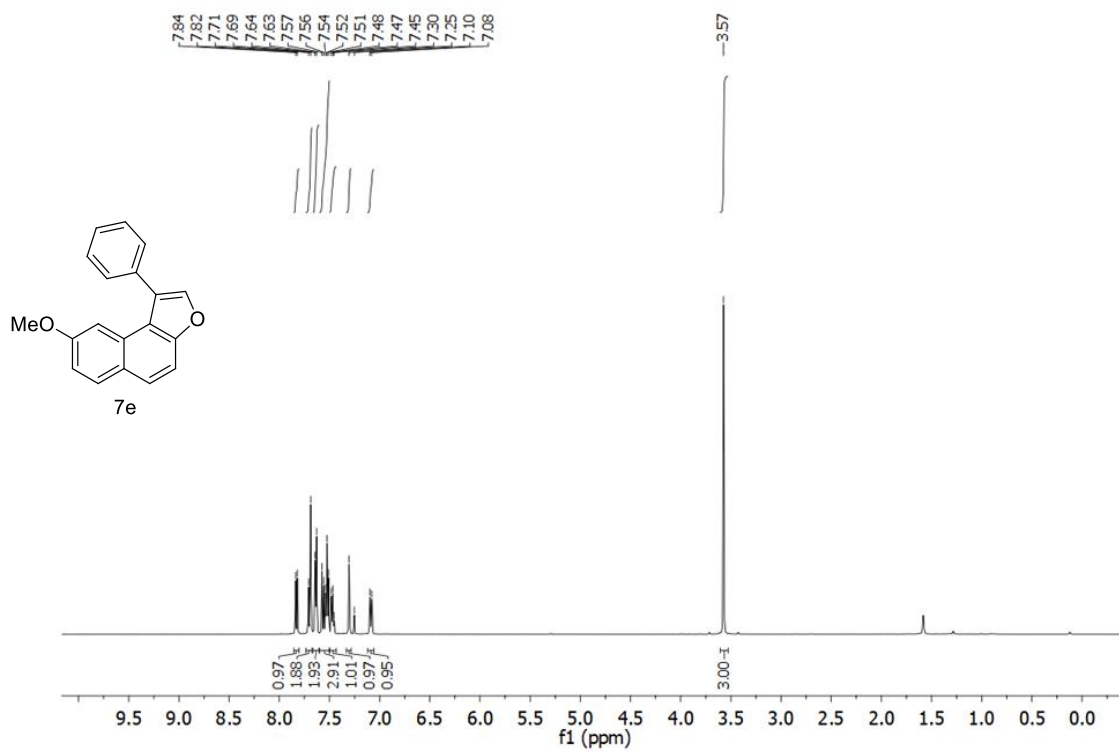

$^1\text{H NMR}$  of 7e in  $\text{CDCl}_3$

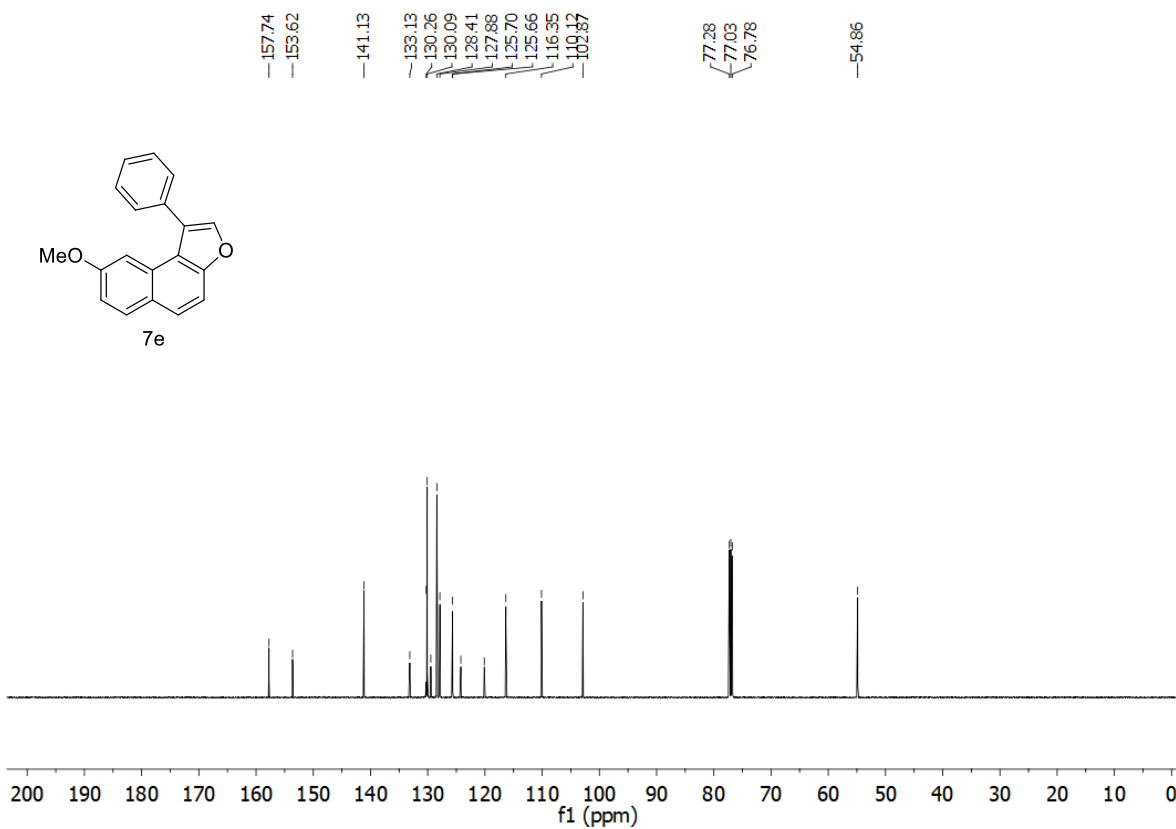

$^{13}\text{C}\{^1\text{H}\}$  NMR of 7e in  $\text{CDCl}_3$
